# Supplementary material for: Chemodivergent, multicomponent domino reactions in aqueous media: l-proline-catalyzed assembly of densely functionalized 4H-pyrano[2,3-c]pyrazoles and bispyrazolyl propanoates from simple, acyclic starting materials
Source: Royal Society of Chemistry journal article supplement (doi:10.1039/c3gc37128j), 2013-01-01
Supplement: c3gc37128j.pdf [file c3gc37128j.pdf]

## *SUPPORTING INFORMATION*

### **Chemodivergent, multicomponent domino reactions in aqueous media: L-Proline-catalyzed assembly of densely functionalized 4*H*-pyrano[2,3-*c*]pyrazoles and bispyrazolyl propanoates from simple, acyclic starting materials**

Pitchaimani Prasanna,<sup>a</sup> Subbu Perumal<sup>\*a</sup> and J. Carlos Menéndez<sup>\*b</sup>

<sup>a</sup>*Department of Organic Chemistry, School of Chemistry, Madurai Kamaraj University,  
Madurai – 625021, Tamil Nadu, India*

<sup>b</sup>*Departamento de Química Orgánica y Farmacéutica, Facultad de Farmacia, Universidad Complutense, 28040 Madrid, Spain*

E-mail: subbu.perum@gmail.com; josecm@farm.ucm.es

#### **Contents:**

|                                                           |         |
|-----------------------------------------------------------|---------|
| ORTEP diagram and Crystal data of <b>5g</b> and <b>7a</b> | S2-S4   |
| Copies of spectra of compounds <b>5</b>                   | S8-S33  |
| Copies of spectra of compounds <b>7</b>                   | S34-S46 |
| Chiral HPLC studies of compounds <b>5a</b> and <b>5f</b>  | S47-S50 |

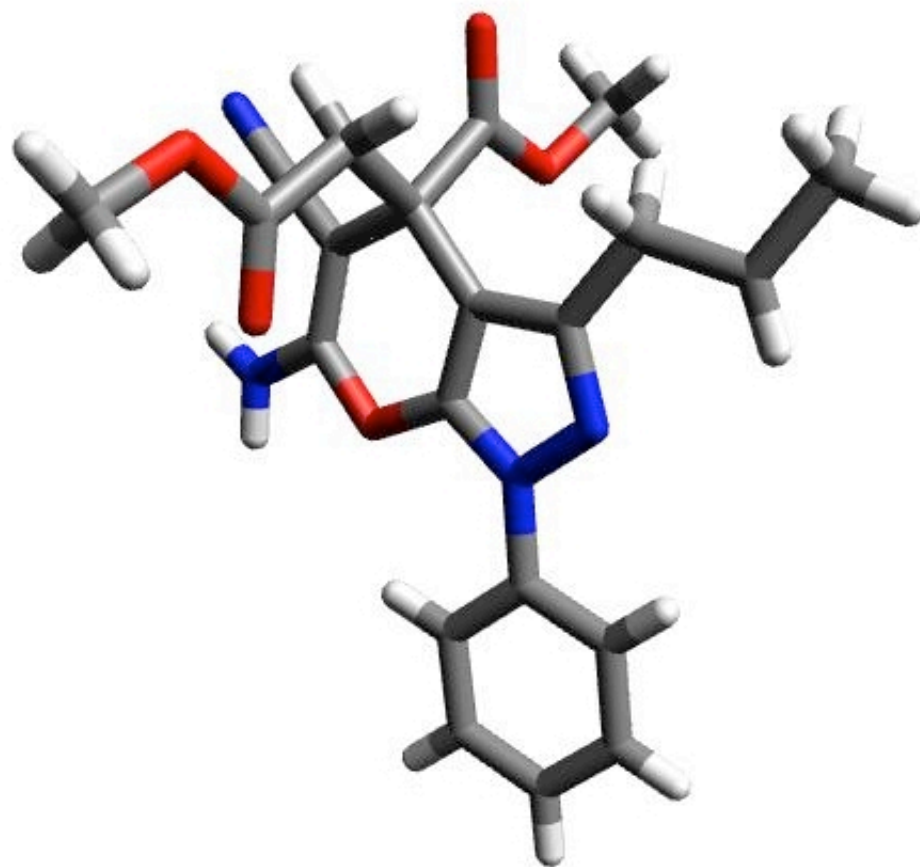

**Figure 1.** X-Ray structure of **5g**.

(CCDC number 894543)

---

Crystal data of **5g**

---

|                                 |                                                                                                          |
|---------------------------------|----------------------------------------------------------------------------------------------------------|
| Empirical formula               | C <sub>21</sub> H <sub>21</sub> N <sub>4</sub> O <sub>5</sub>                                            |
| Formula weight                  | 409.42                                                                                                   |
| Temperature                     | 296(2) K                                                                                                 |
| Wavelength                      | 0.71073 Å                                                                                                |
| Crystal system                  | Triclinic                                                                                                |
| Space group                     | P -1                                                                                                     |
| Unit cell dimensions            | a = 8.1356(9) Å α= 91.571(6)°.<br>b = 10.6065(13) Å β= 105.781(6)°.<br>c = 12.4620(15) Å γ= 100.384(6)°. |
| Volume                          | 1014.5(2) Å <sup>3</sup>                                                                                 |
| Z                               | 2                                                                                                        |
| Density (calculated)            | 1.340 kg/m <sup>3</sup>                                                                                  |
| Absorption coefficient          | 0.098 mm <sup>-1</sup>                                                                                   |
| F(000)                          | 430                                                                                                      |
| Crystal size                    | 0.24 x 0.22 x 0.17 mm <sup>3</sup>                                                                       |
| Theta range for data collection | 2.0 to 25.0°.                                                                                            |
| Index ranges                    | -9≤h≤9, -12≤k≤12, -14≤l≤14                                                                               |
| Reflections collected/ unique   | 15163/ 3589 [R(int) = 0.0356]                                                                            |
| Completeness to theta = 25.0°   | 100 %                                                                                                    |

|                                |                                    |
|--------------------------------|------------------------------------|
| Absorption correction          | Psi scan                           |
| Refinement method              | Full-matrix least-squares on F2    |
| Data / restraints / parameters | 3589 / 3 / 281                     |
| Goodness-of-fit on F2          | 1.014                              |
| Final R indices [I>2sigma(I)]  | R1 = 0.0510, wR2 = 0.1366          |
| R indices (all data)           | R1 = 0.0447, wR2 = 0.1293          |
| Largest diff. peak and hole    | 0.479 and -0.243 e.Å <sup>-3</sup> |

---

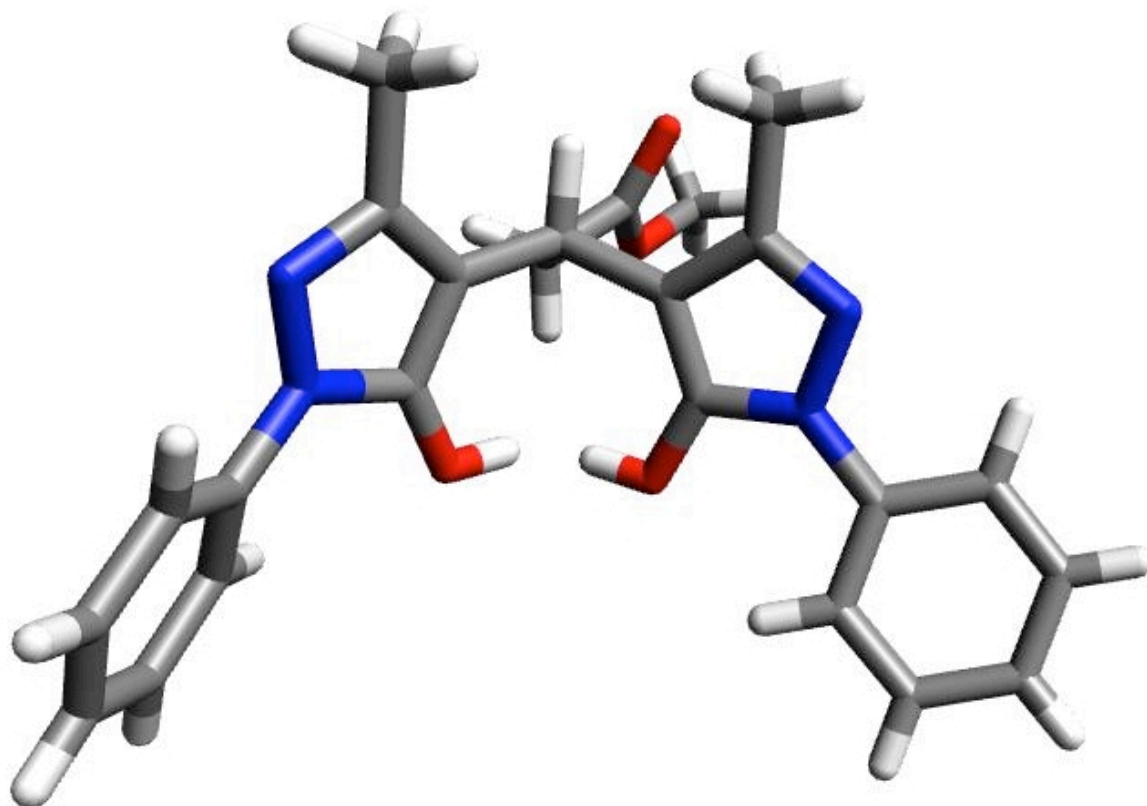

**Figure 2.** X-Ray structure of **7a**.

CCDC number 896612

---

Crystal data of **7a**

---

|                                 |                                                                                                                 |
|---------------------------------|-----------------------------------------------------------------------------------------------------------------|
| Empirical formula               | C <sub>24</sub> H <sub>23</sub> N <sub>4</sub> O <sub>4</sub>                                                   |
| Formula weight                  | 431.46                                                                                                          |
| Temperature                     | 293(2) K                                                                                                        |
| Wavelength                      | 0.71073 Å                                                                                                       |
| Crystal system                  | Monoclinic                                                                                                      |
| Space group                     | P 21/n                                                                                                          |
| Unit cell dimensions            | a = 12.2016(5) Å $\alpha$ = 90°.<br>b = 13.6995(5) Å $\beta$ = 110.166(2)°.<br>c = 15.4526(5) Å $\gamma$ = 90°. |
| Volume                          | 2424.65(16) Å <sup>3</sup>                                                                                      |
| Z                               | 4                                                                                                               |
| Density (calculated)            | 1.182 kg/m <sup>3</sup>                                                                                         |
| Absorption coefficient          | 0.082 mm <sup>-1</sup>                                                                                          |
| F(000)                          | 908                                                                                                             |
| Crystal size                    | 0.20 x 0.20 x 0.20 mm <sup>3</sup>                                                                              |
| Theta range for data collection | 1.55 to 28.38°.                                                                                                 |
| Index ranges                    | -13 ≤ h ≤ 16, -18 ≤ k ≤ 15, -20 ≤ l ≤ 20                                                                        |
| Reflections collected/ unique   | 24003/ 6087 [R(int) = 0.0270]                                                                                   |
| Completeness to theta = 28.38°  | 100 %                                                                                                           |

|                                |                                    |
|--------------------------------|------------------------------------|
| Absorption correction          | Psi scan                           |
| Refinement method              | Full-matrix least-squares on F2    |
| Data / restraints / parameters | 6087 / 0 / 293                     |
| Goodness-of-fit on F2          | 1.103                              |
| Final R indices [I>2sigma(I)]  | R1 = 0.0799, wR2 = 0.2121          |
| R indices (all data)           | R1 = 0.0604, wR2 = 0.2001          |
| Largest diff. peak and hole    | 0.740 and -0.427 e.Å <sup>-3</sup> |

---

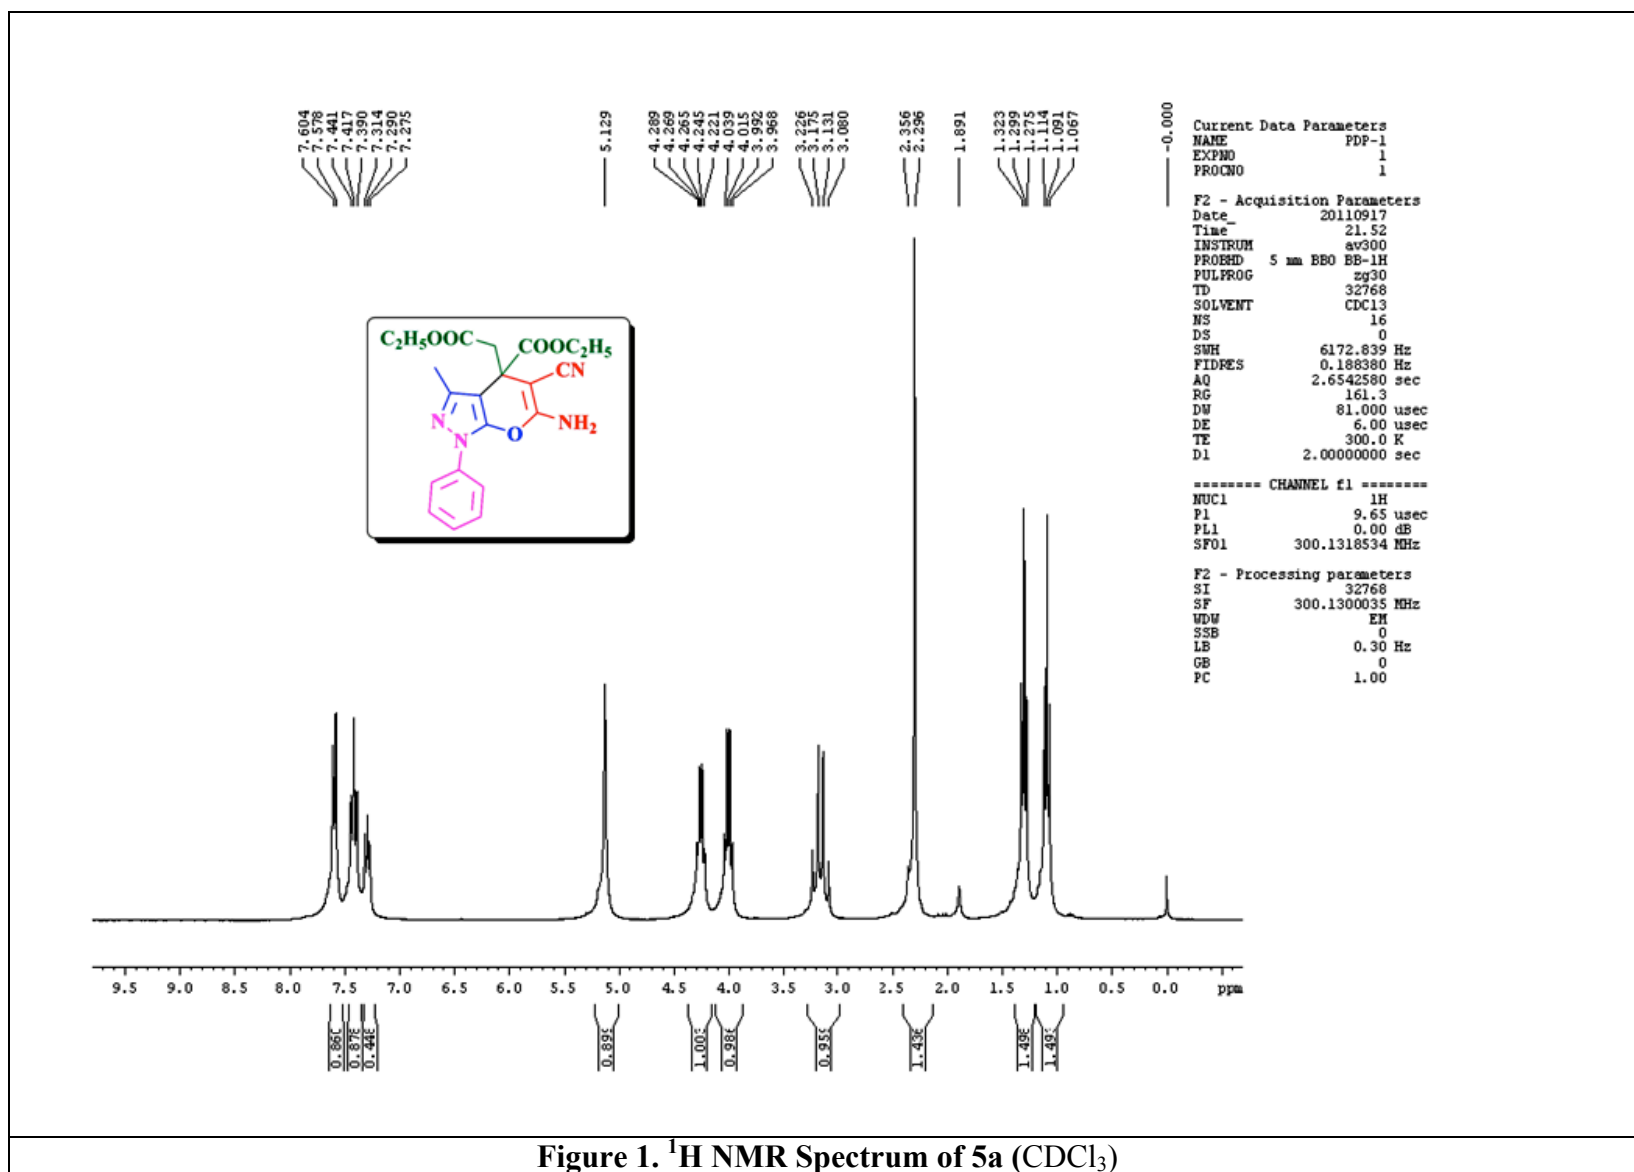

Figure 1. <sup>1</sup>H NMR Spectrum of 5a (CDCl<sub>3</sub>)



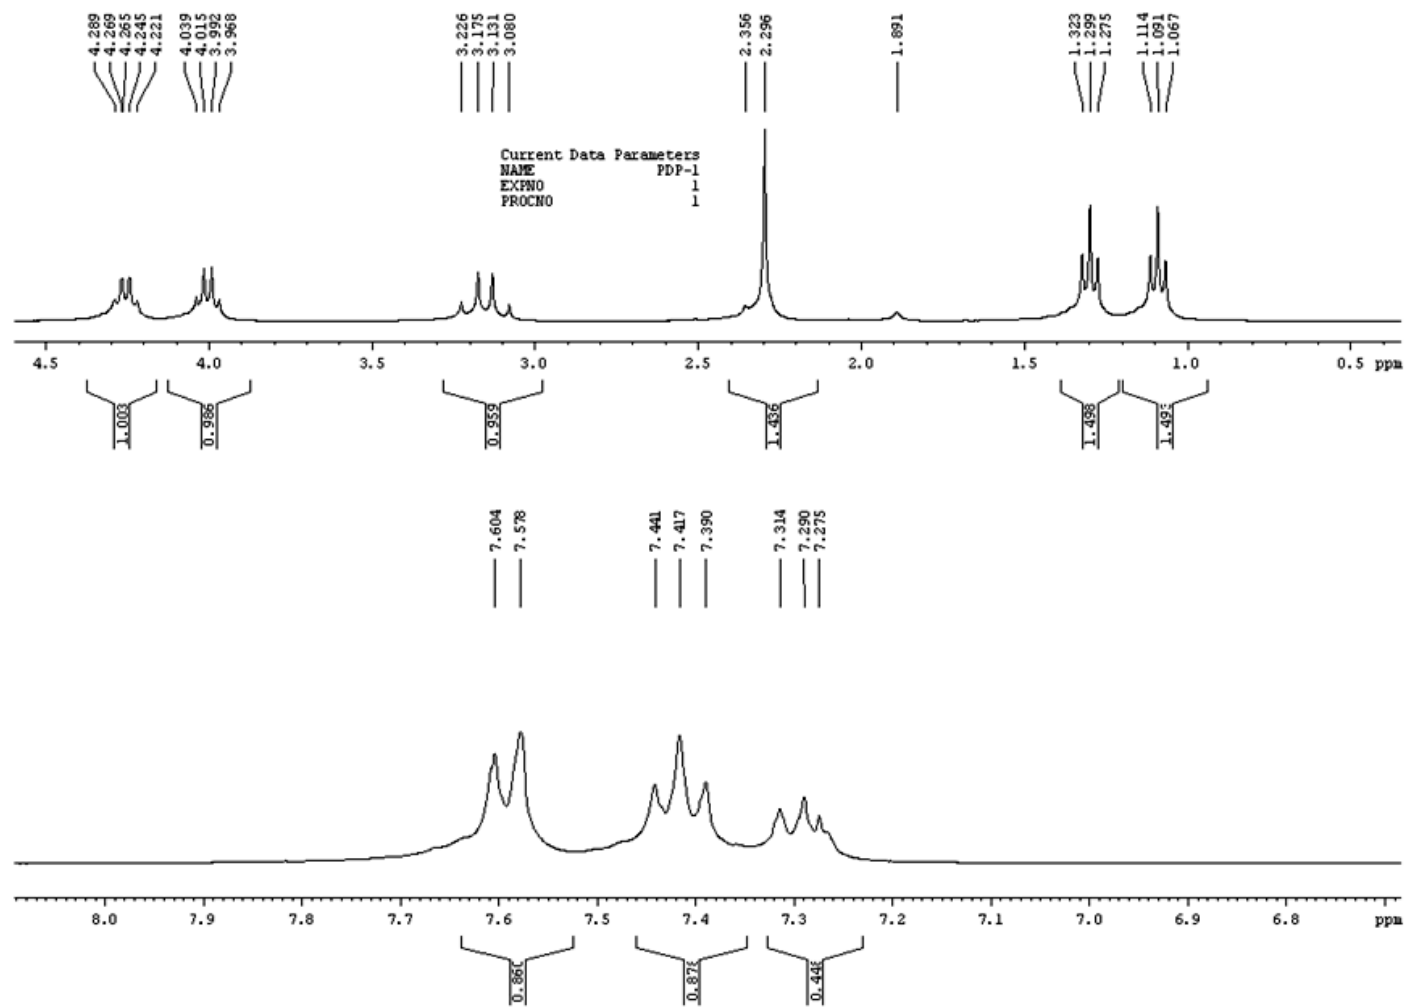

2

Figure 2. <sup>1</sup>H NMR Spectrum of 5a (expanded)

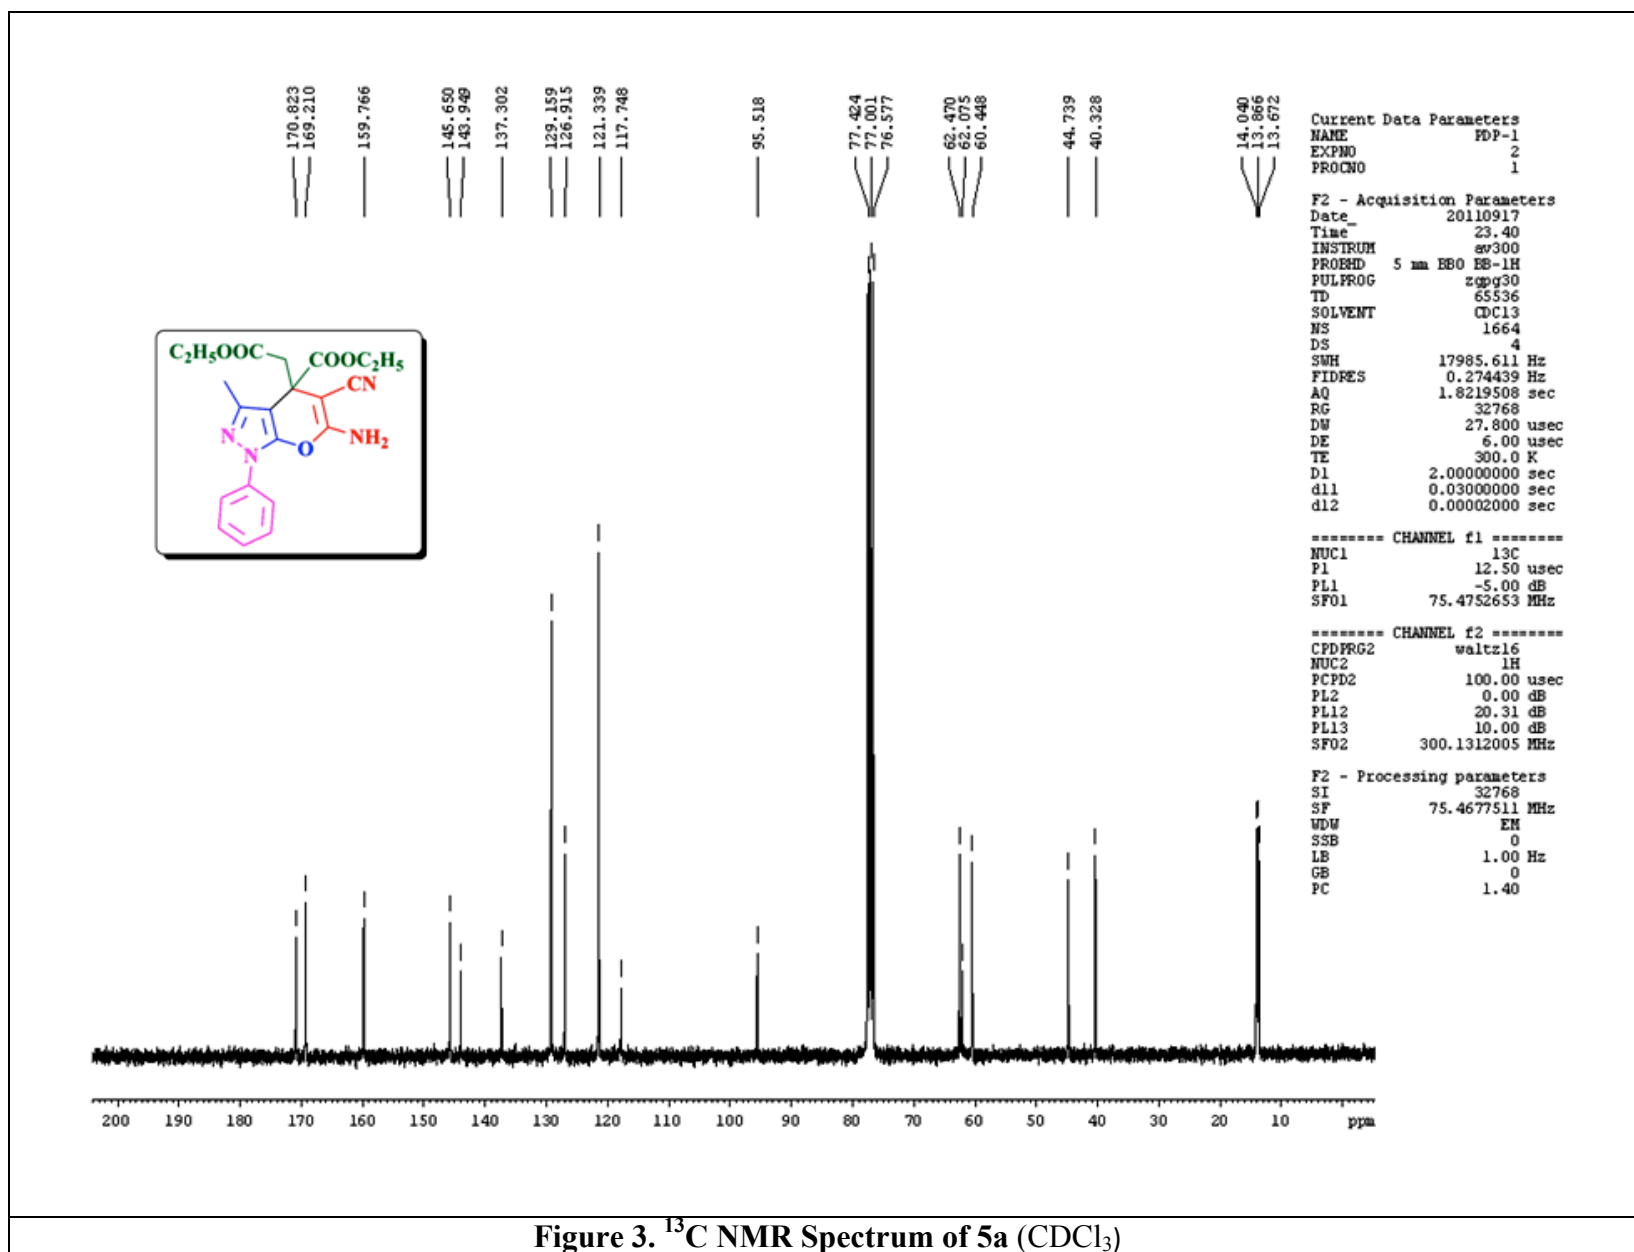

Figure 3.  $^{13}\text{C}$  NMR Spectrum of 5a ( $\text{CDCl}_3$ )

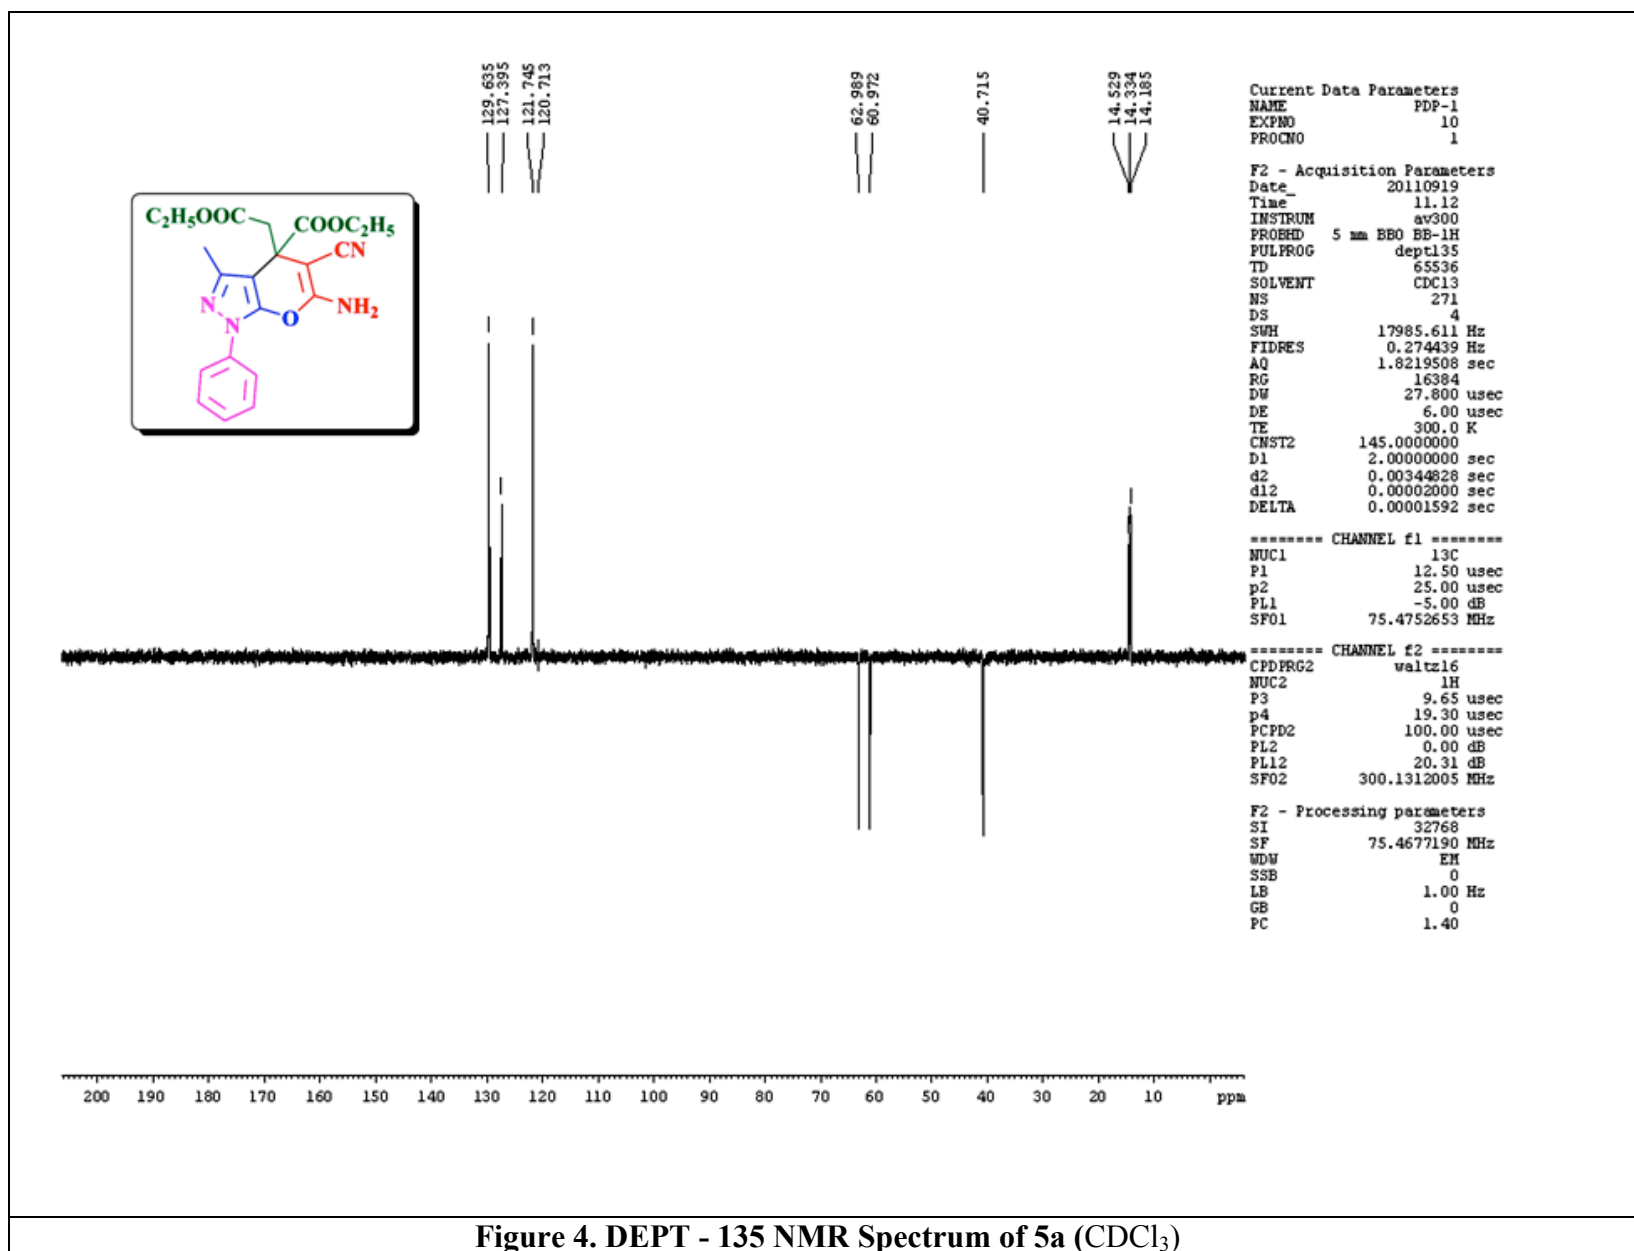

Figure 4. DEPT - 135 NMR Spectrum of 5a (CDCl<sub>3</sub>)

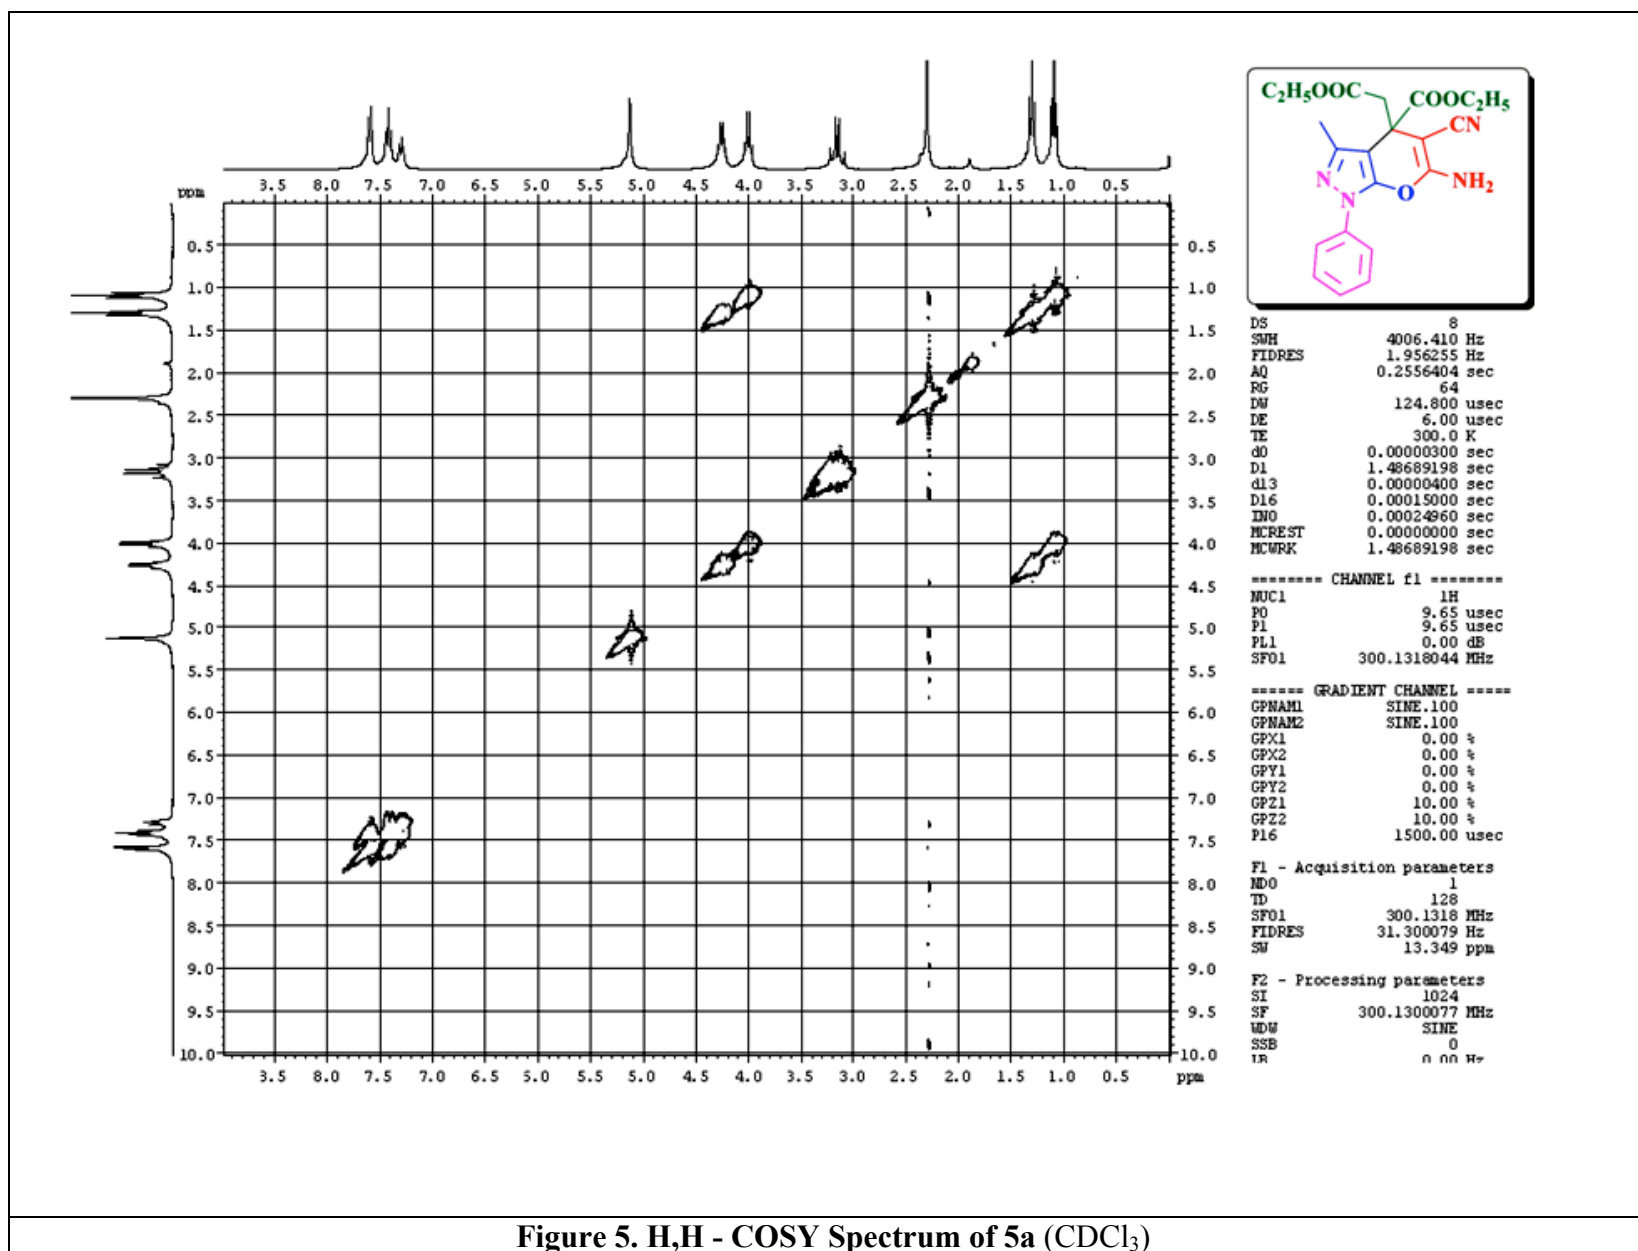

Figure 5. H,H - COSY Spectrum of 5a (CDCl<sub>3</sub>)

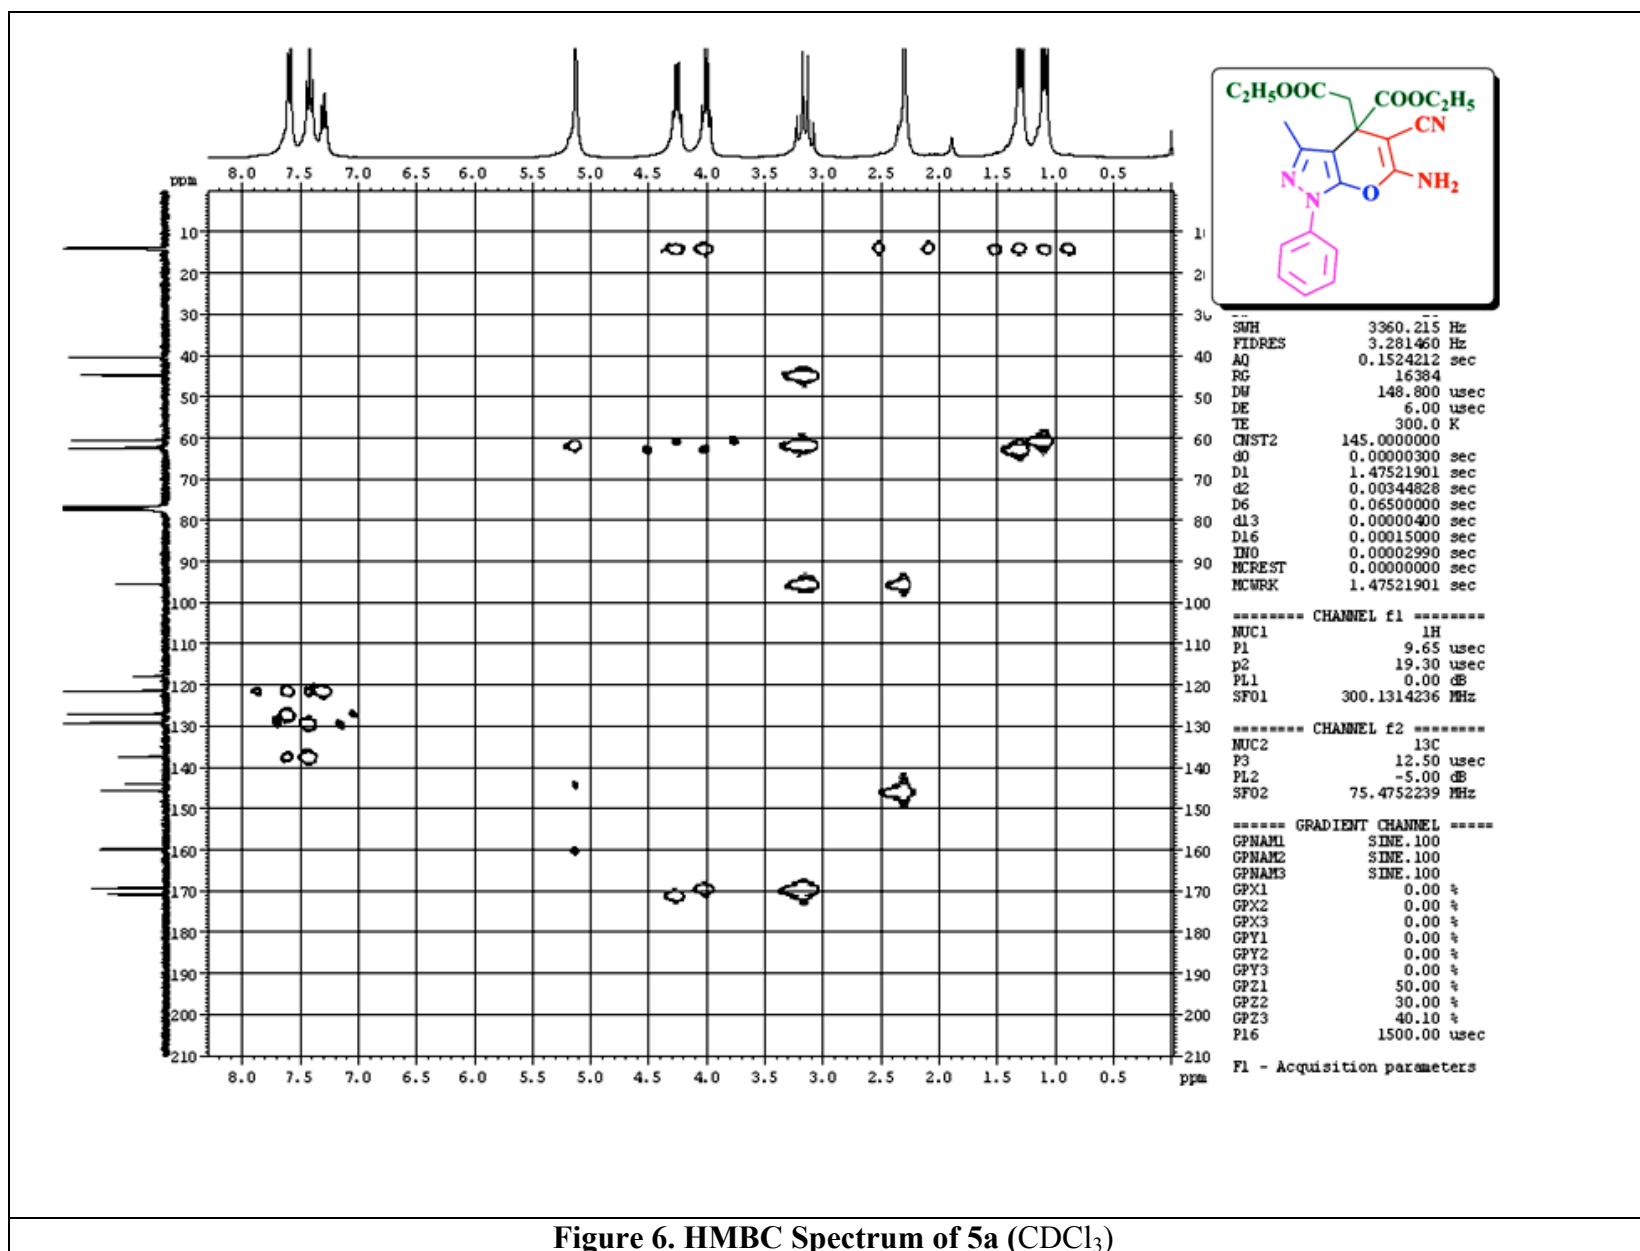

Figure 6. HMBC Spectrum of 5a (CDCl<sub>3</sub>)

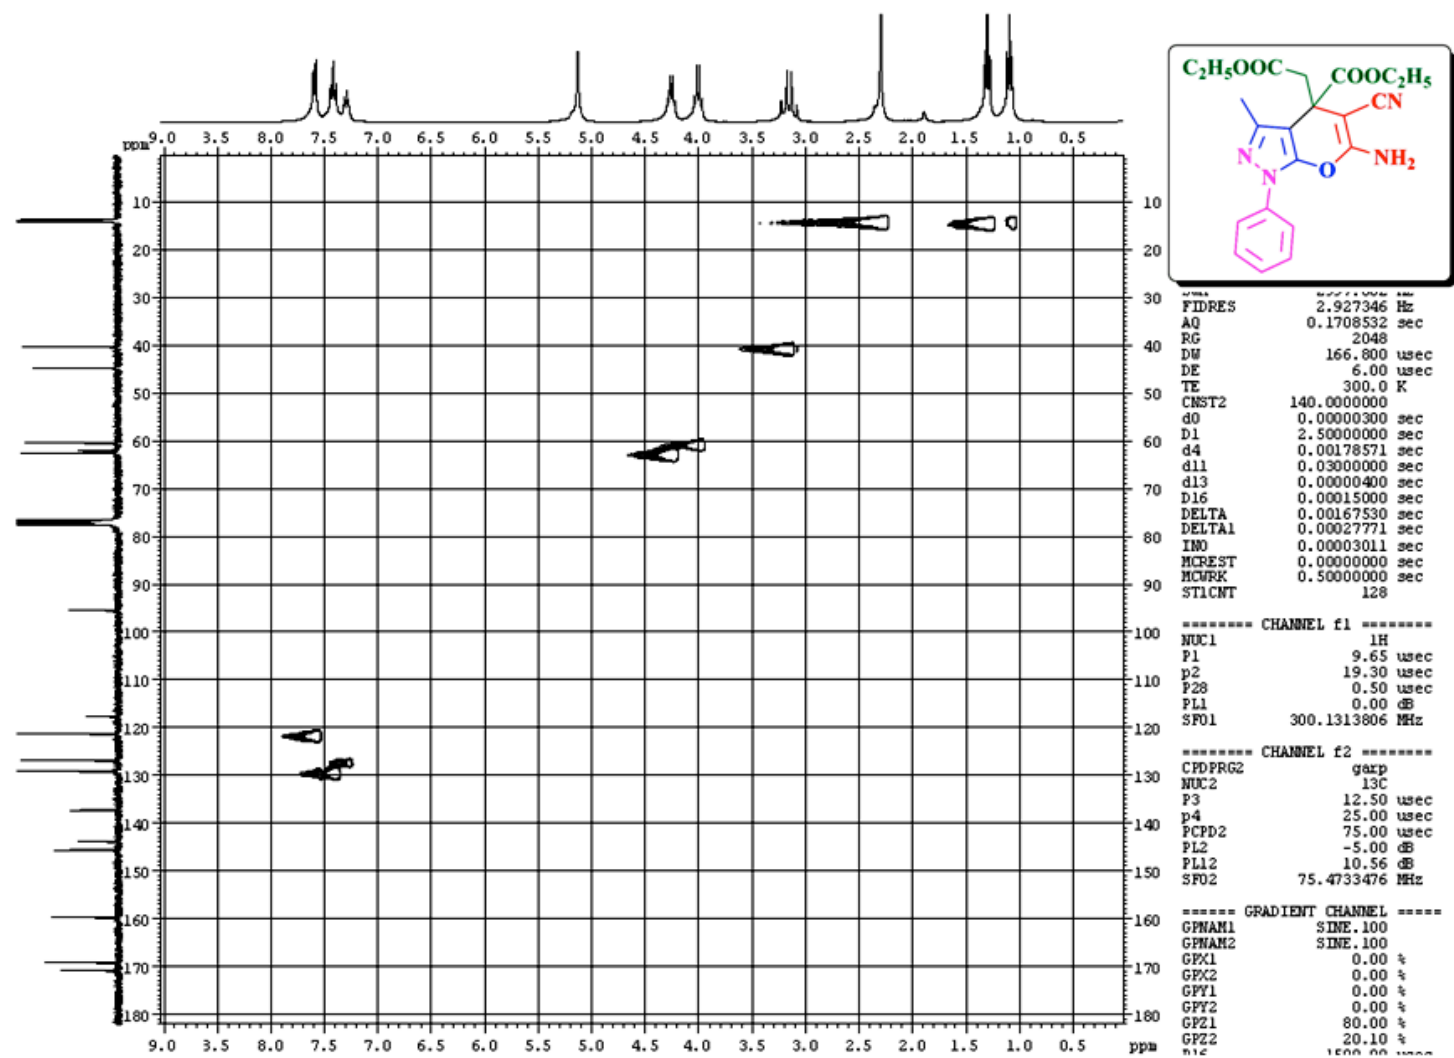

Figure 7. C,H-COSY Spectrum of 5a (CDCl<sub>3</sub>)

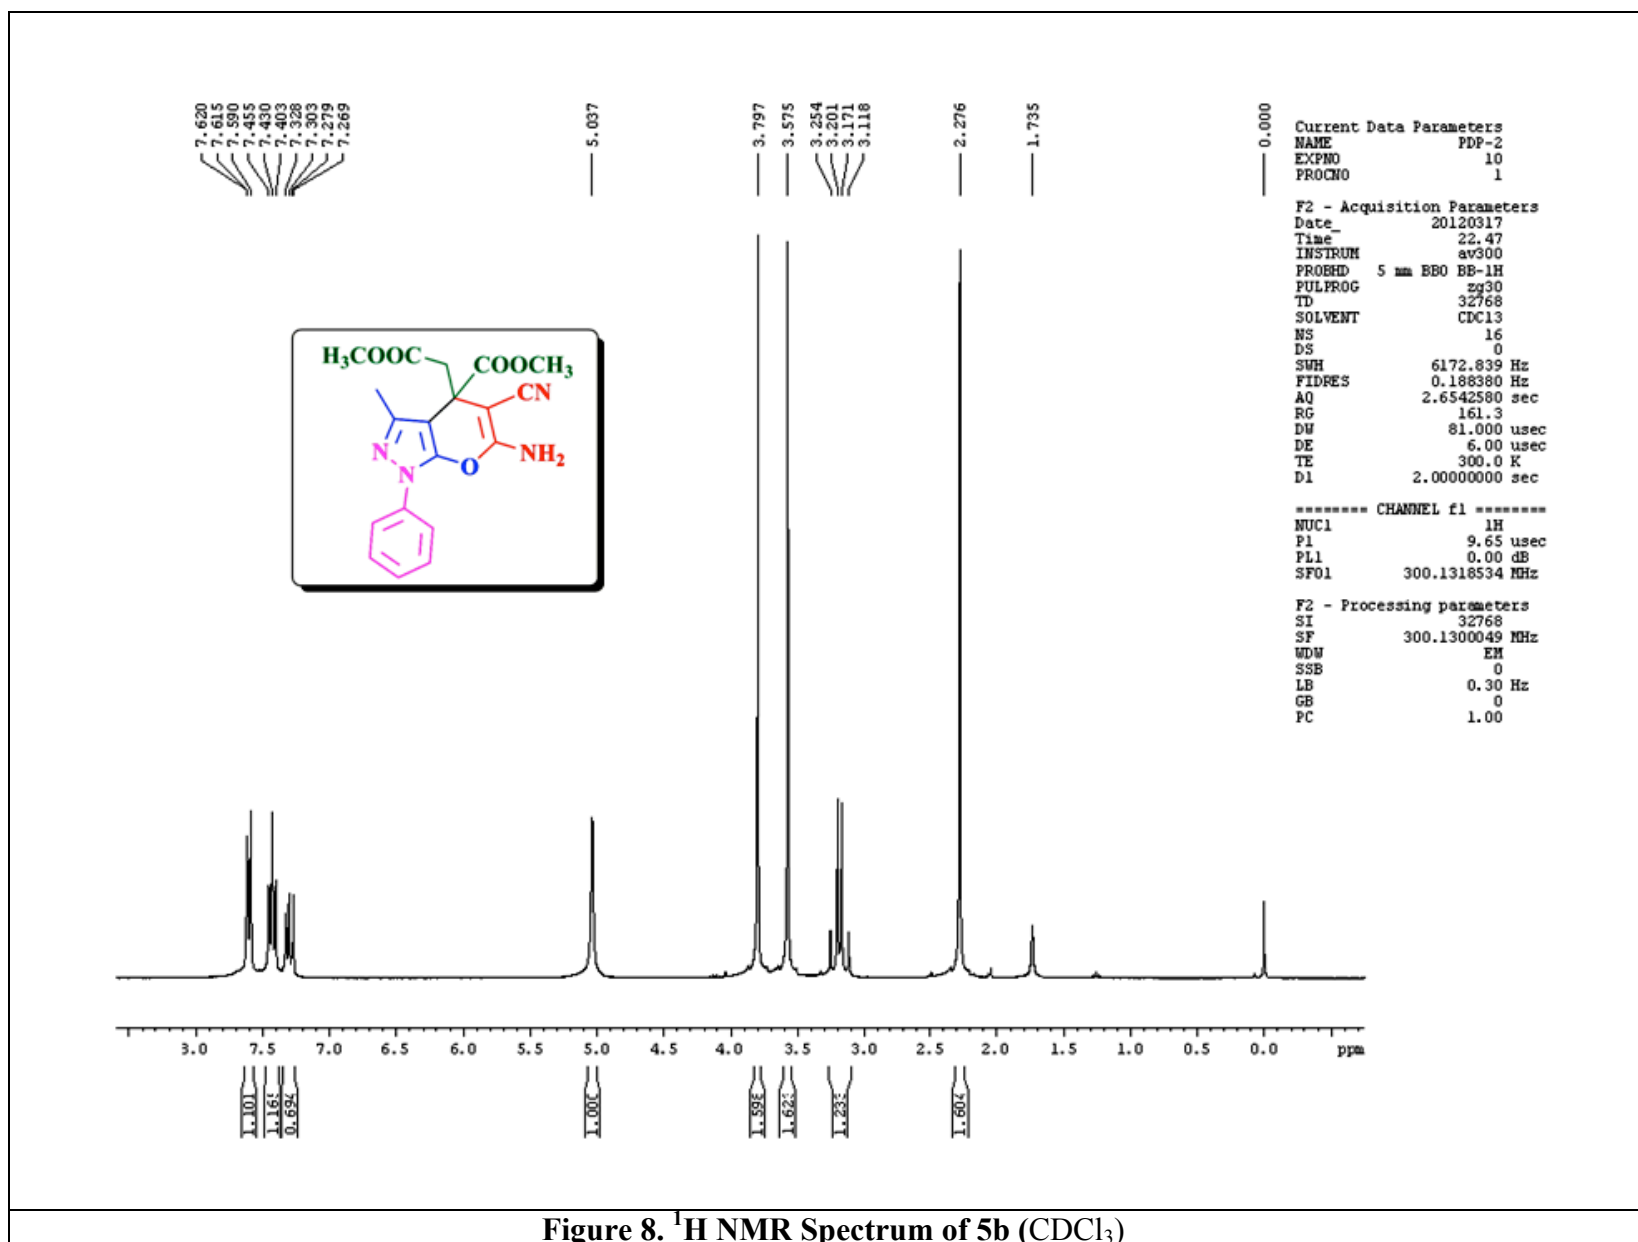

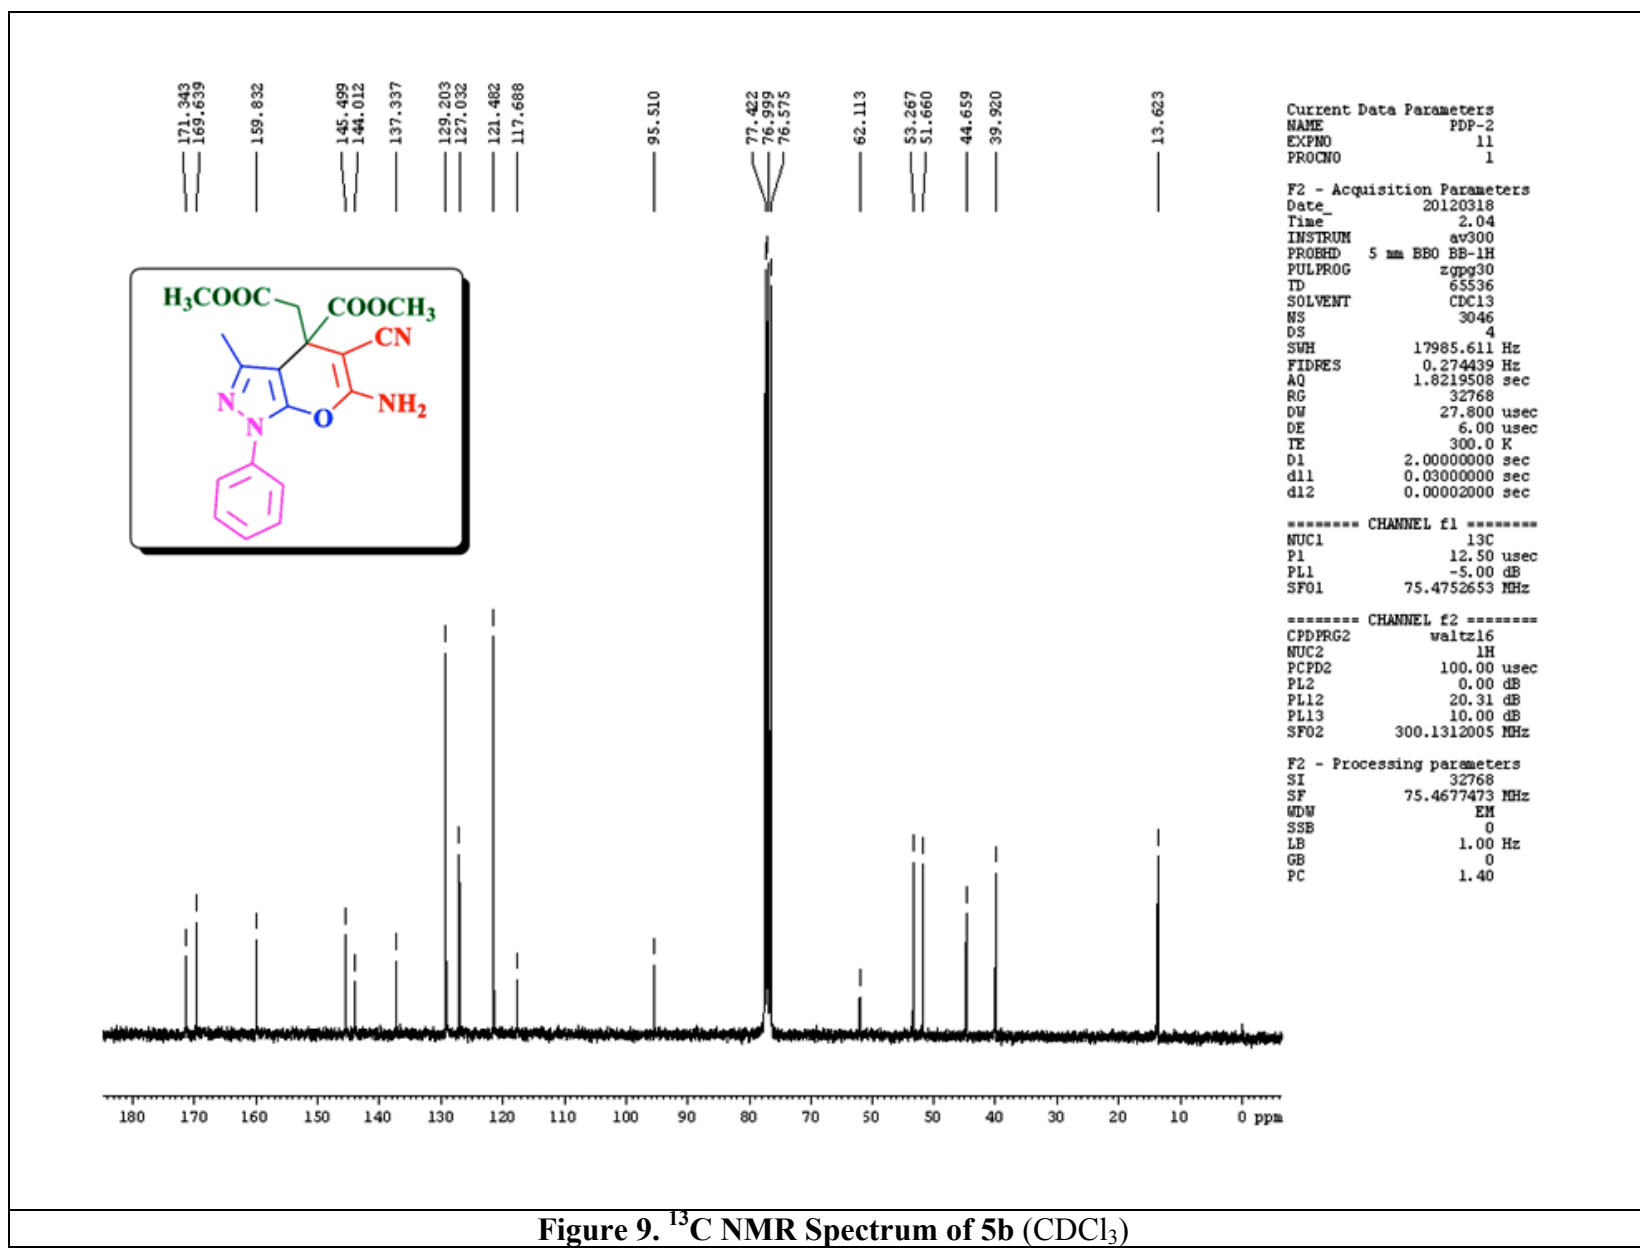

Figure 9.  $^{13}\text{C}$  NMR Spectrum of 5b ( $\text{CDCl}_3$ )



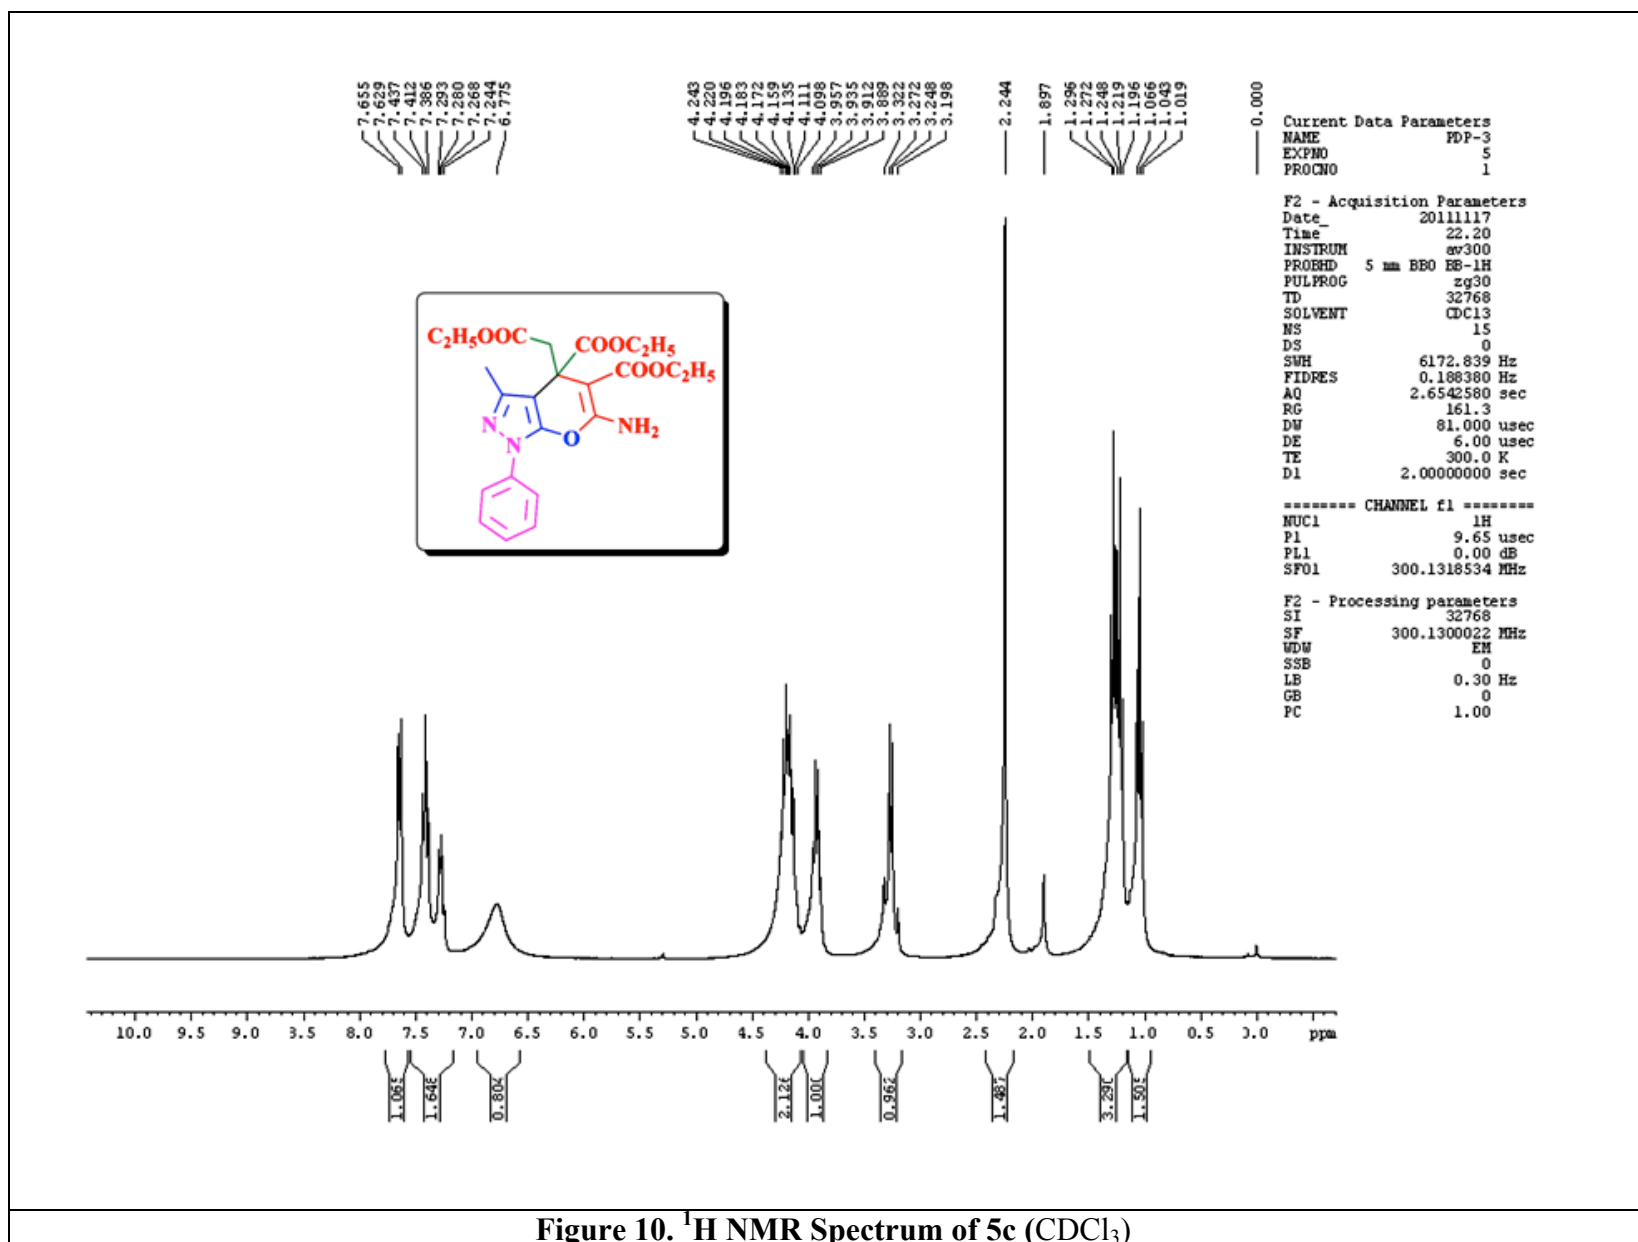

Figure 10. <sup>1</sup>H NMR Spectrum of 5c (CDCl<sub>3</sub>)

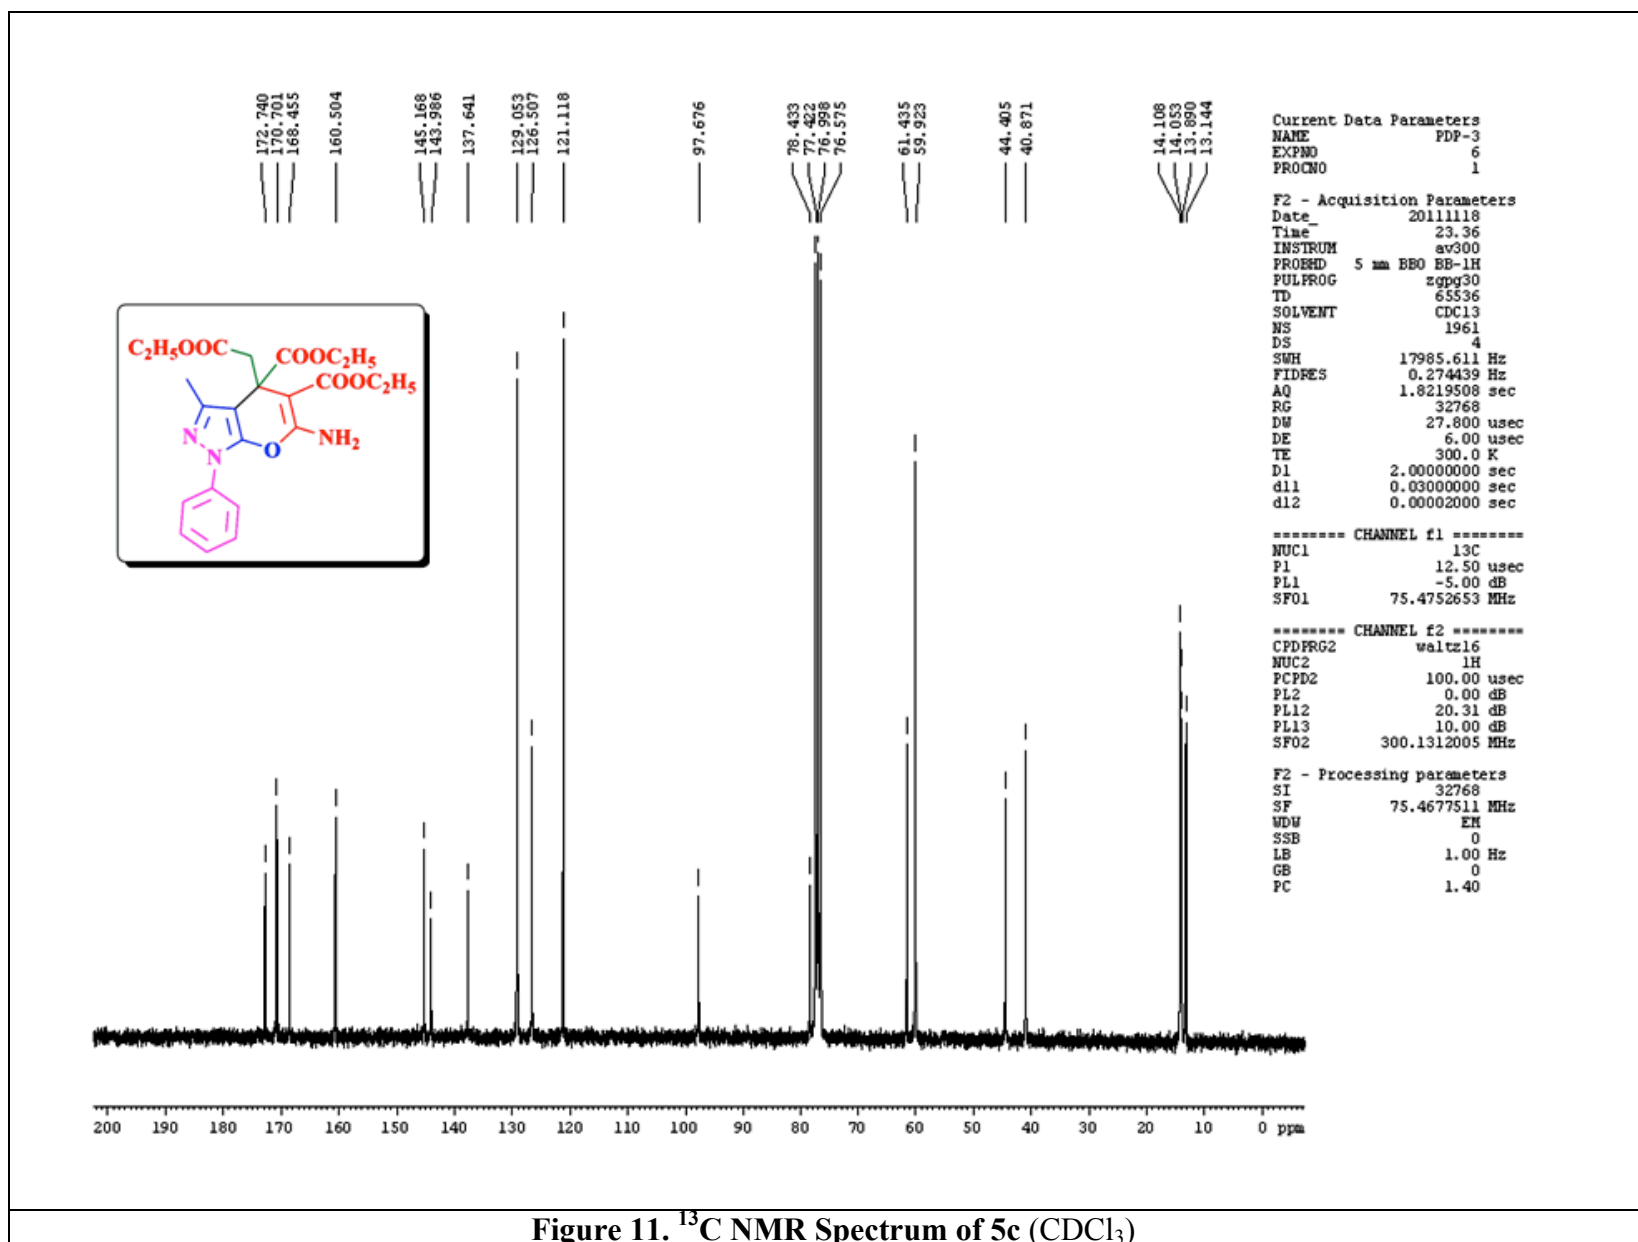

Figure 11. <sup>13</sup>C NMR Spectrum of 5c (CDCl<sub>3</sub>)

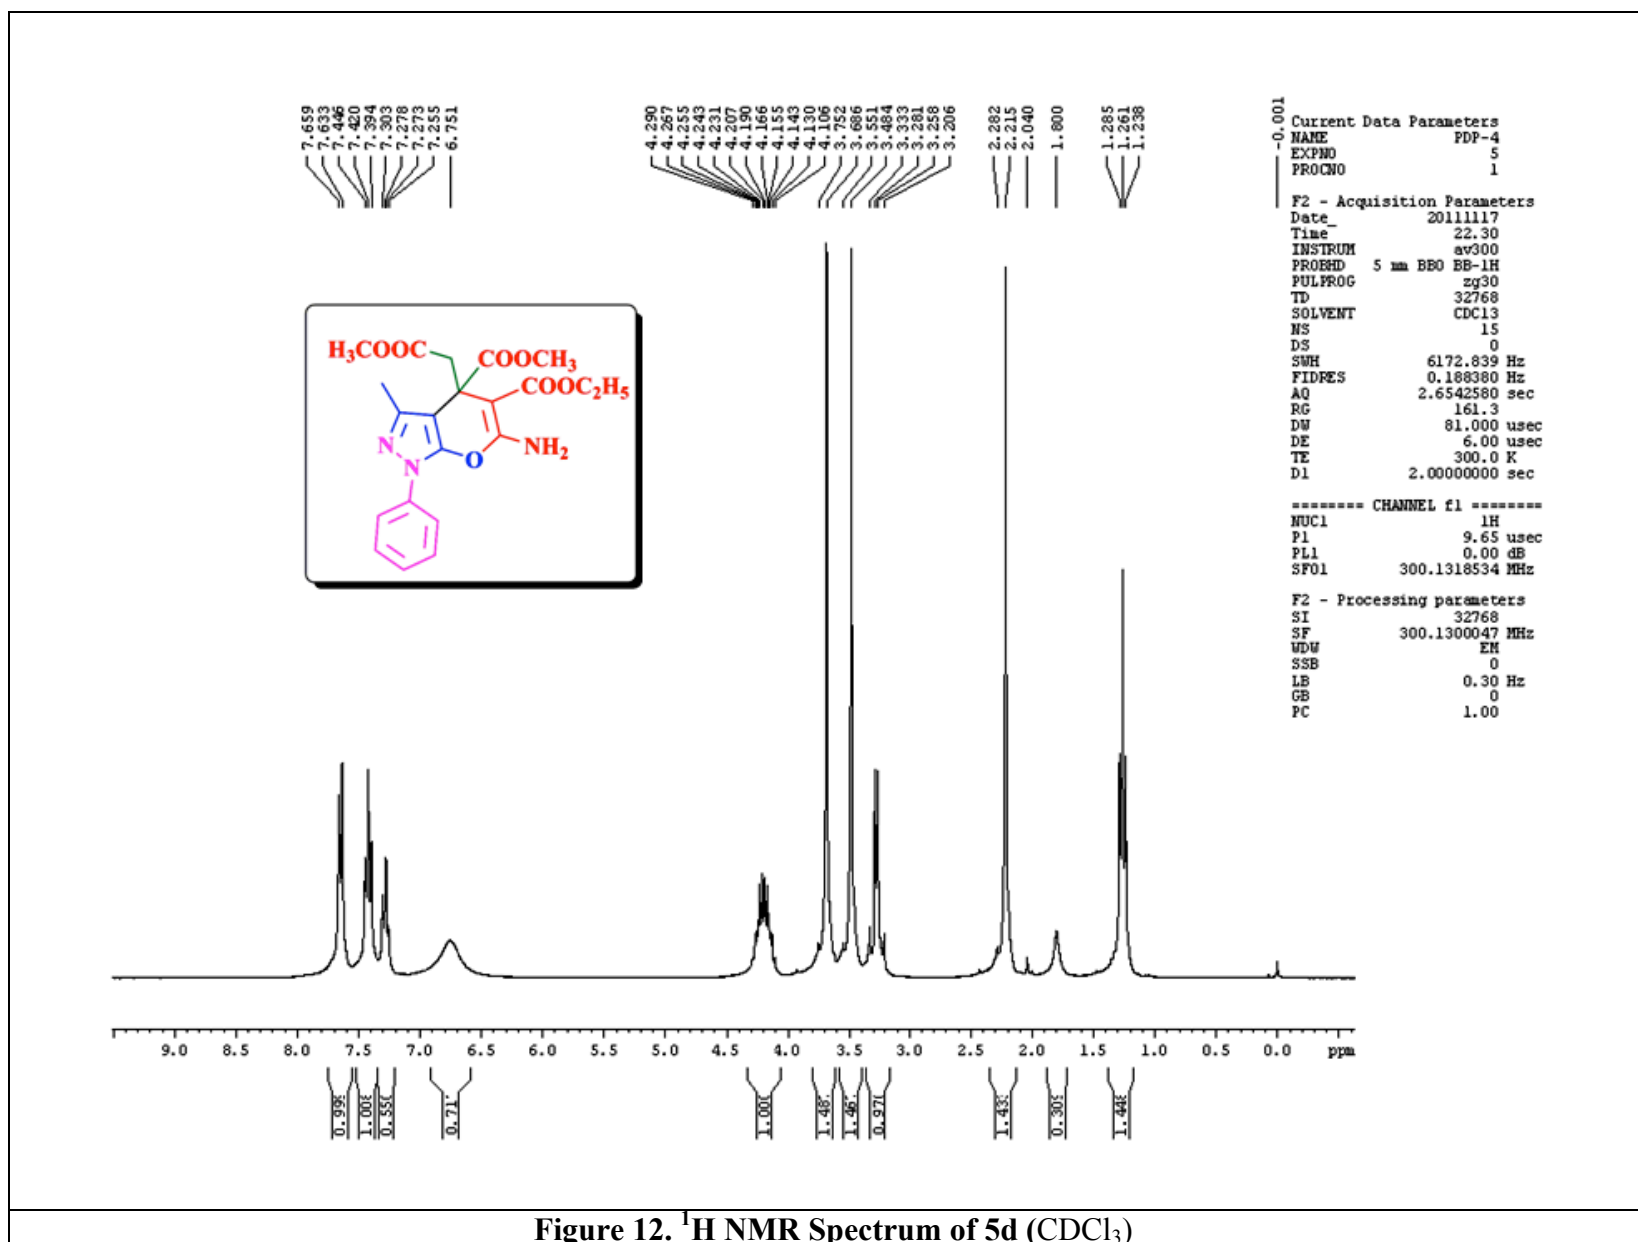

Figure 12. <sup>1</sup>H NMR Spectrum of 5d (CDCl<sub>3</sub>)

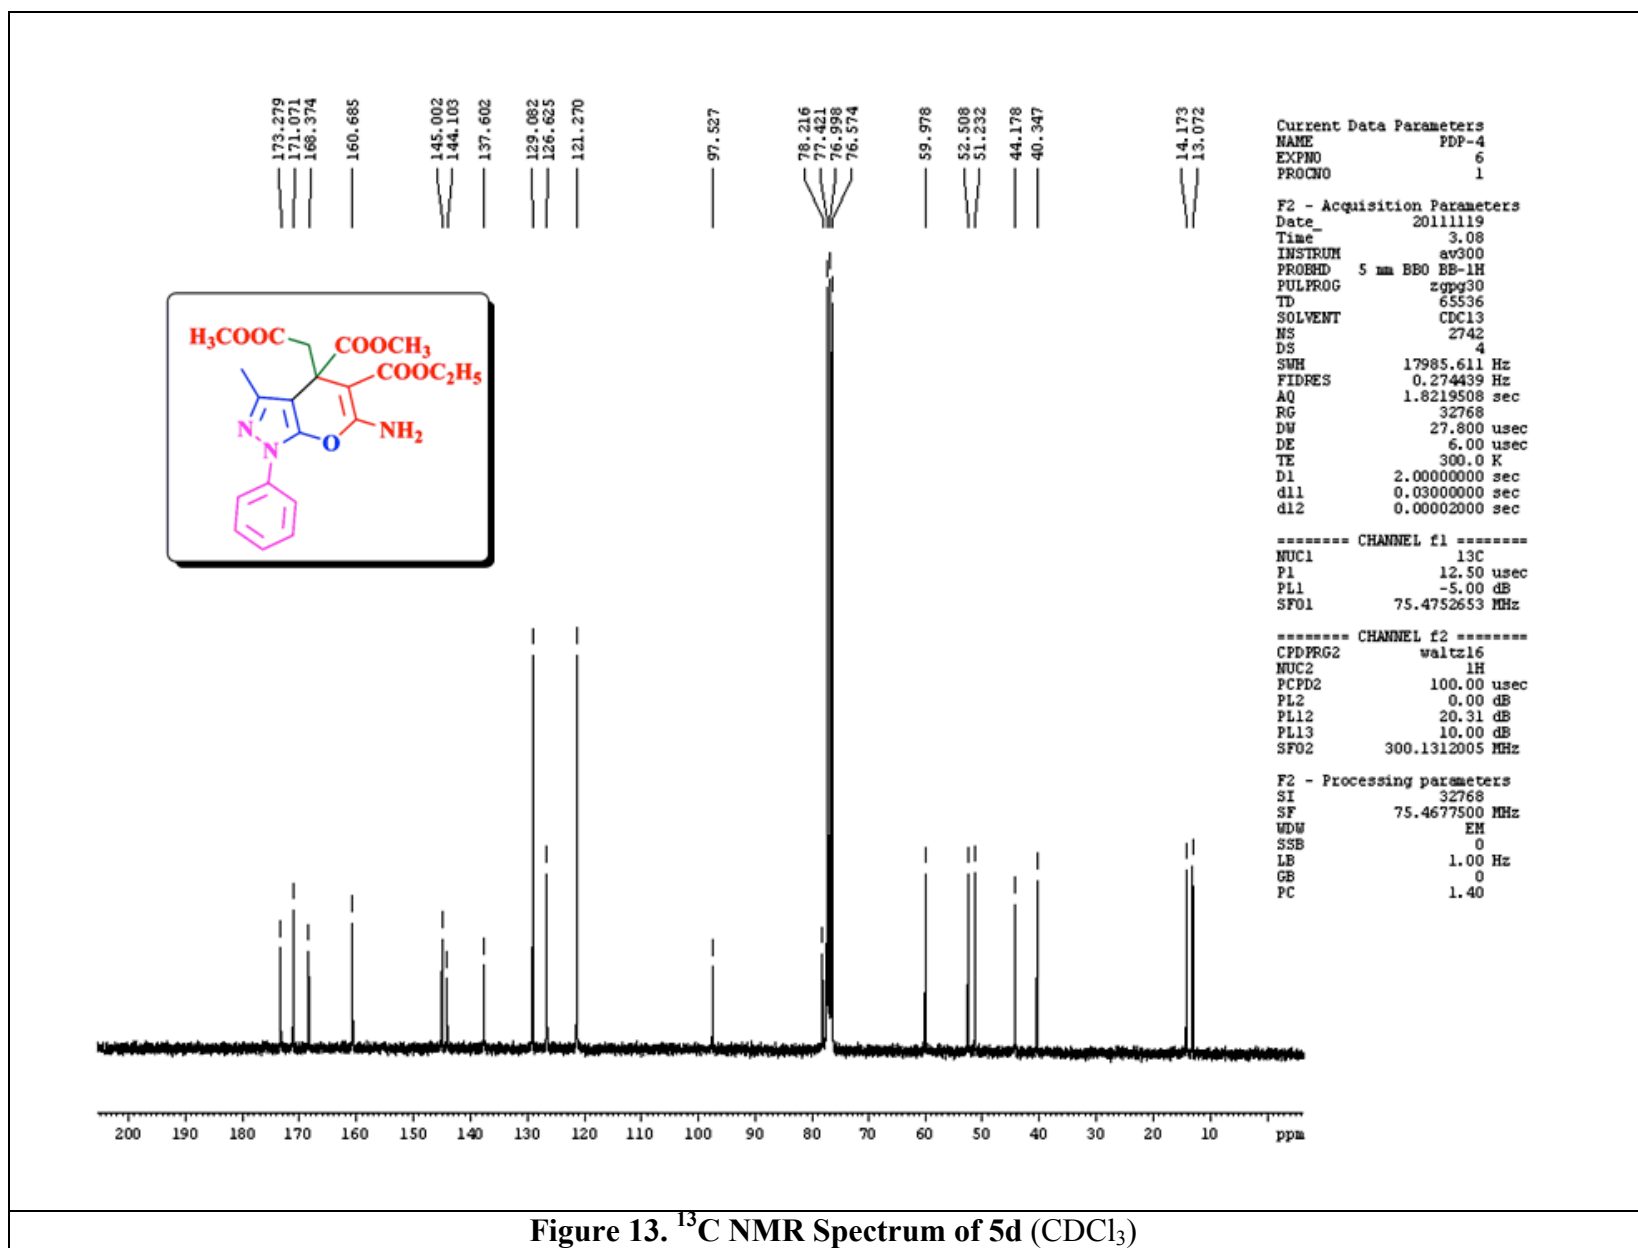

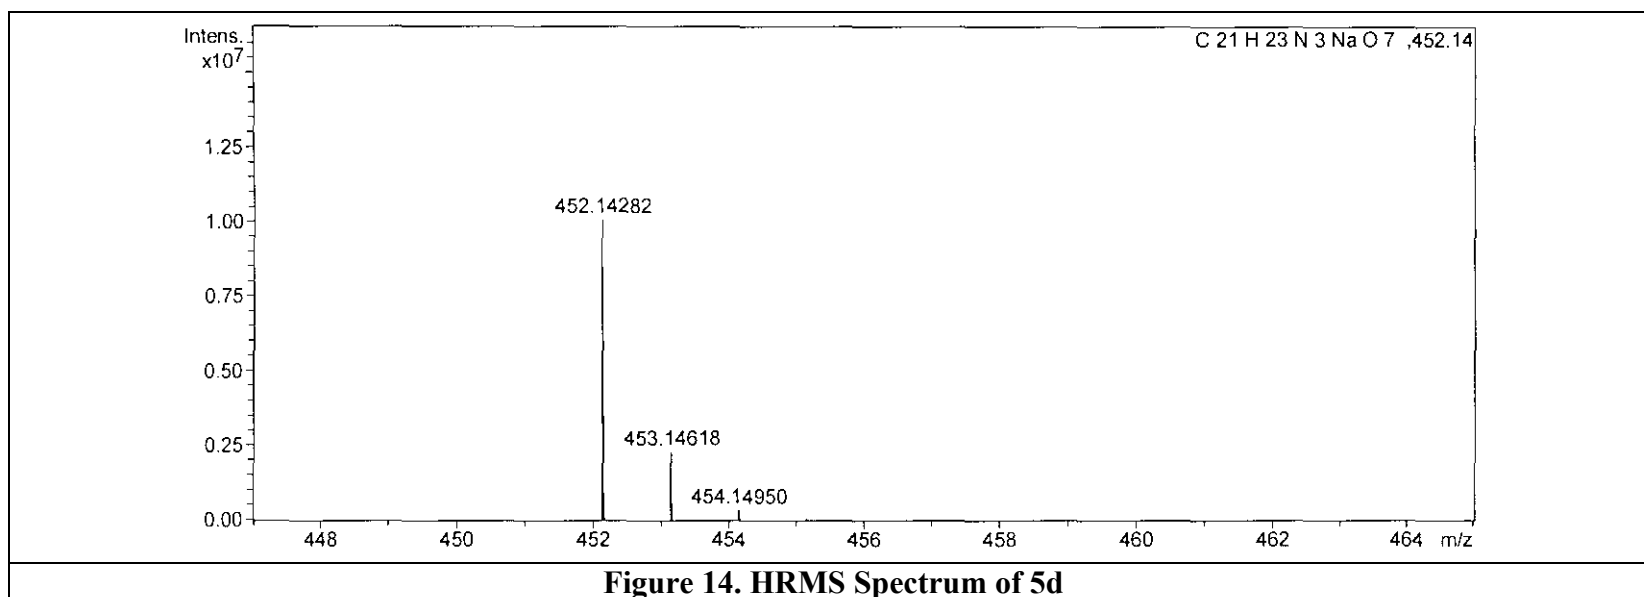

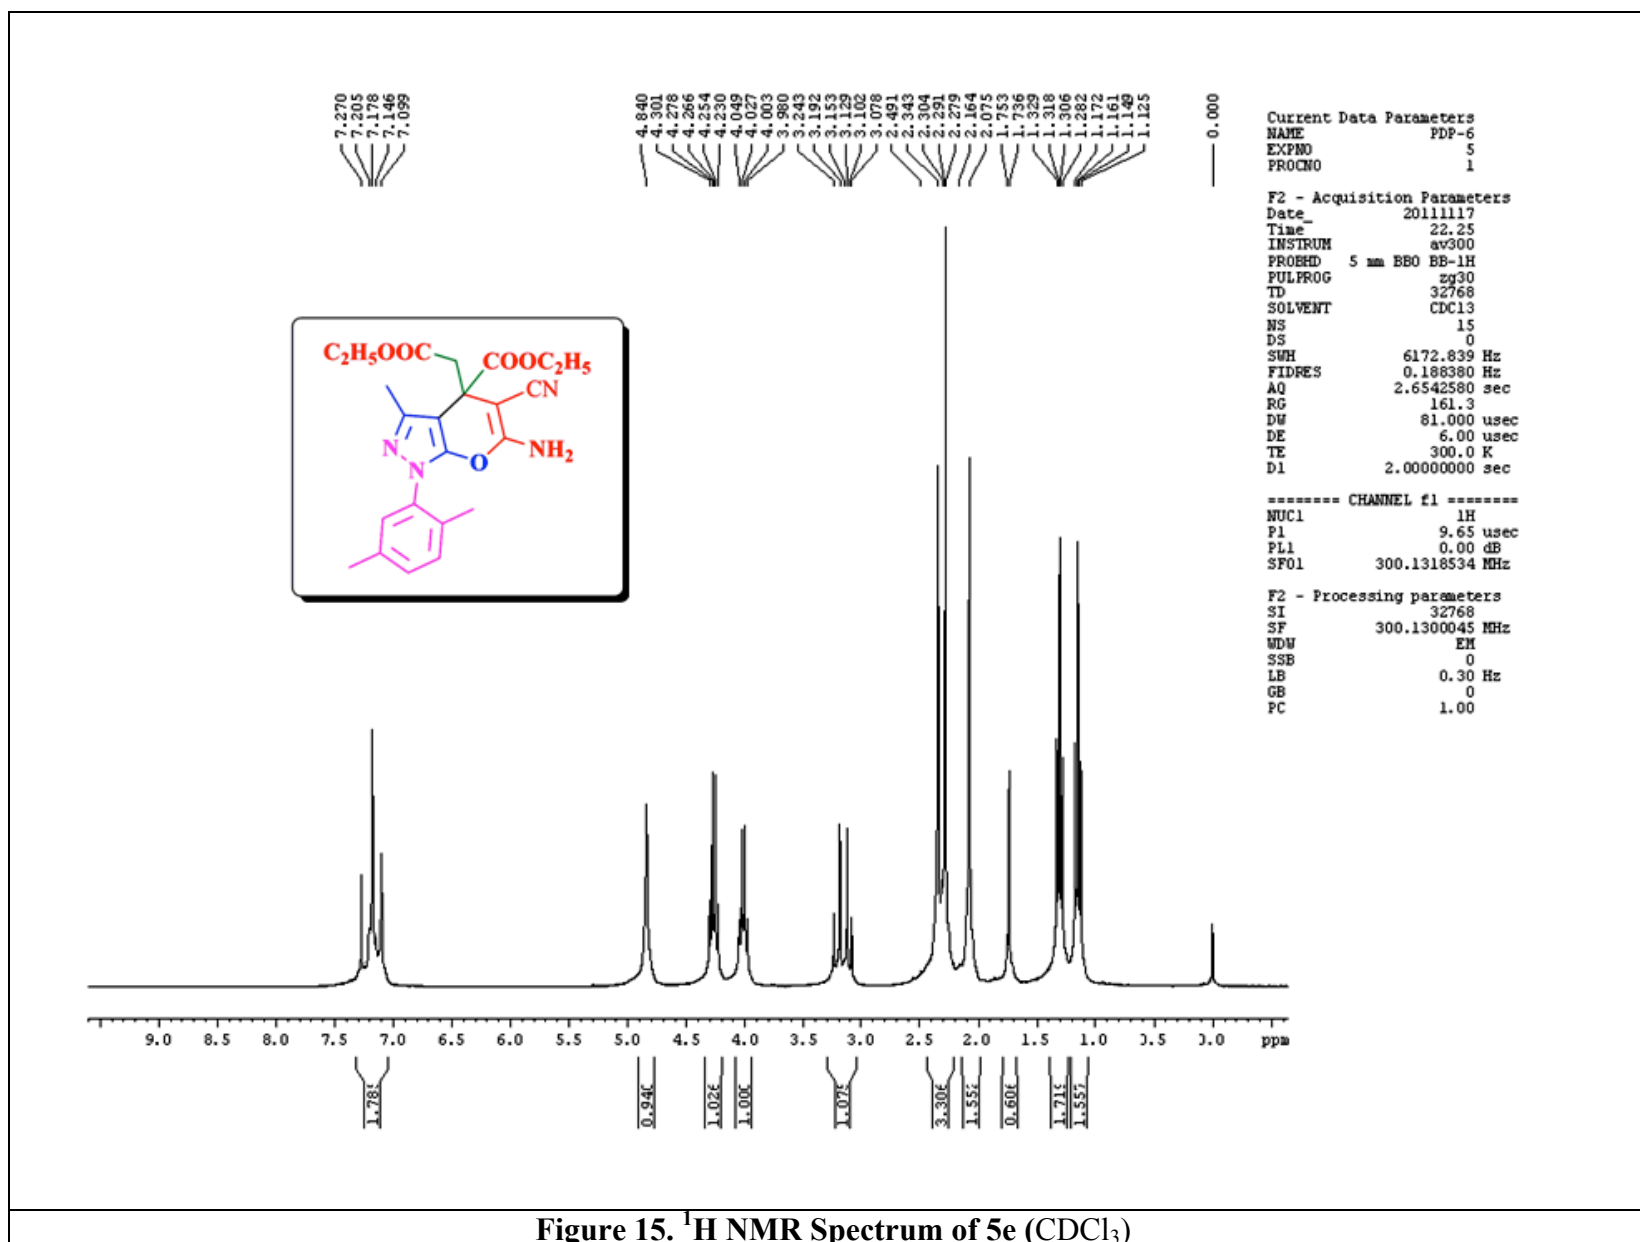

Figure 15. <sup>1</sup>H NMR Spectrum of 5e (CDCl<sub>3</sub>)

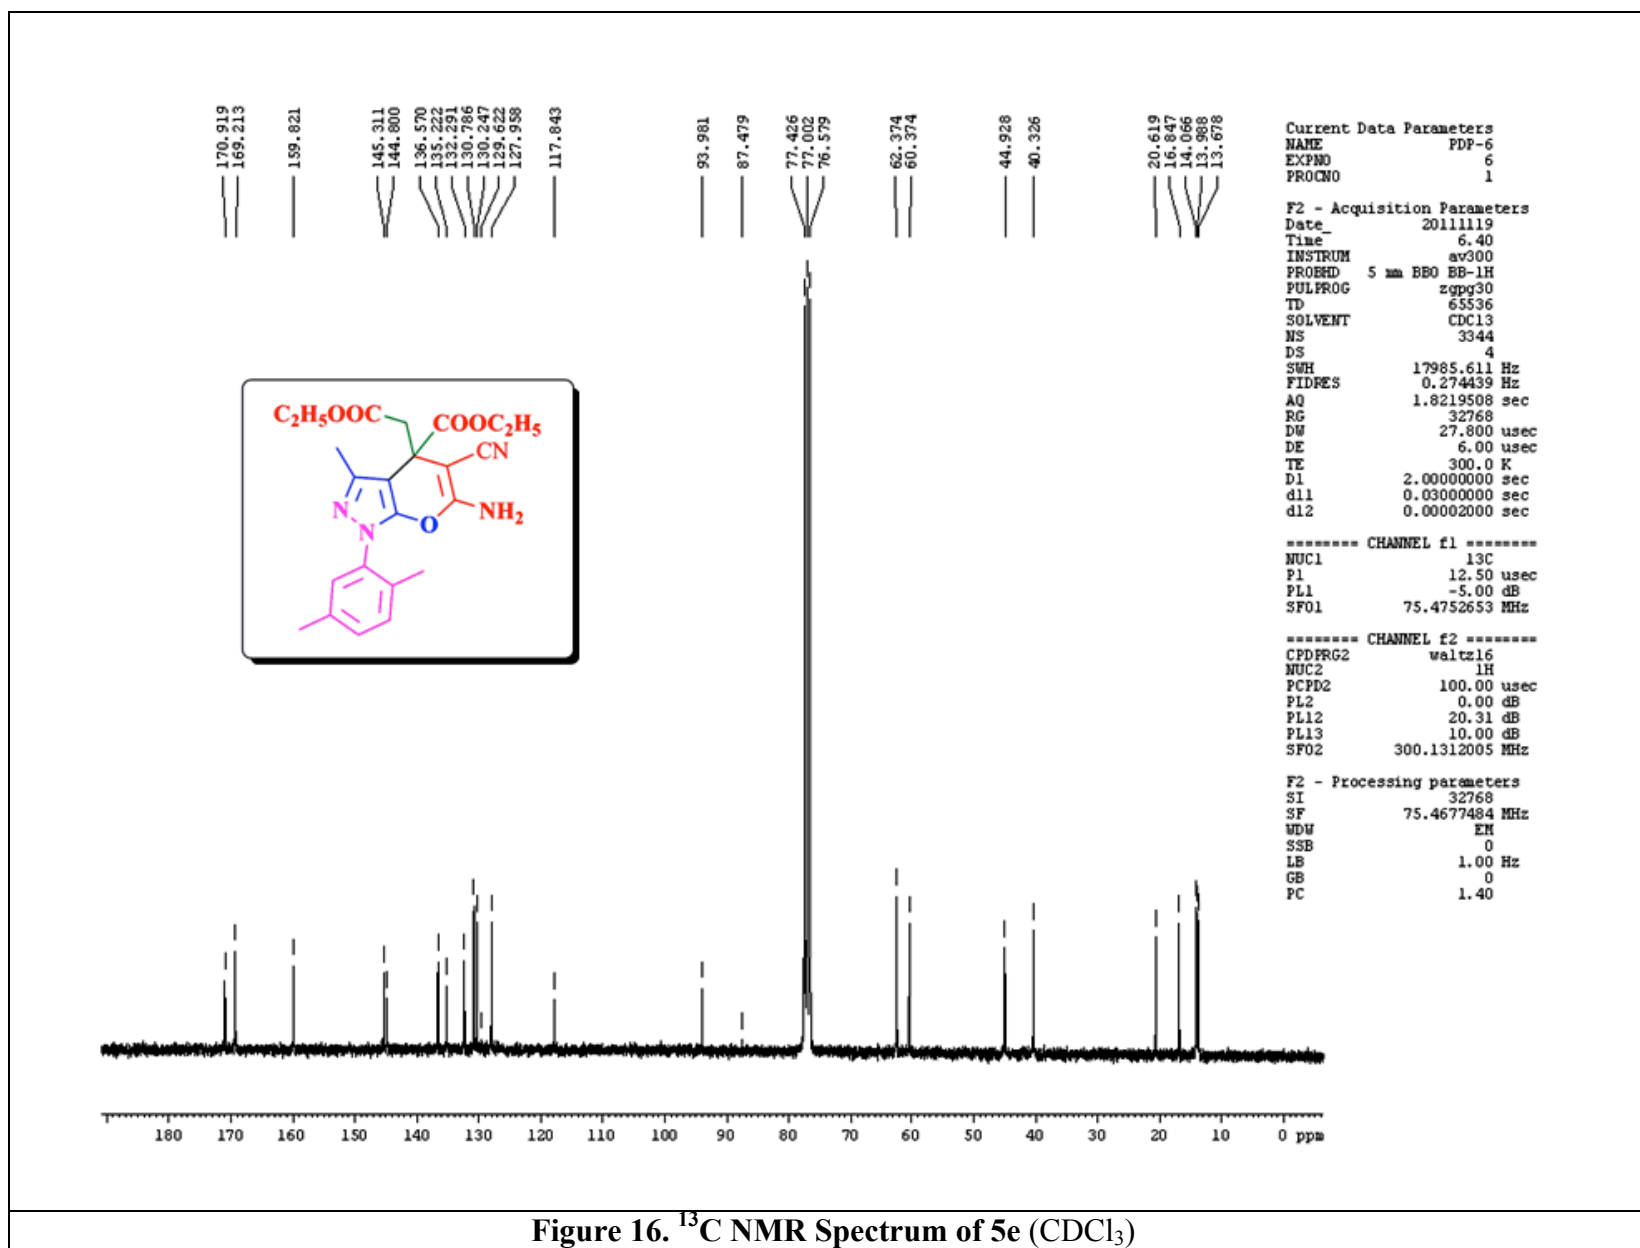

Figure 16. <sup>13</sup>C NMR Spectrum of 5e (CDCl<sub>3</sub>)

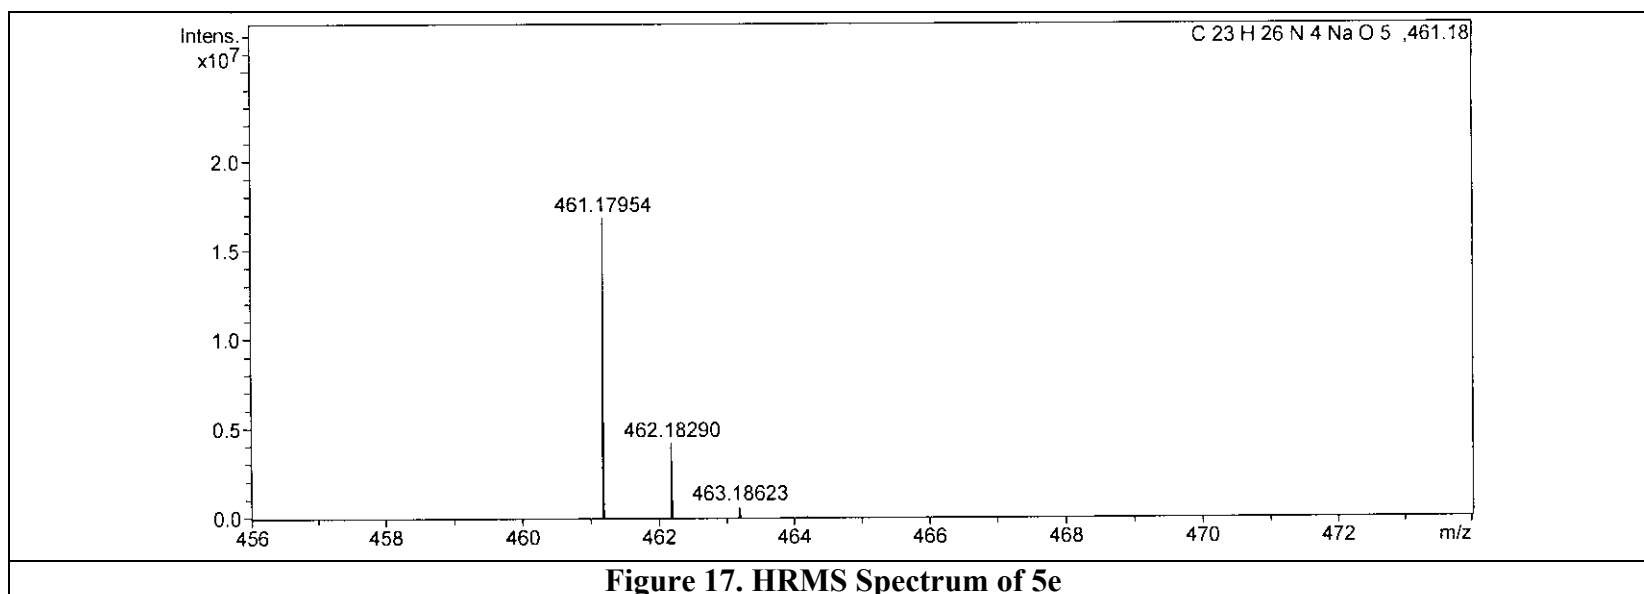



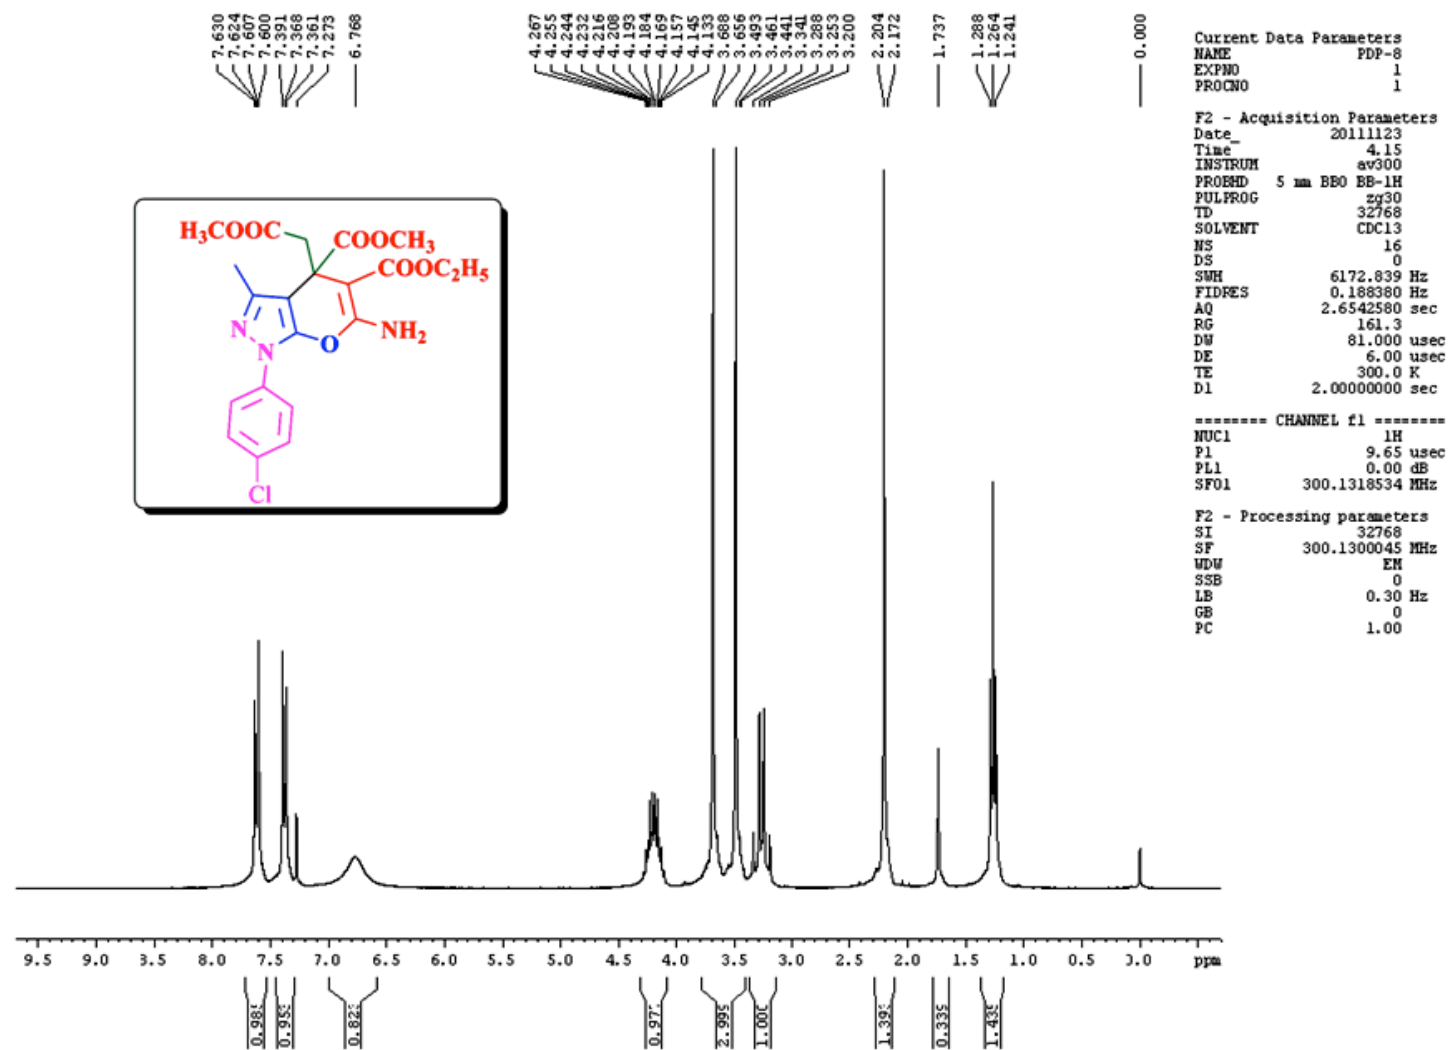

Figure 18. <sup>1</sup>H NMR Spectrum of 5f (CDCl<sub>3</sub>)

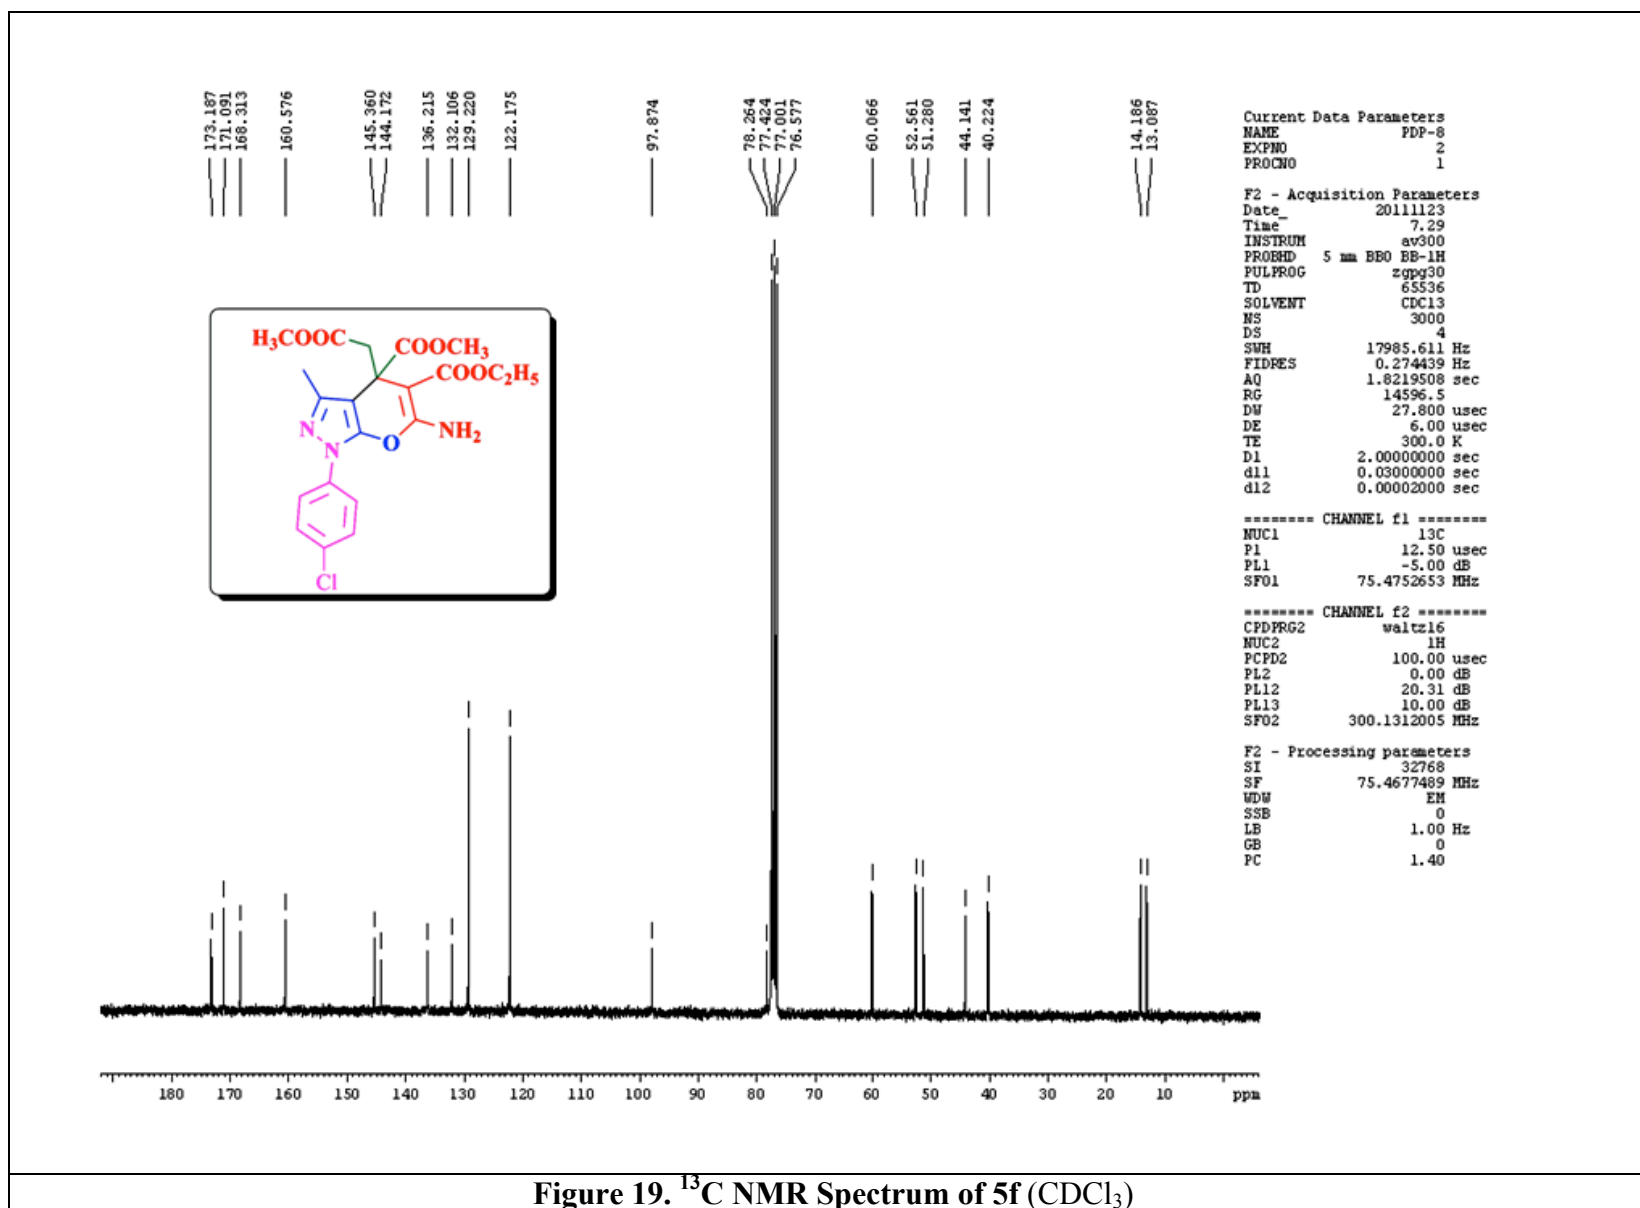

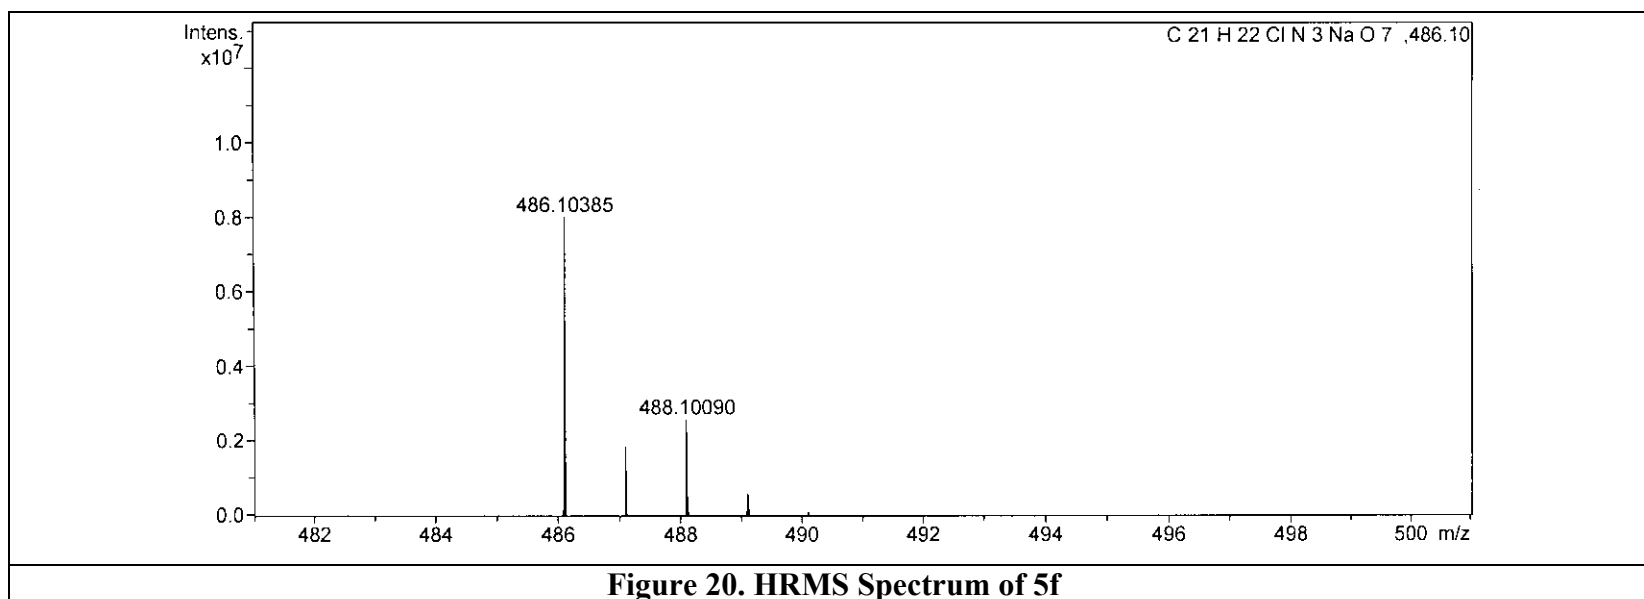

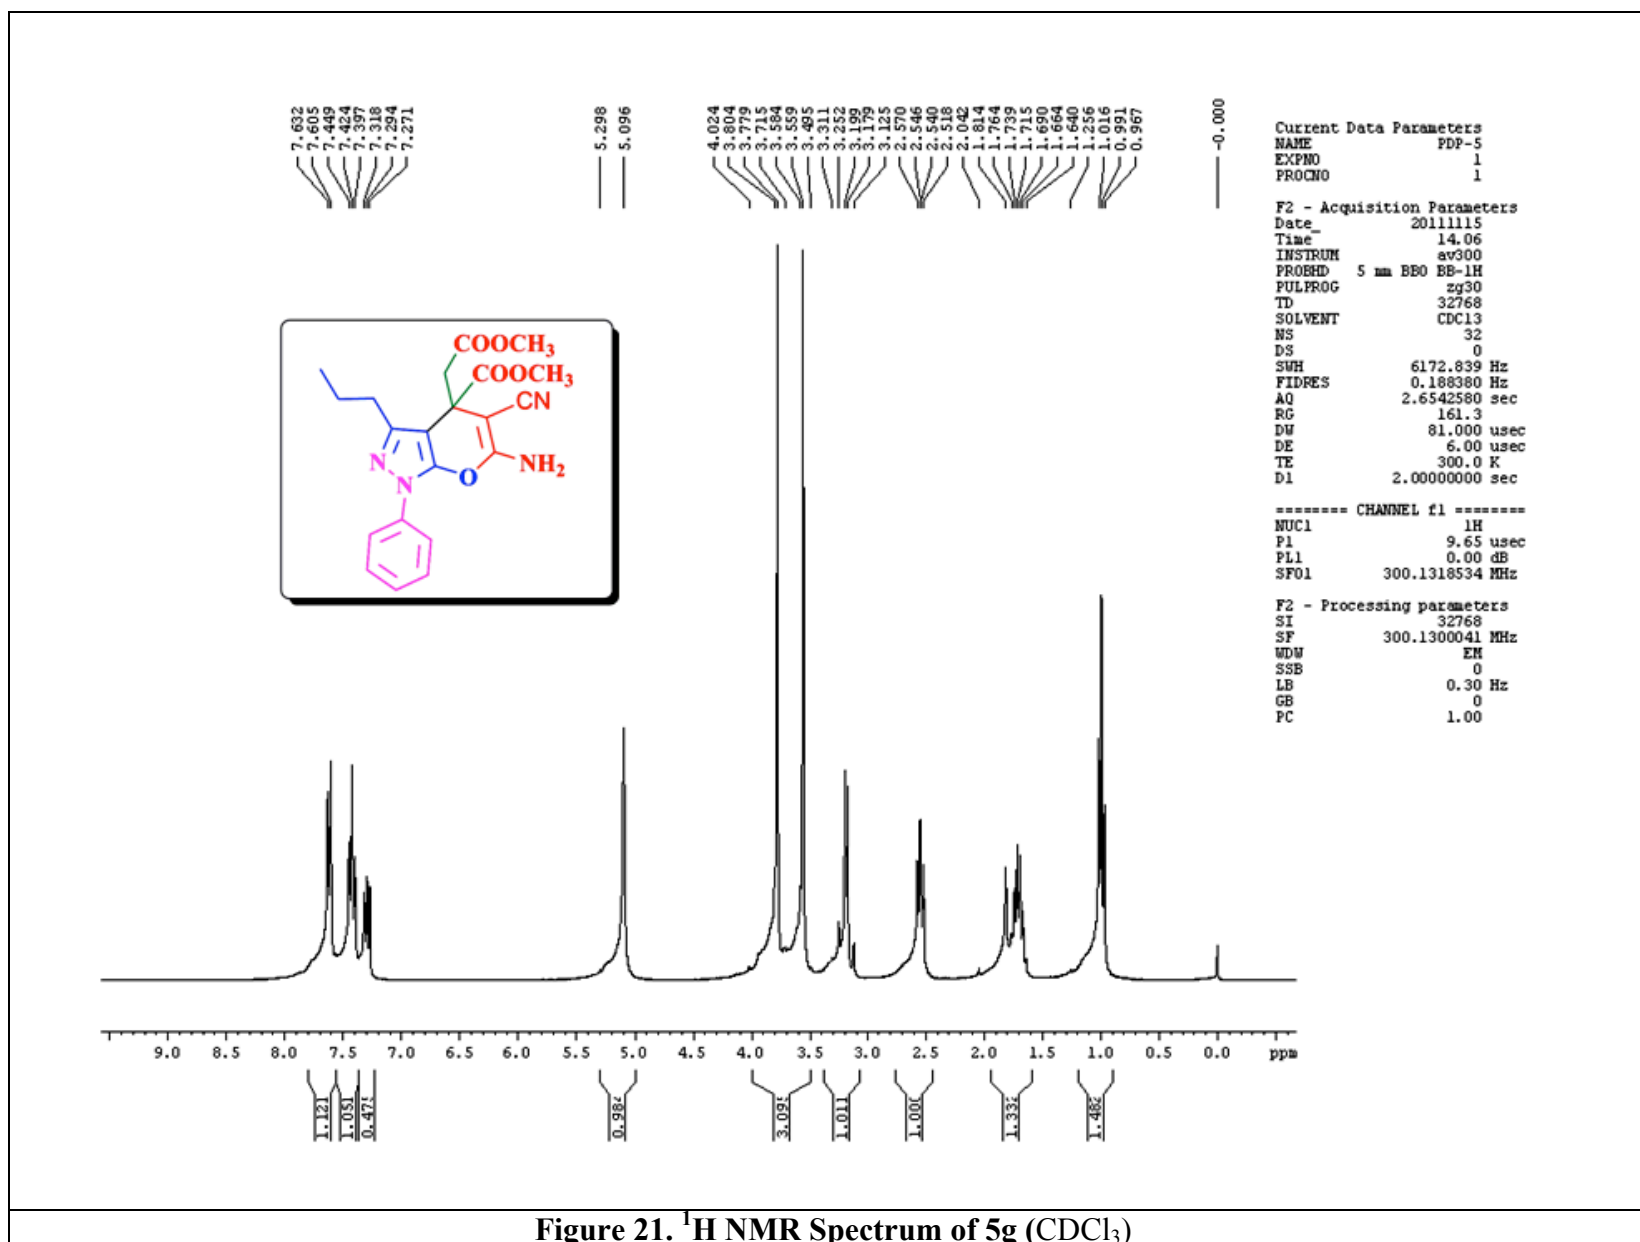

Figure 21. <sup>1</sup>H NMR Spectrum of 5g (CDCl<sub>3</sub>)

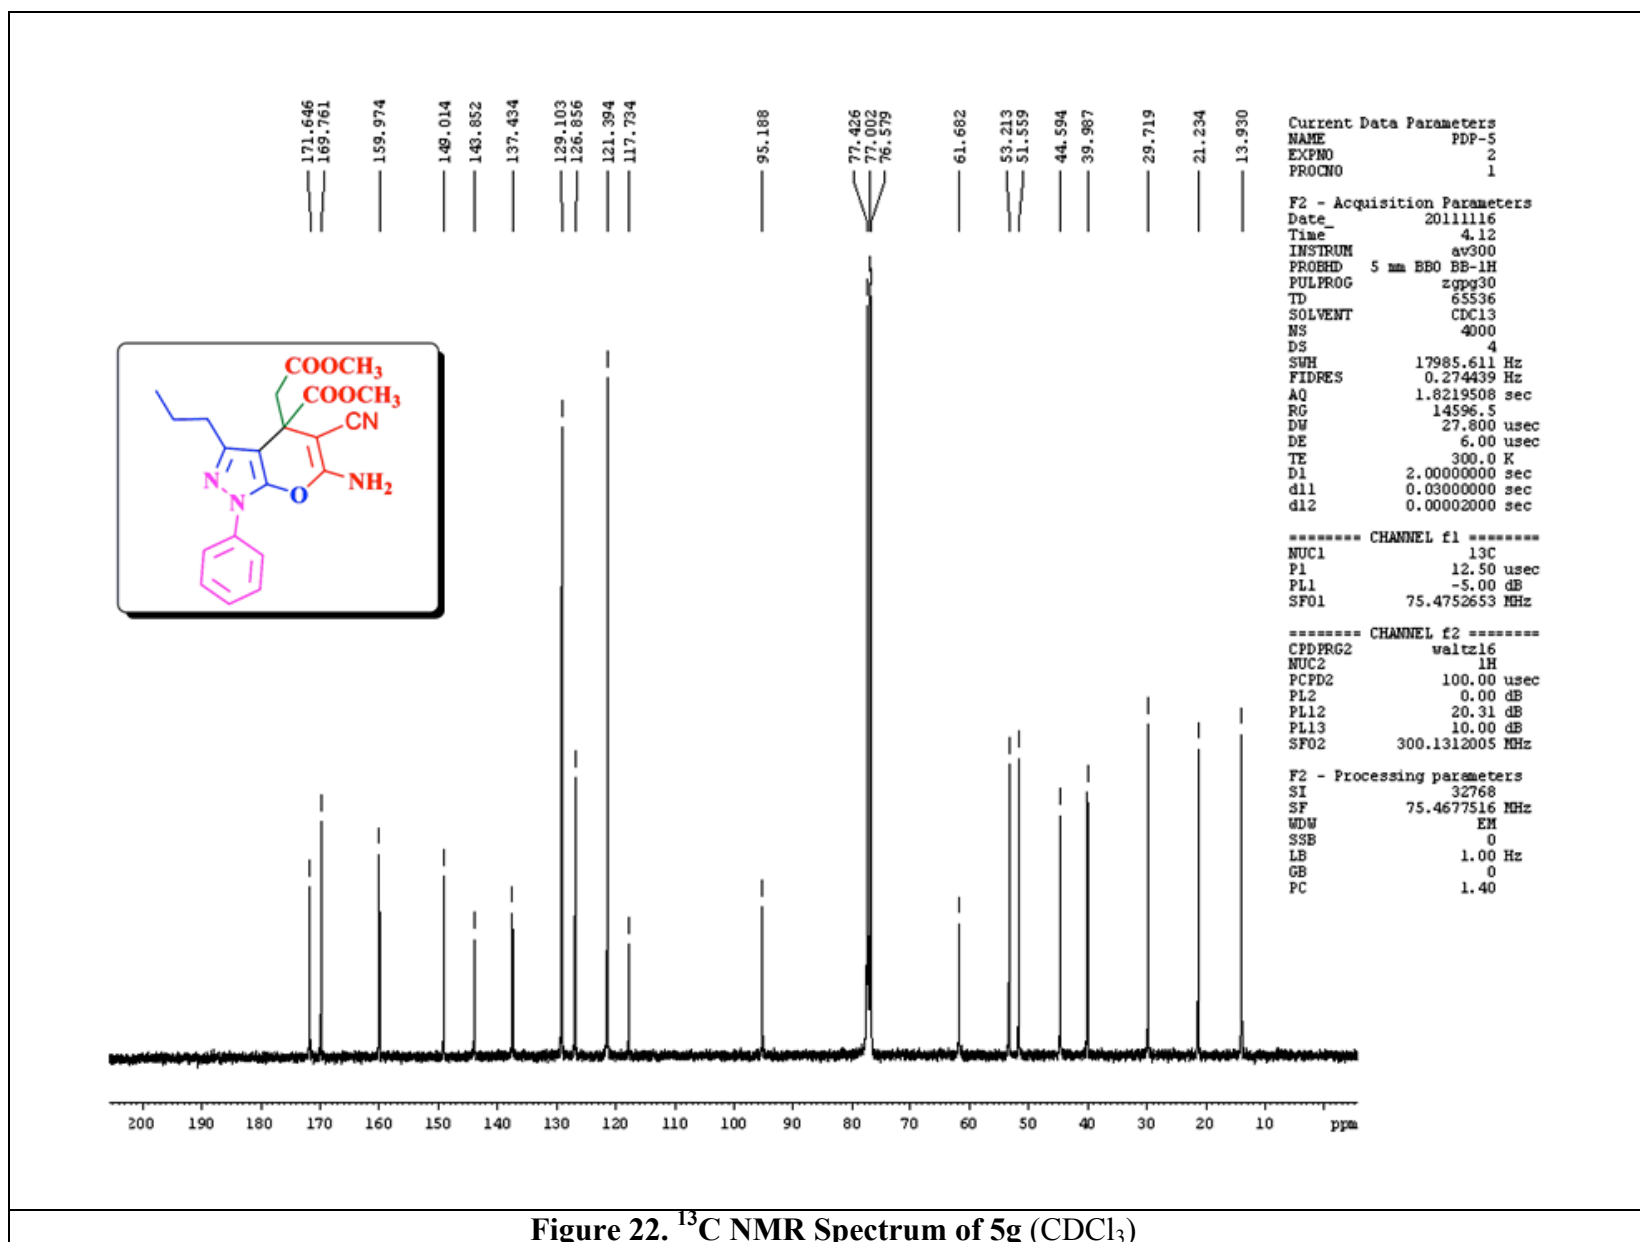

Figure 22. <sup>13</sup>C NMR Spectrum of 5g (CDCl<sub>3</sub>)

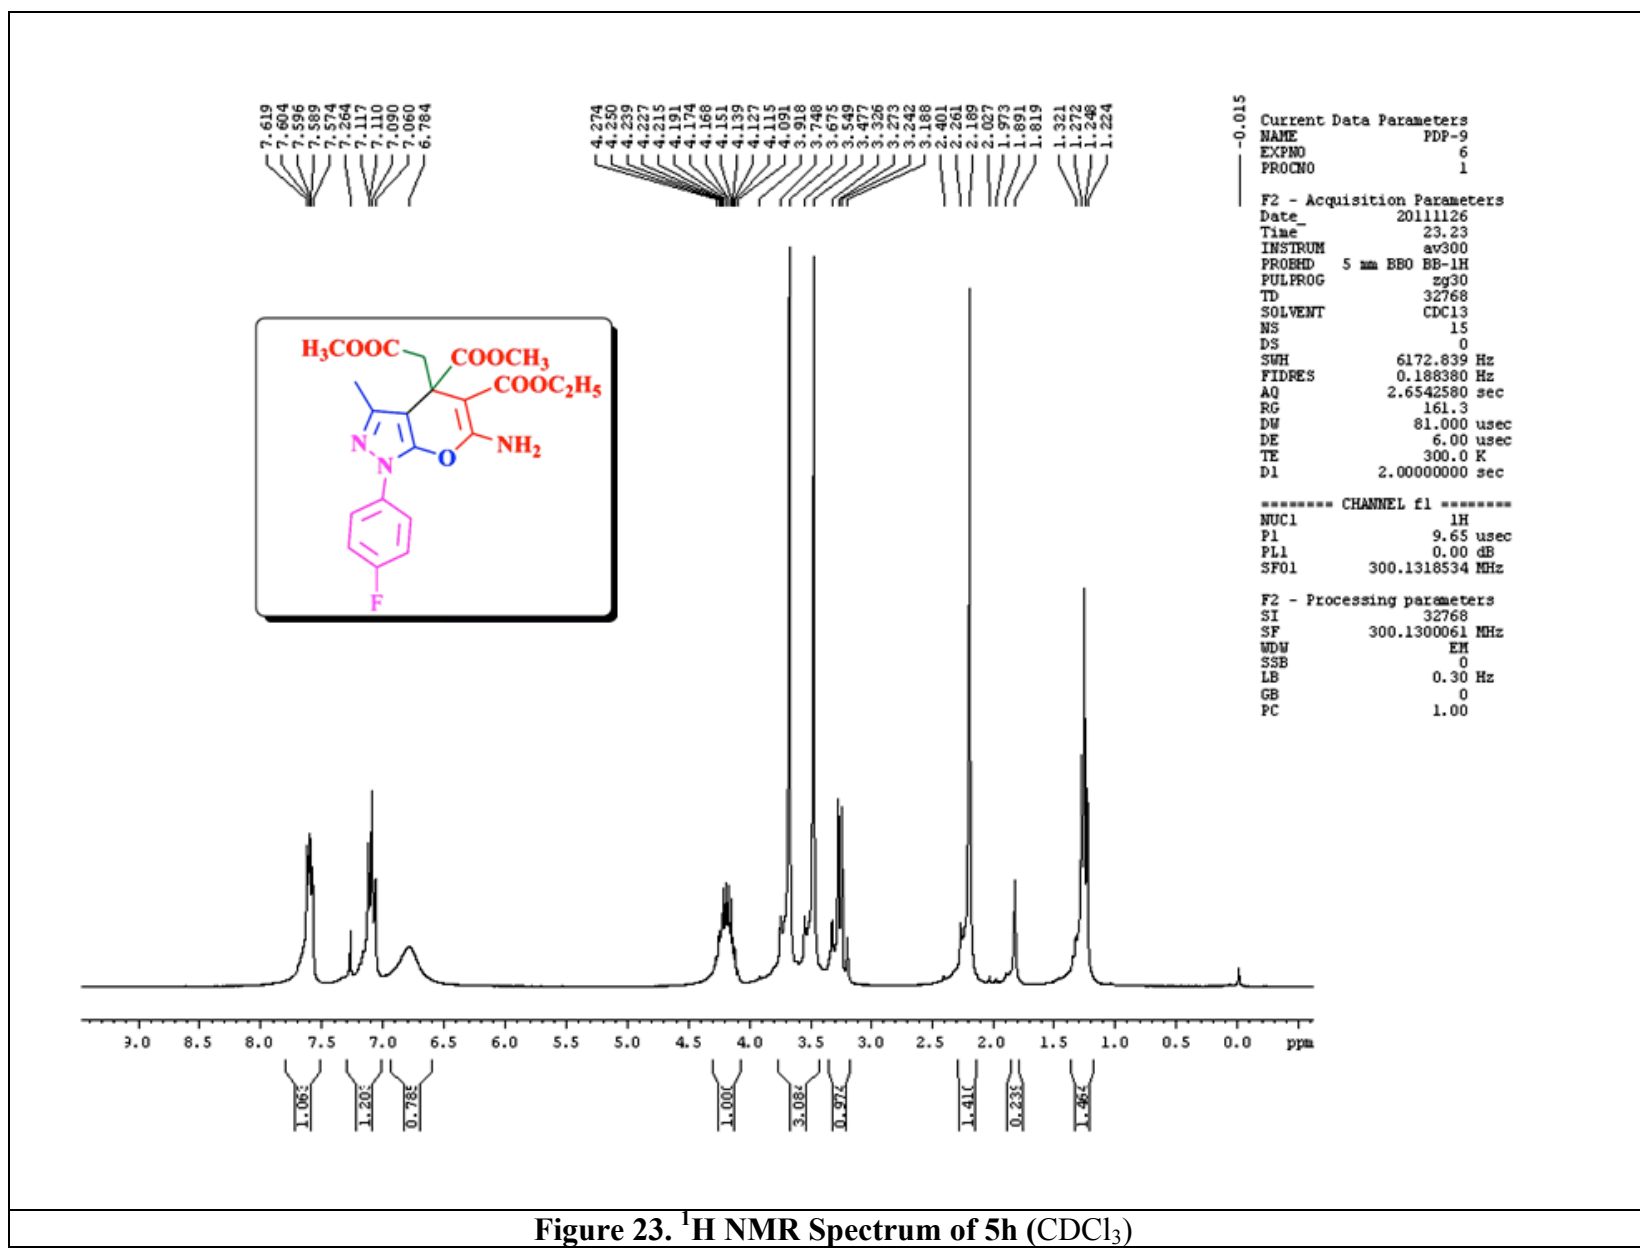

Figure 23. <sup>1</sup>H NMR Spectrum of 5h (CDCl<sub>3</sub>)

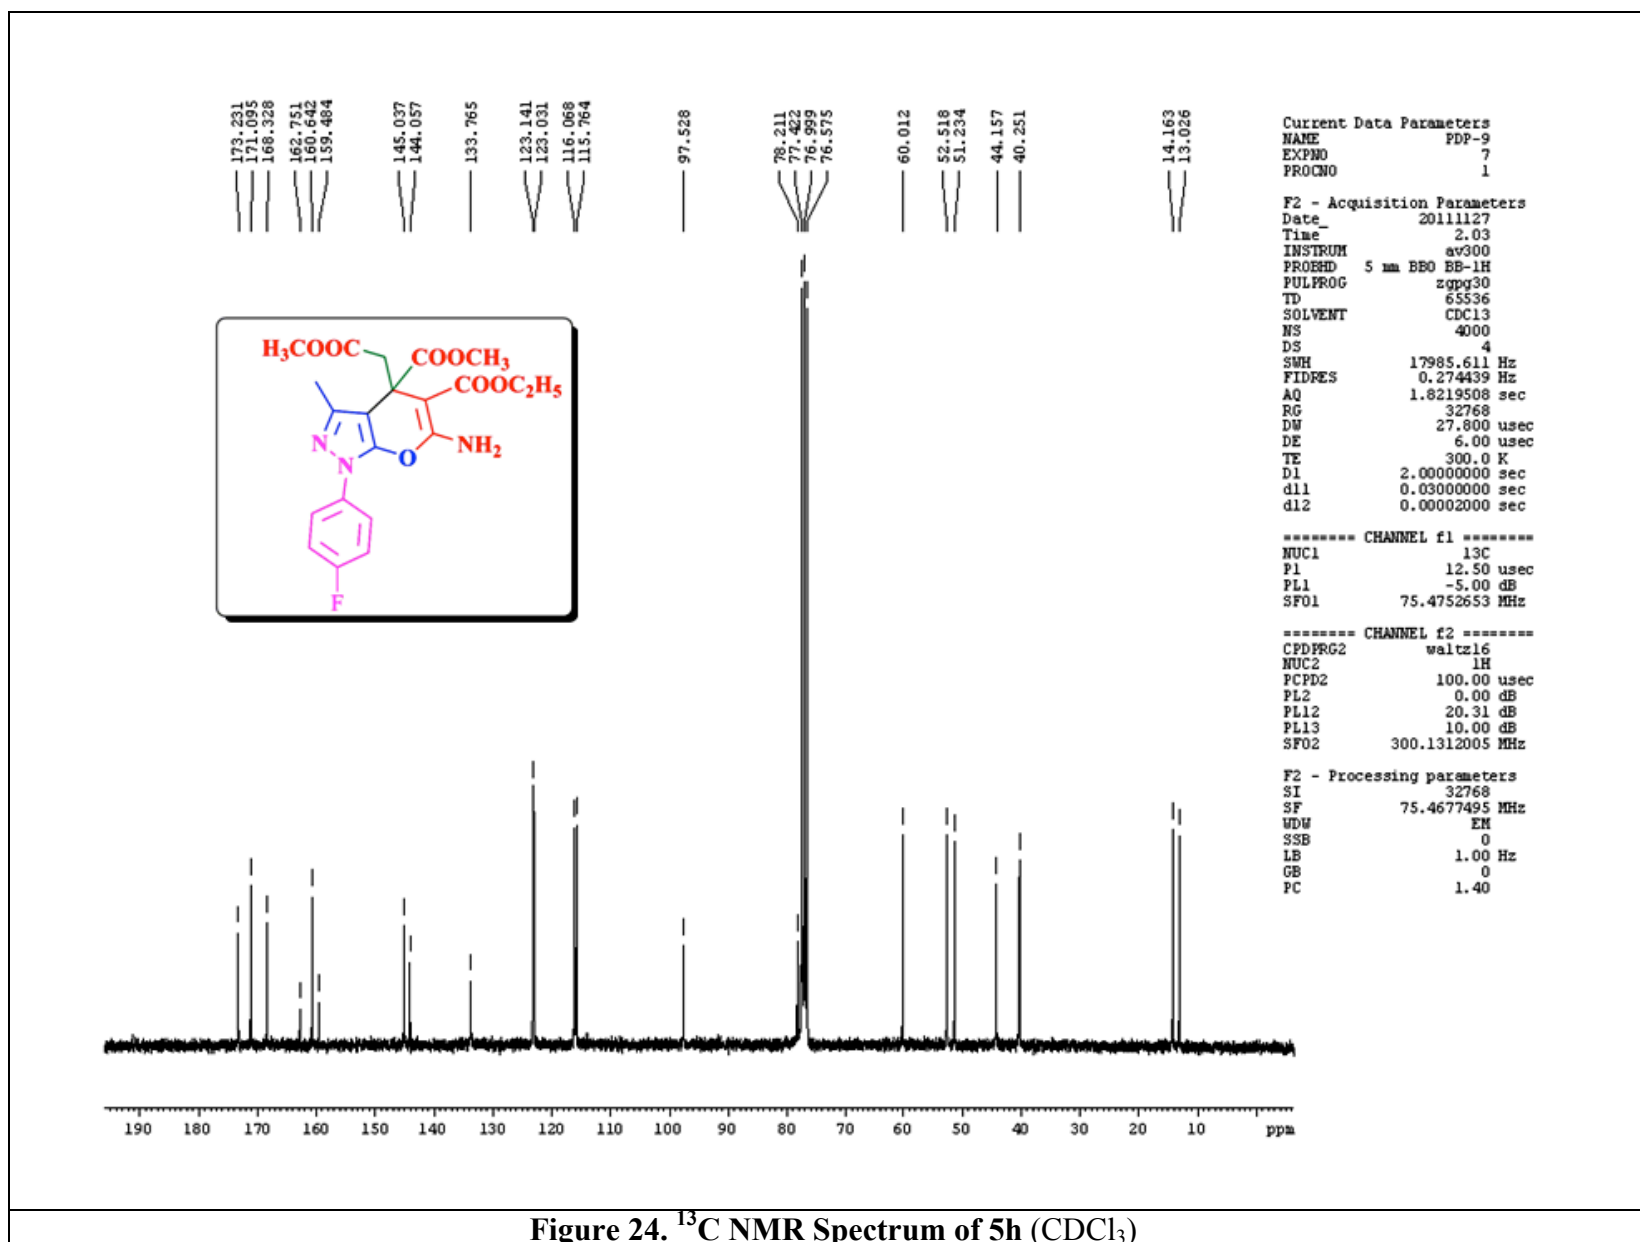

Figure 24. <sup>13</sup>C NMR Spectrum of 5h (CDCl<sub>3</sub>)

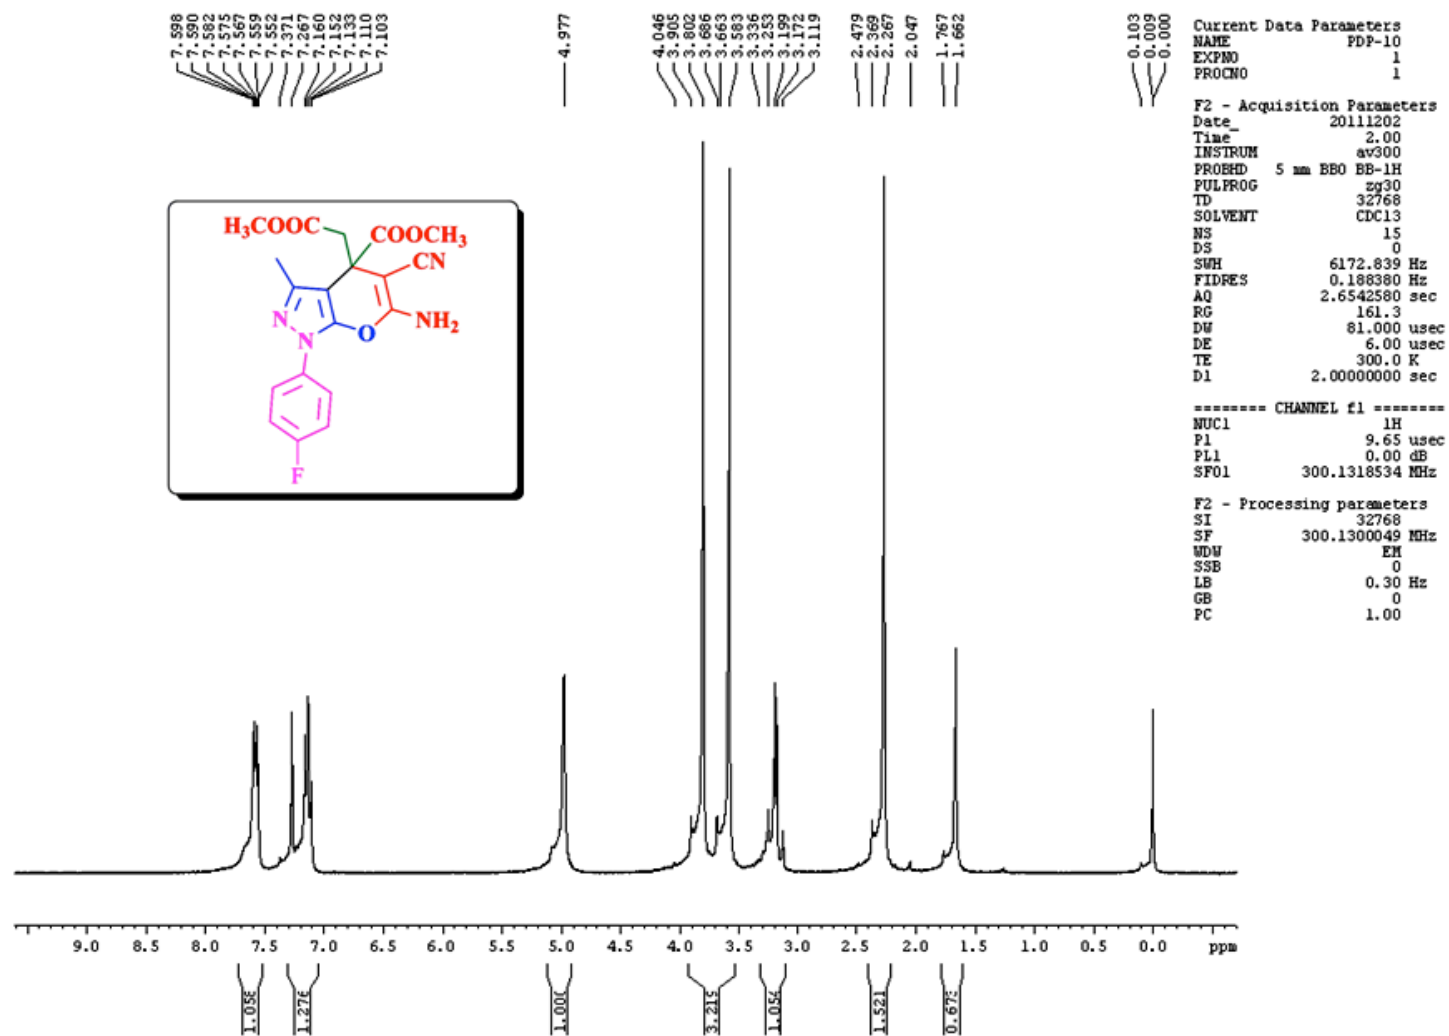

Figure 25. <sup>1</sup>H NMR Spectrum of 5i (CDCl<sub>3</sub>)



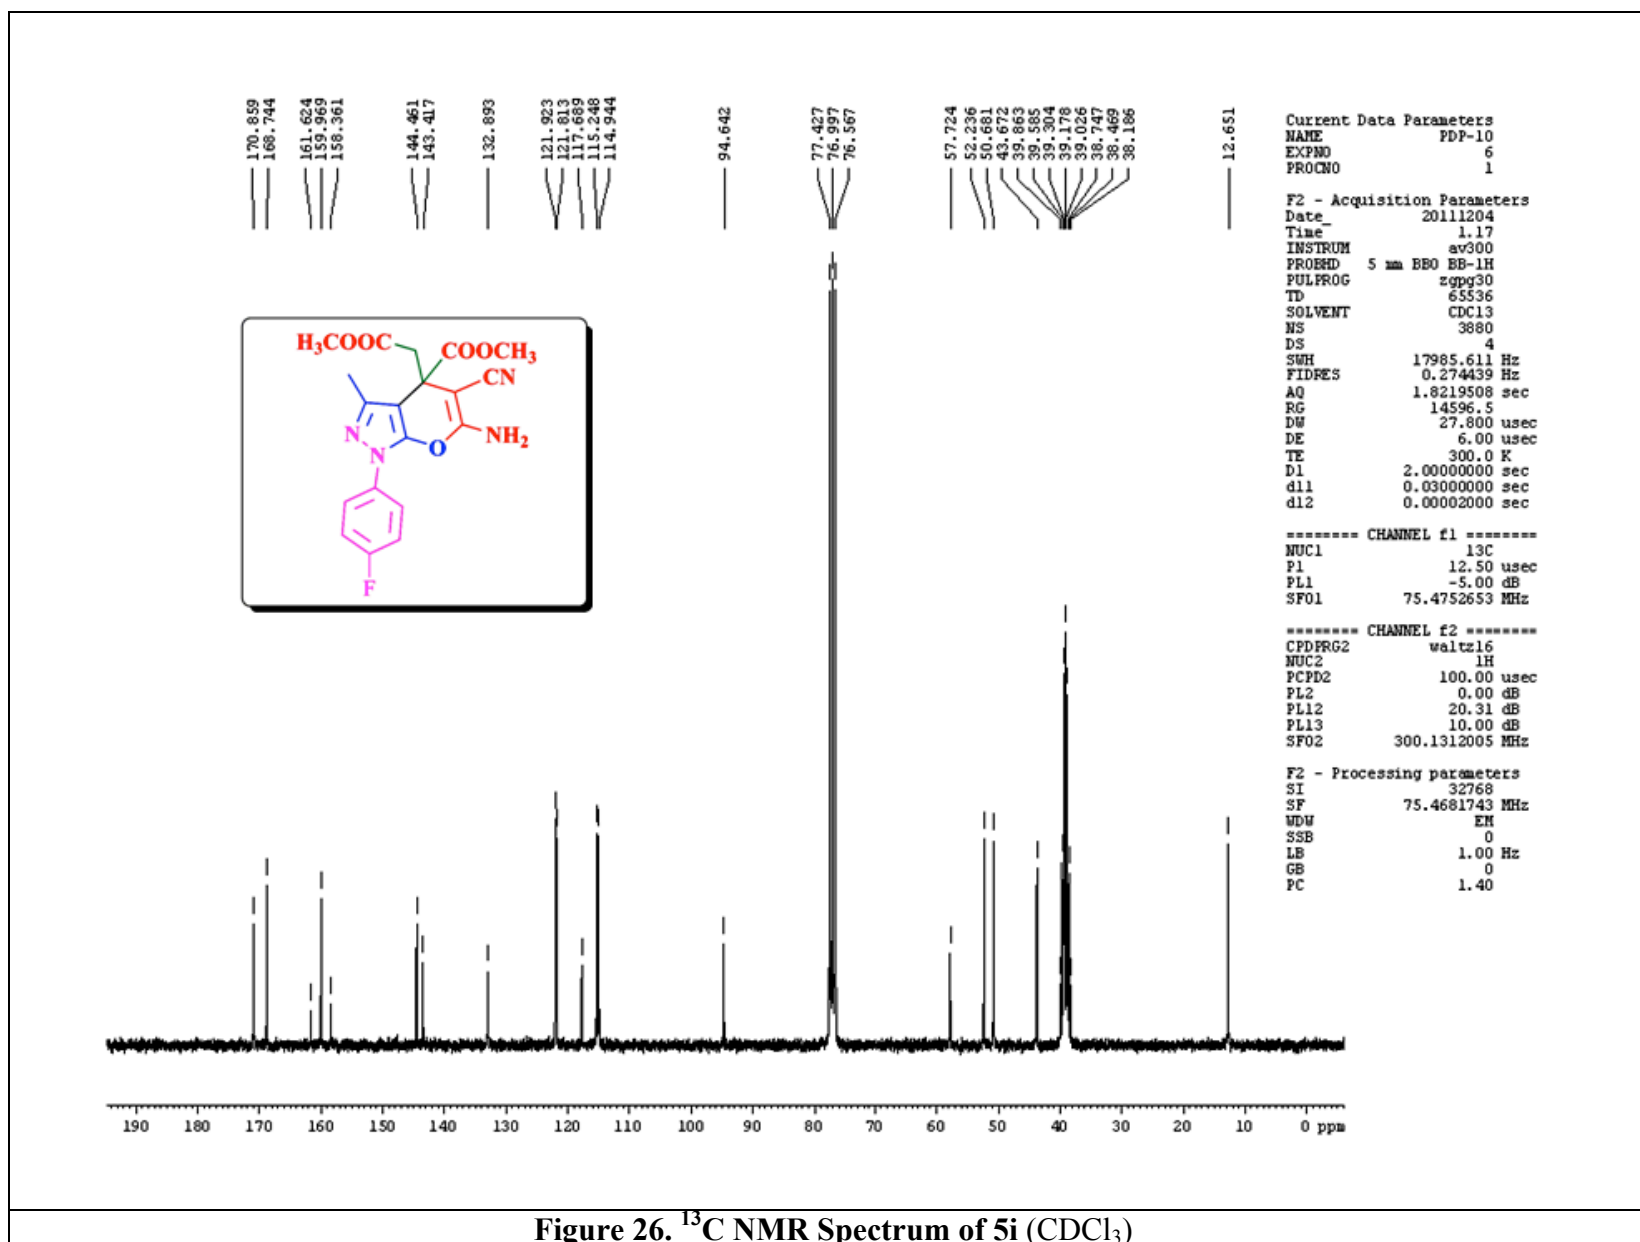

Figure 26. <sup>13</sup>C NMR Spectrum of 5i (CDCl<sub>3</sub>)

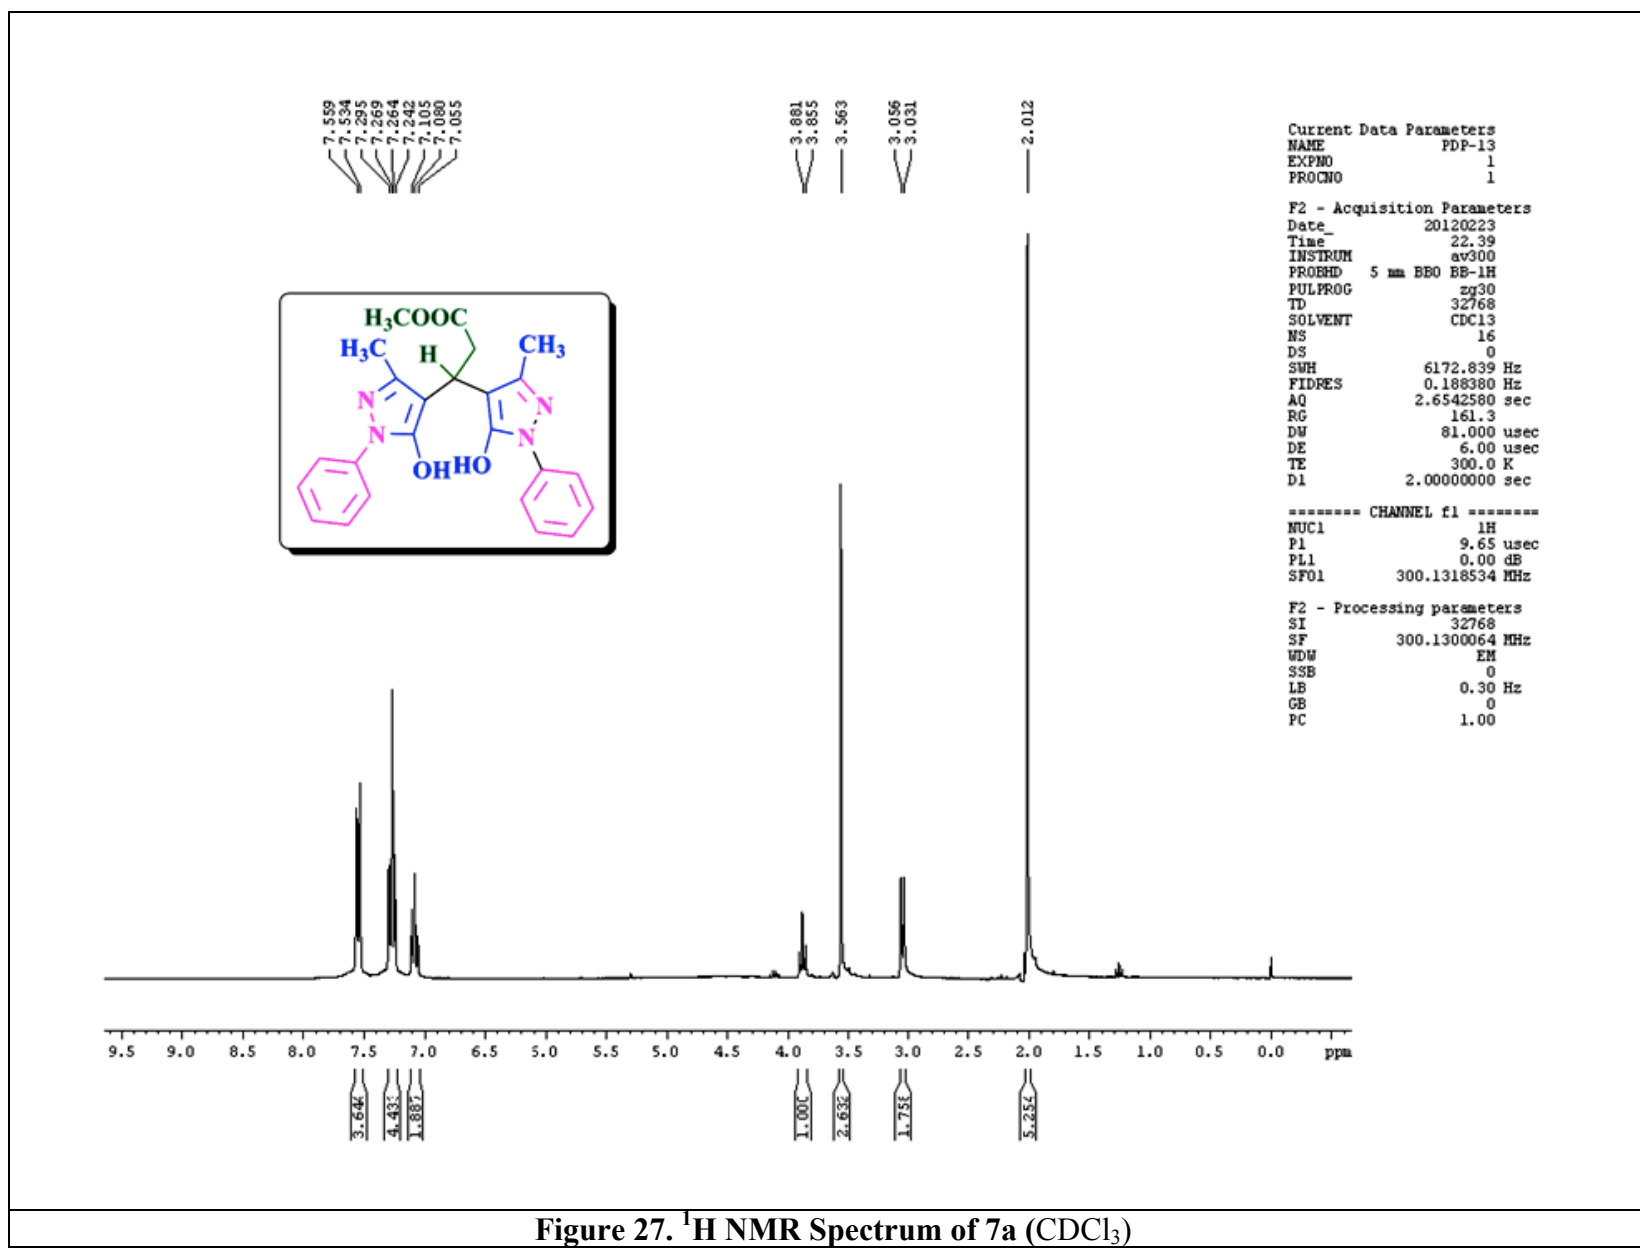

Figure 27. <sup>1</sup>H NMR Spectrum of 7a (CDCl<sub>3</sub>)

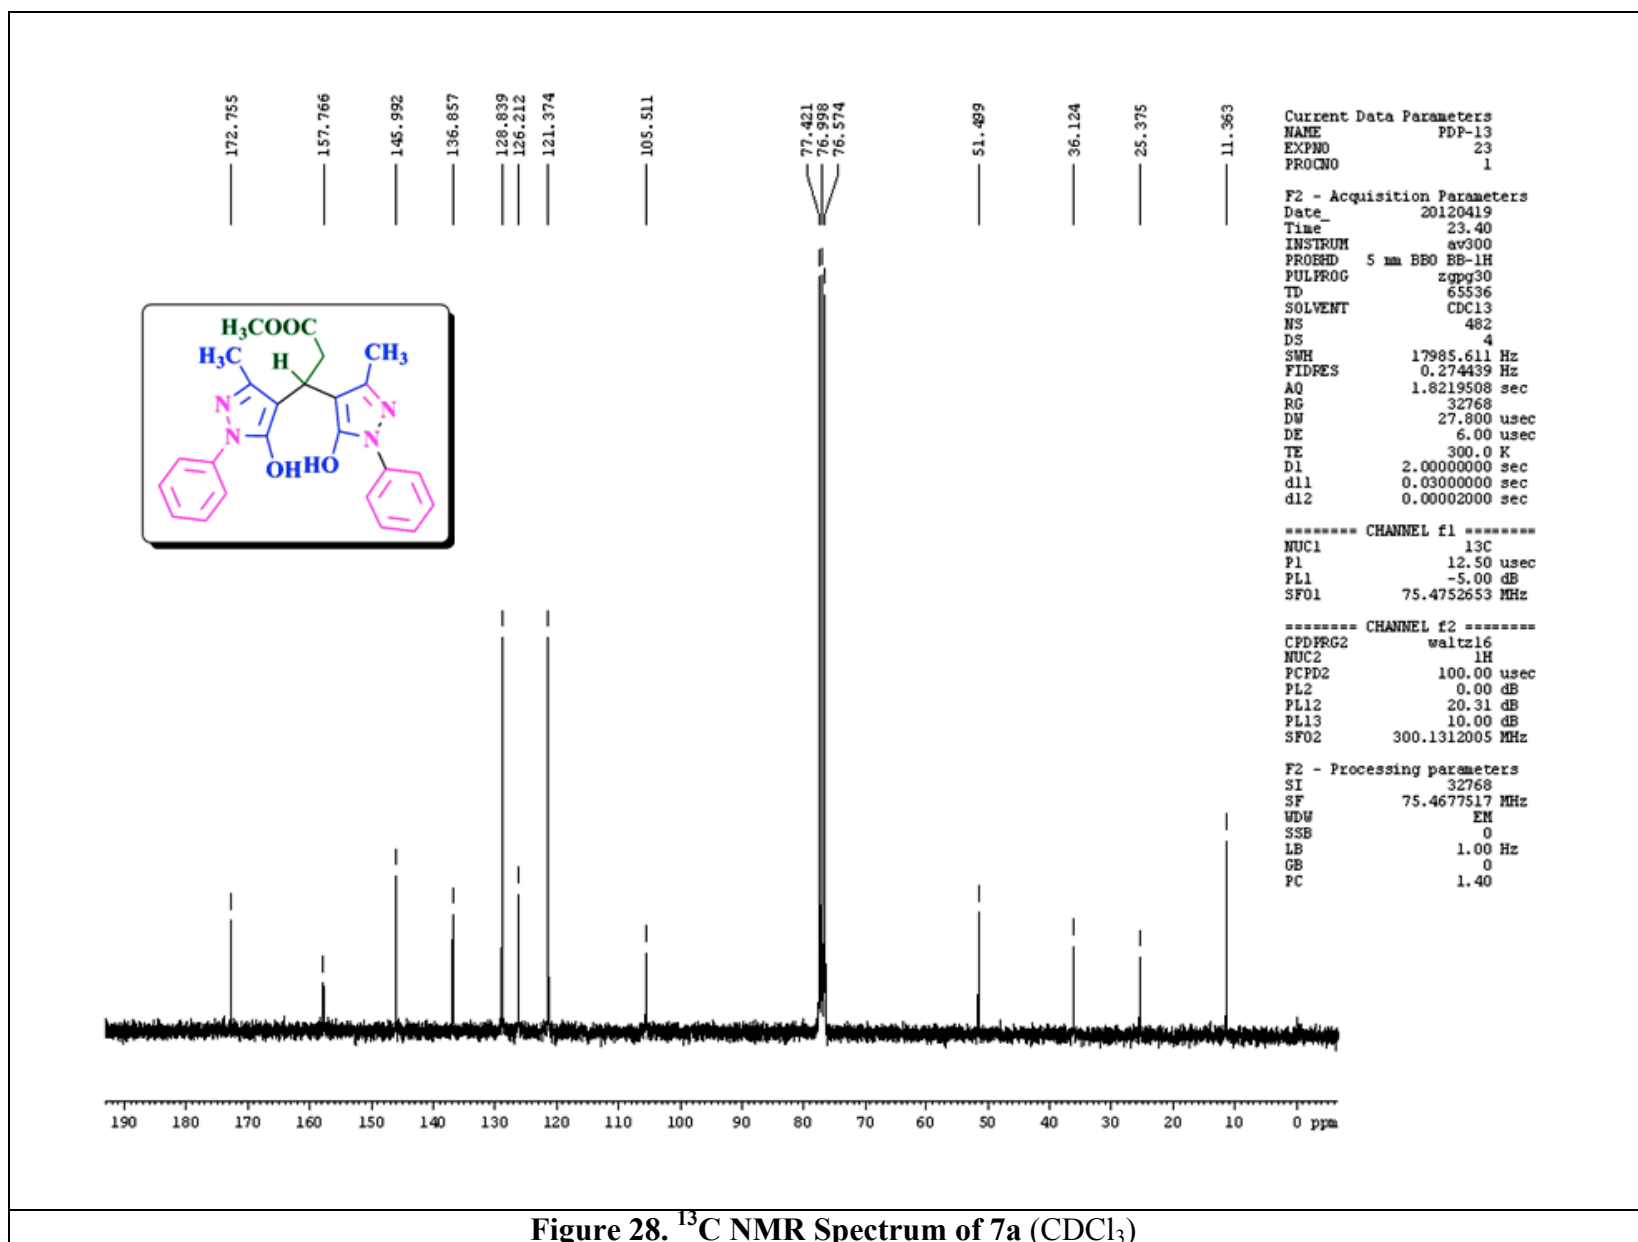

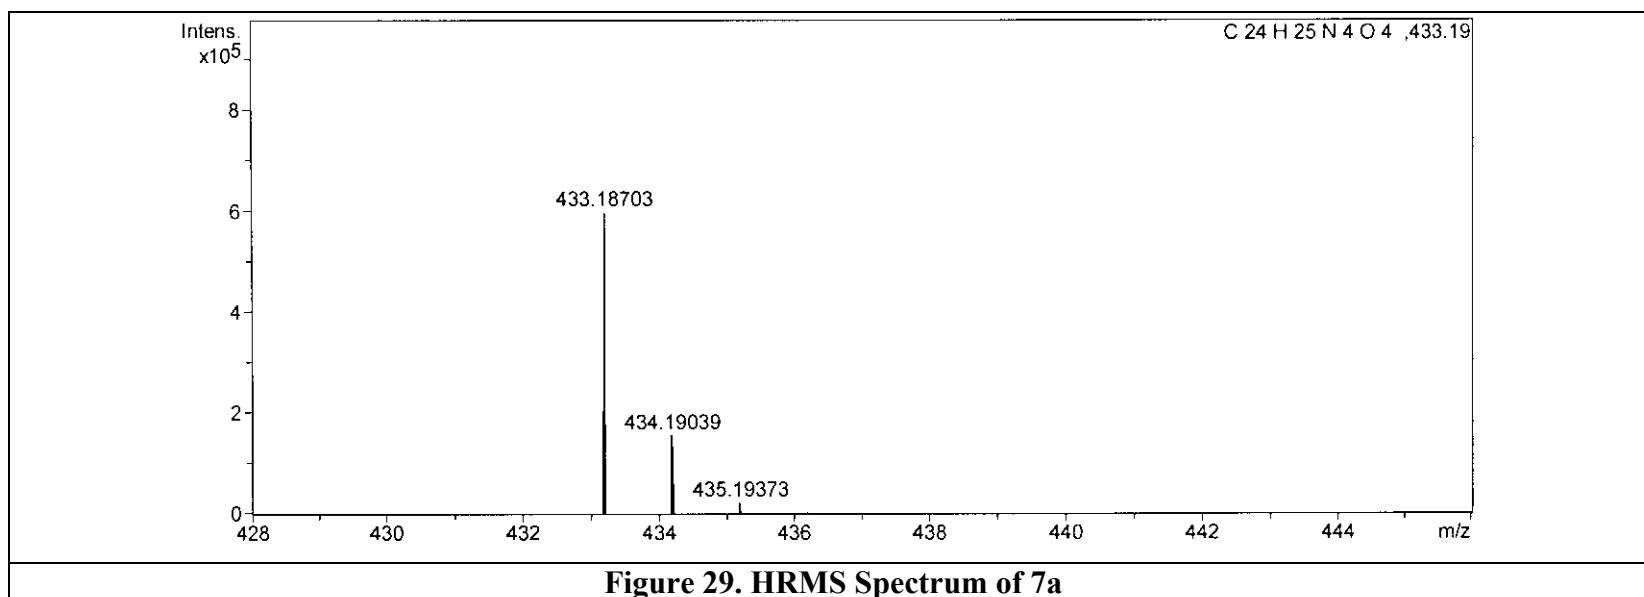

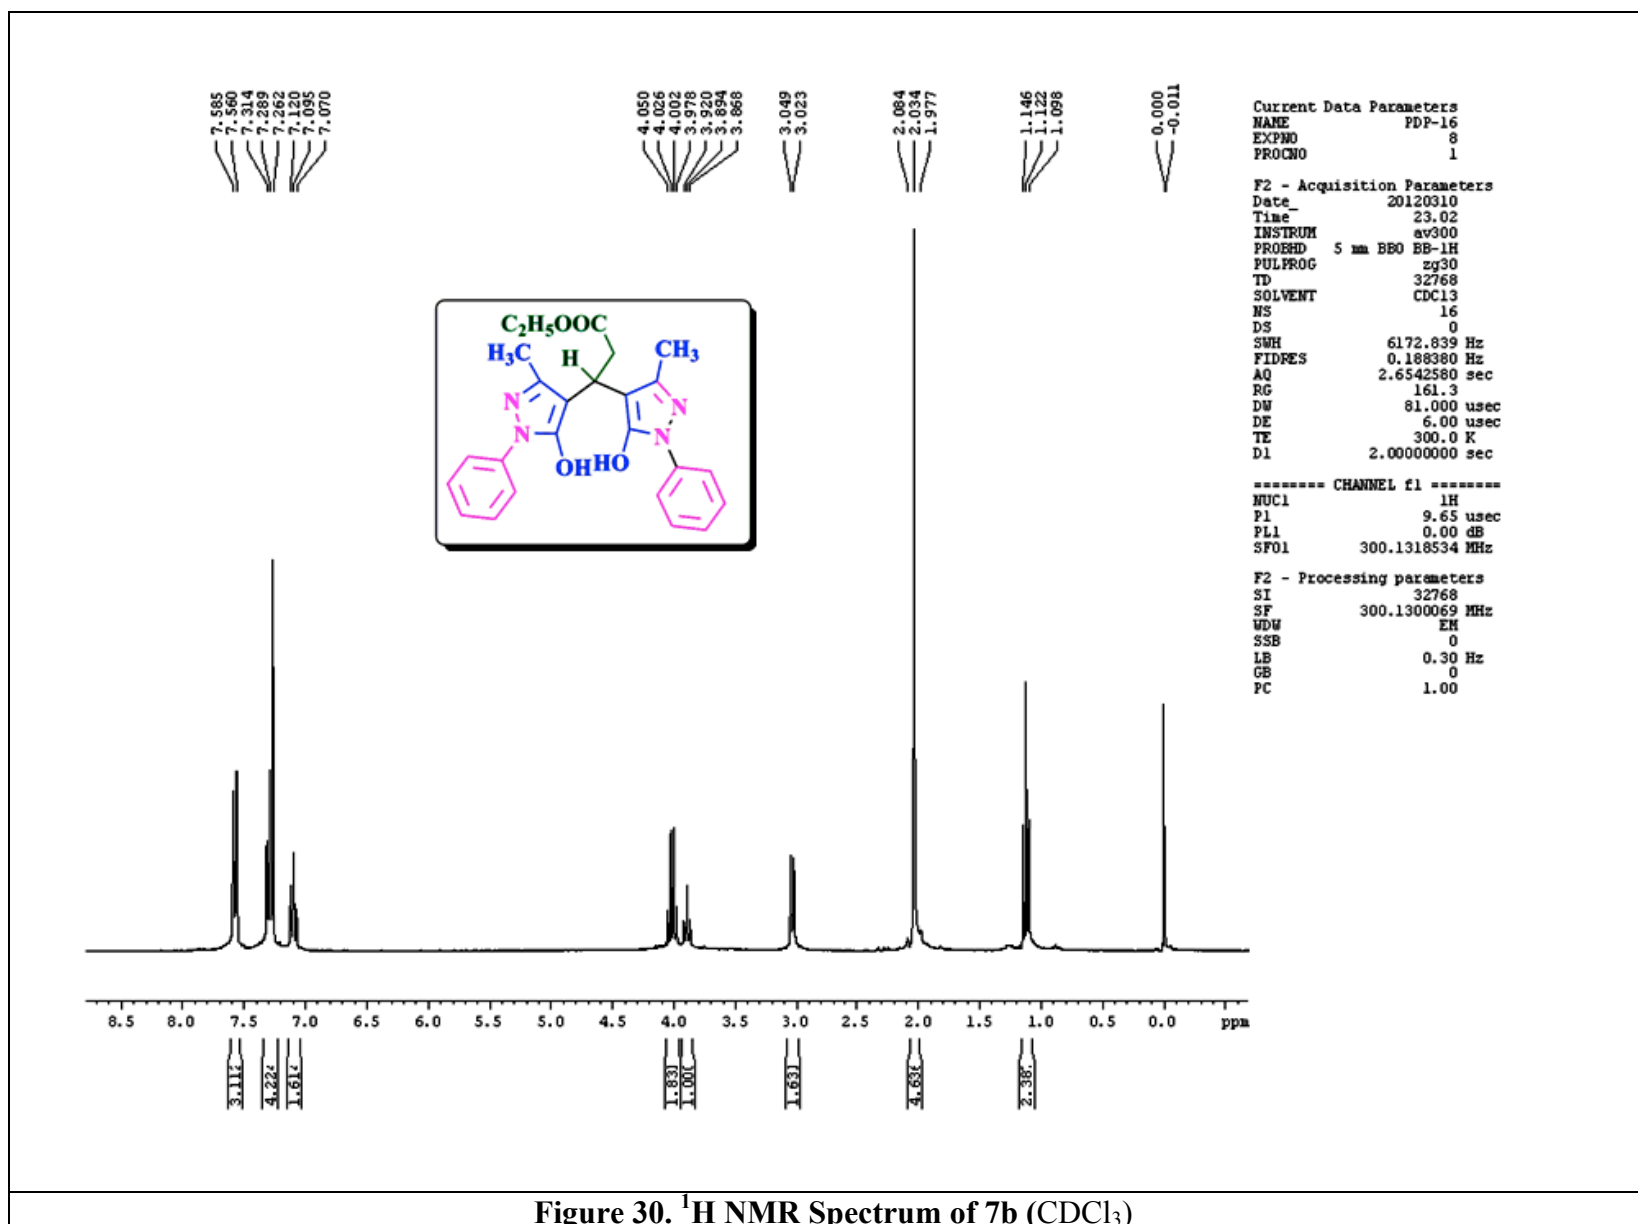

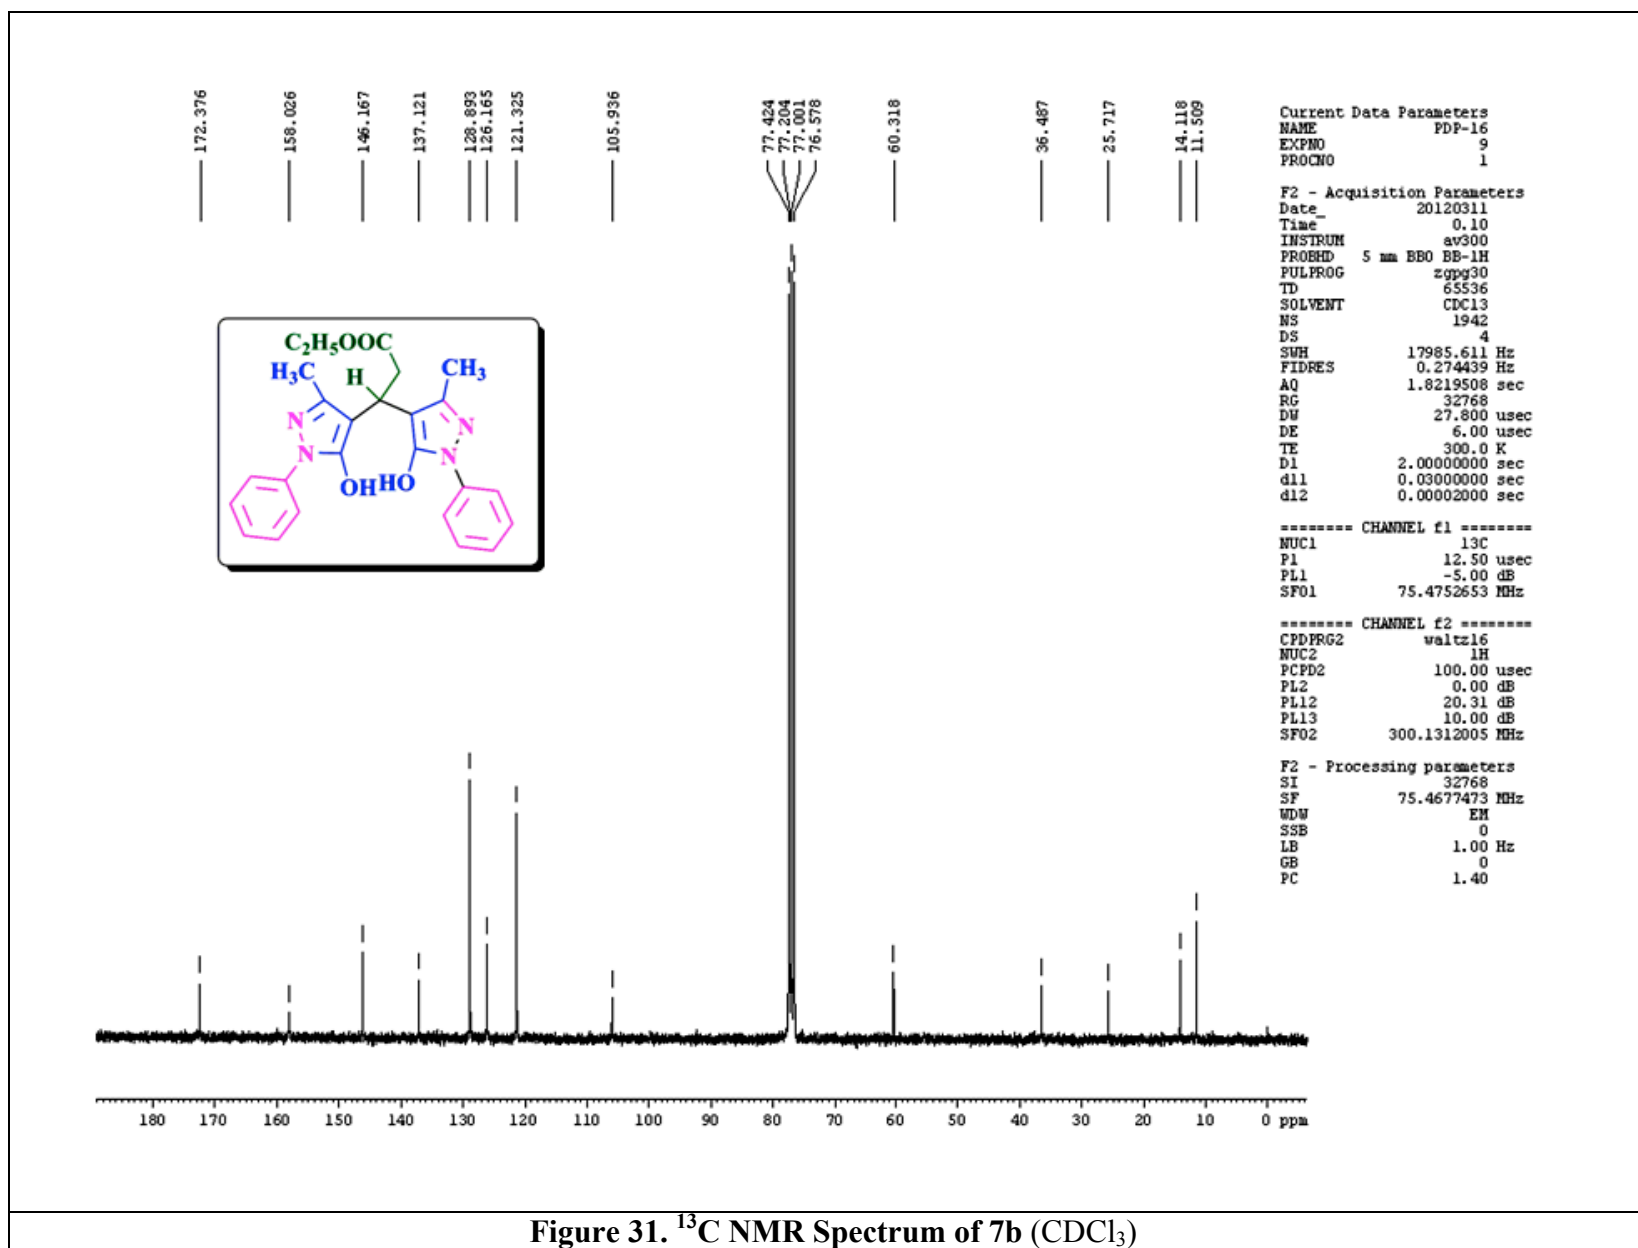

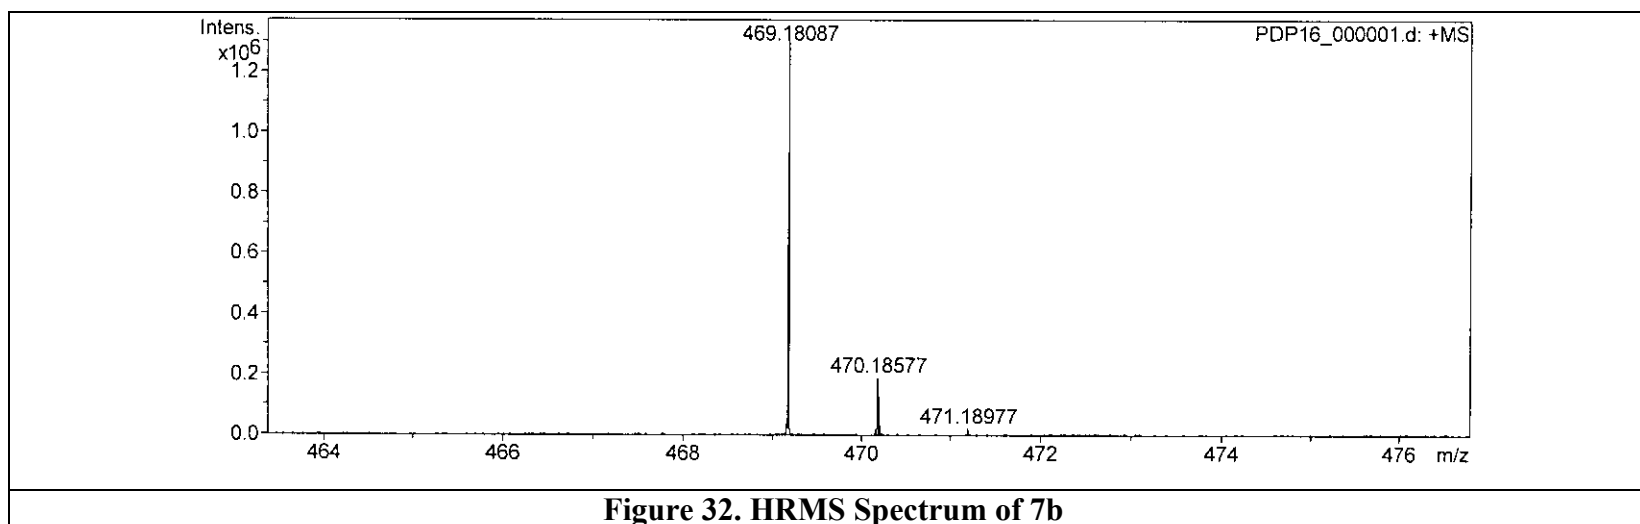

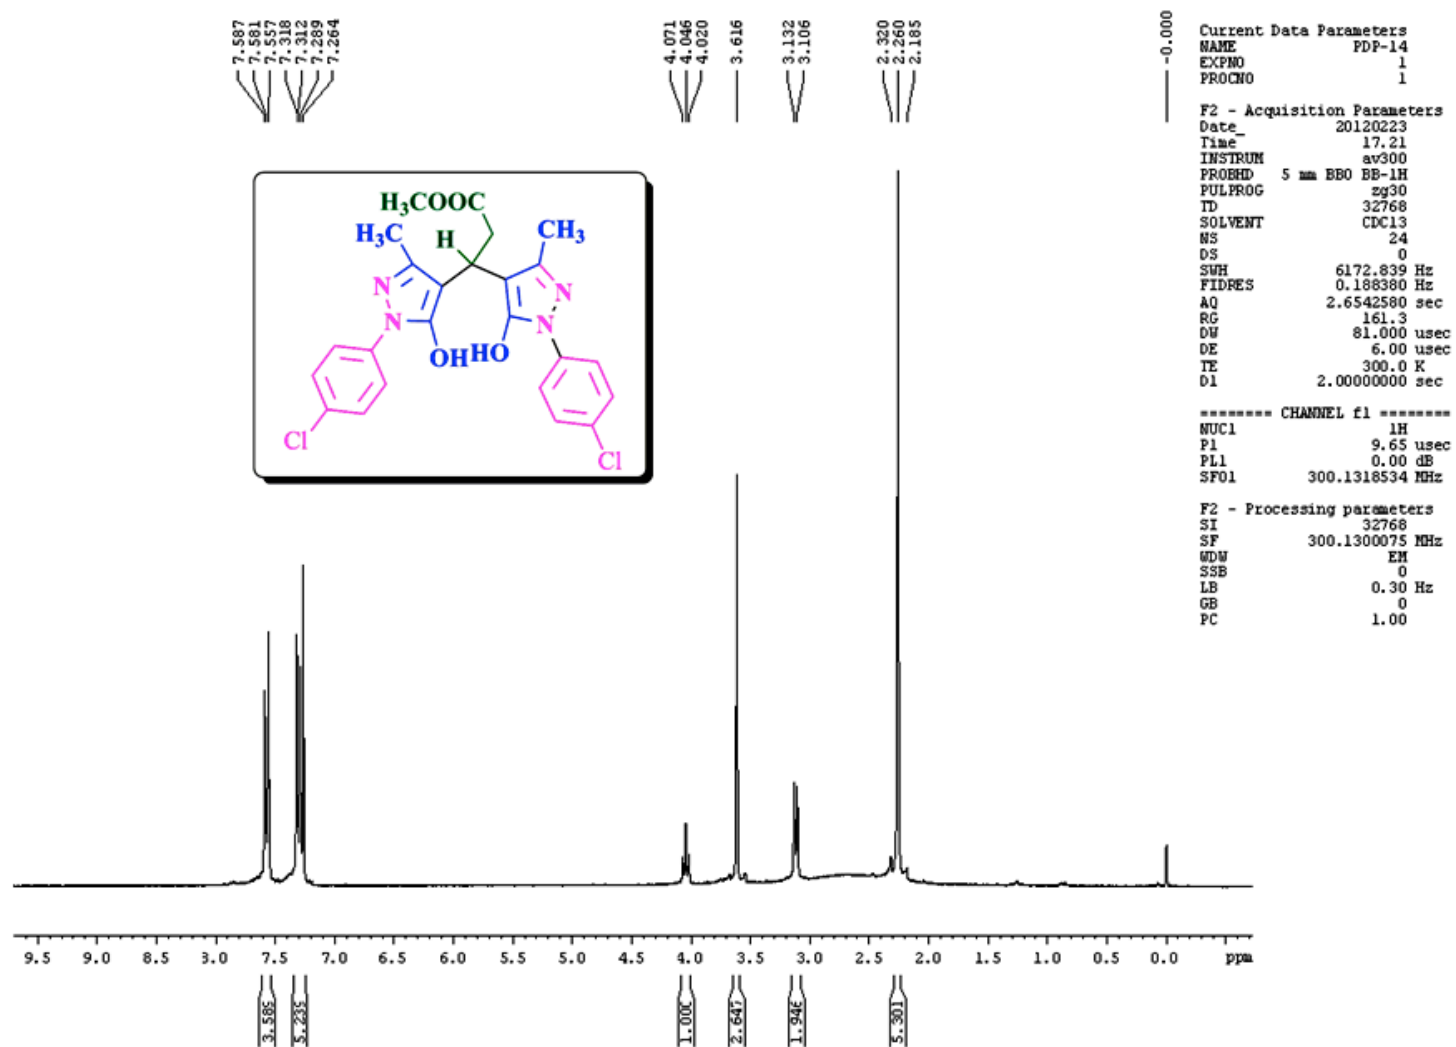

Figure 33.  $^1\text{H}$  NMR Spectrum of 7c ( $\text{CDCl}_3$ )



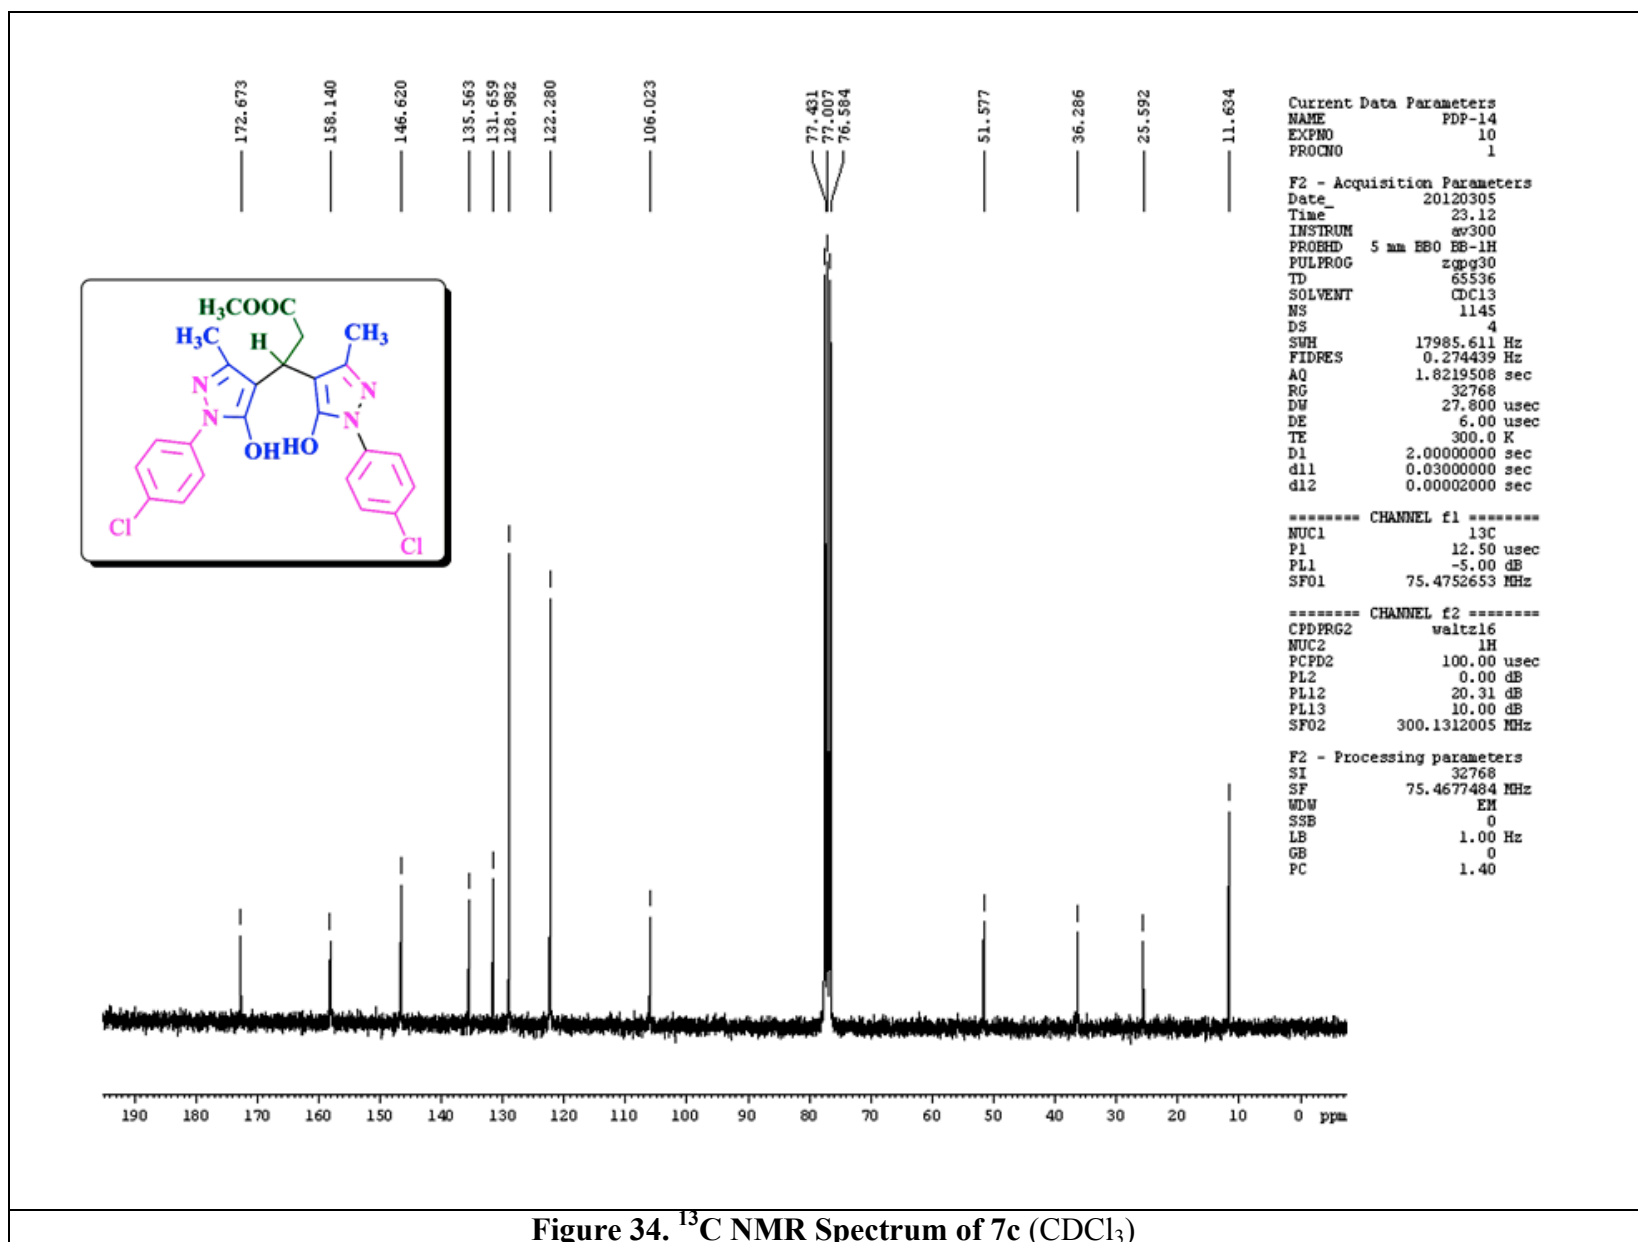

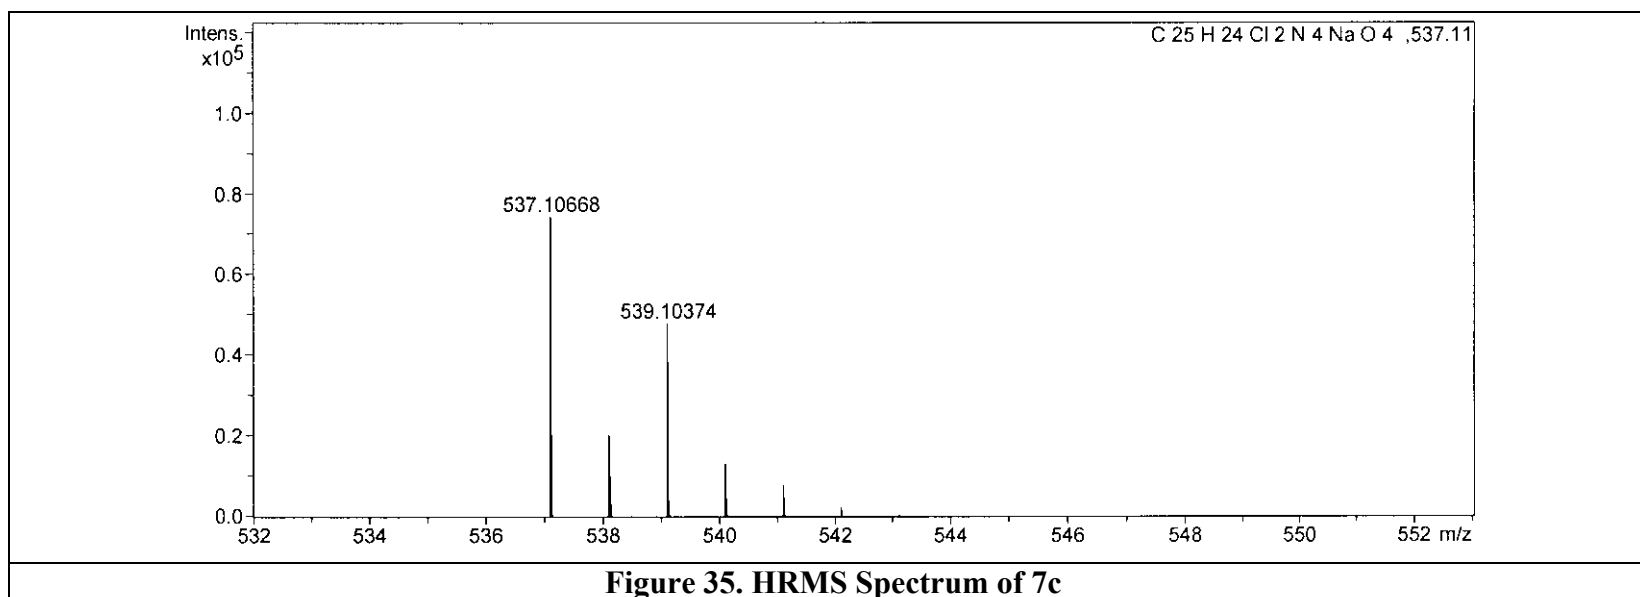

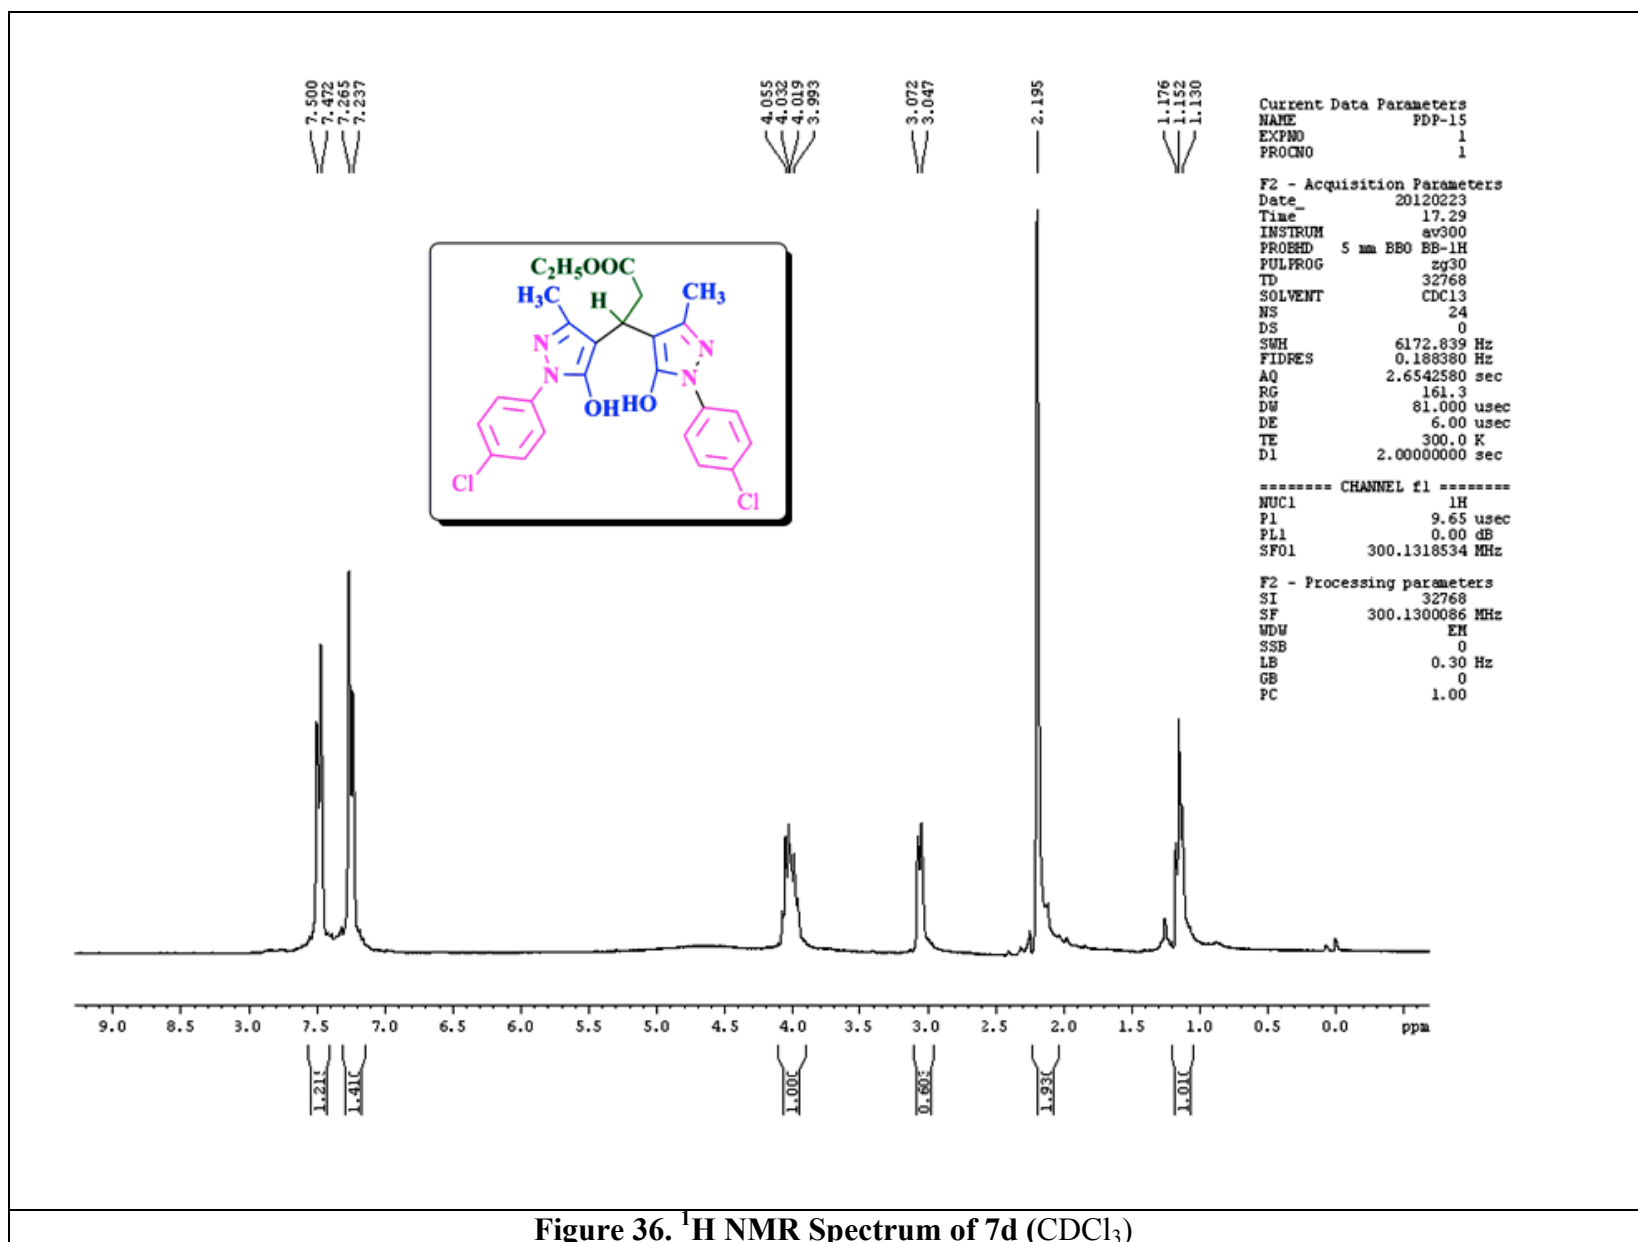

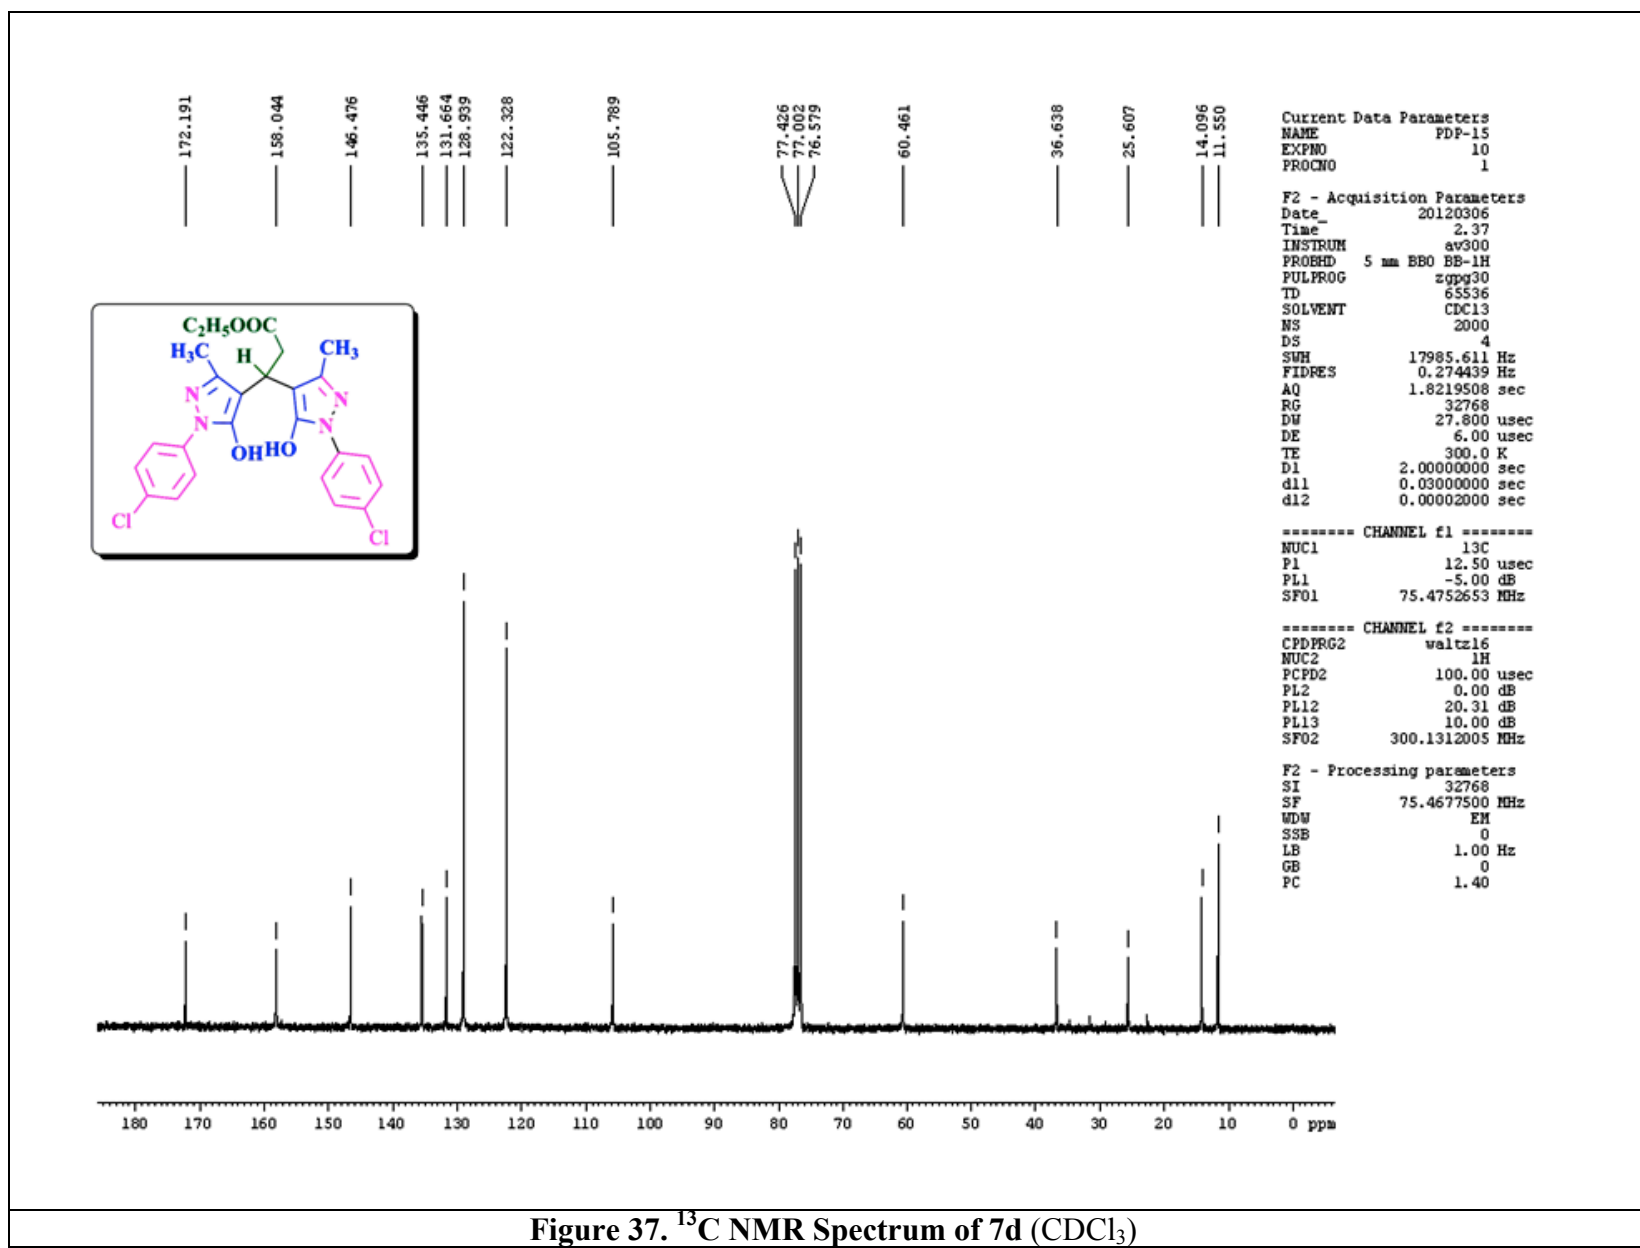

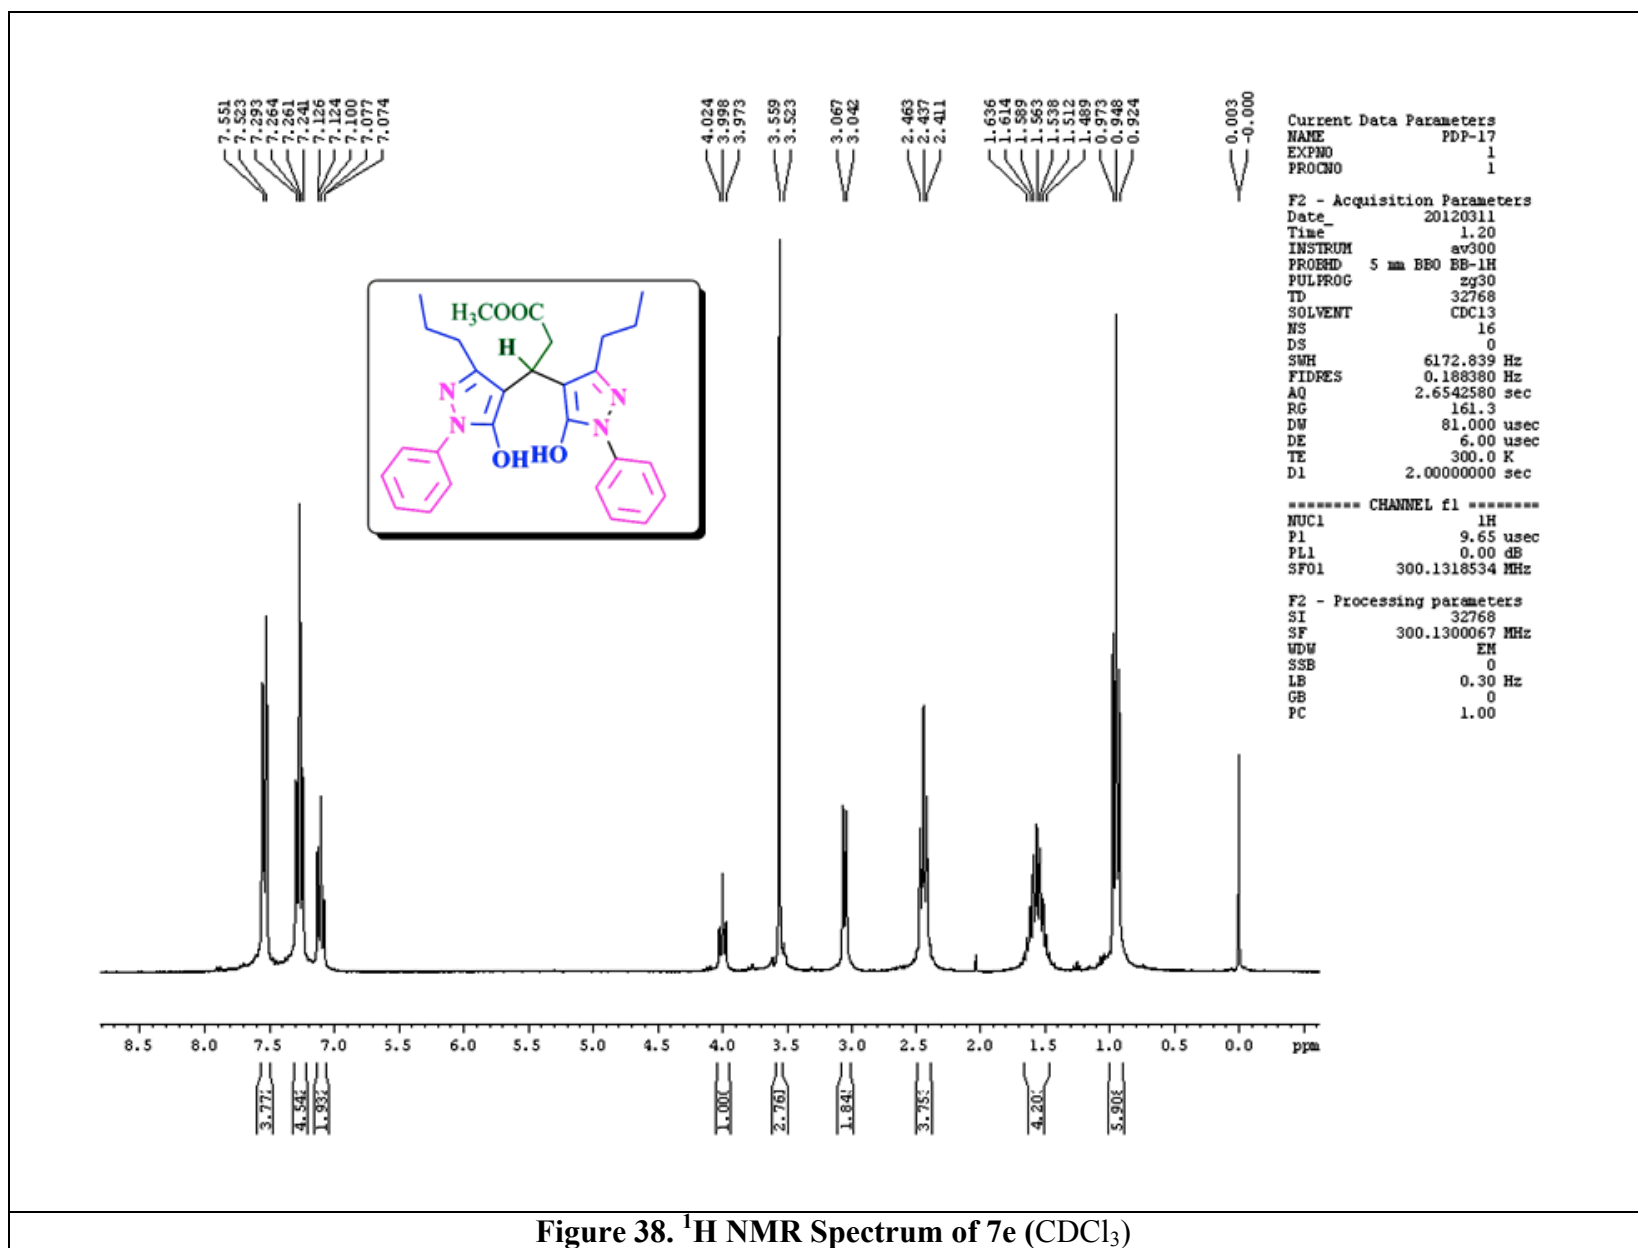

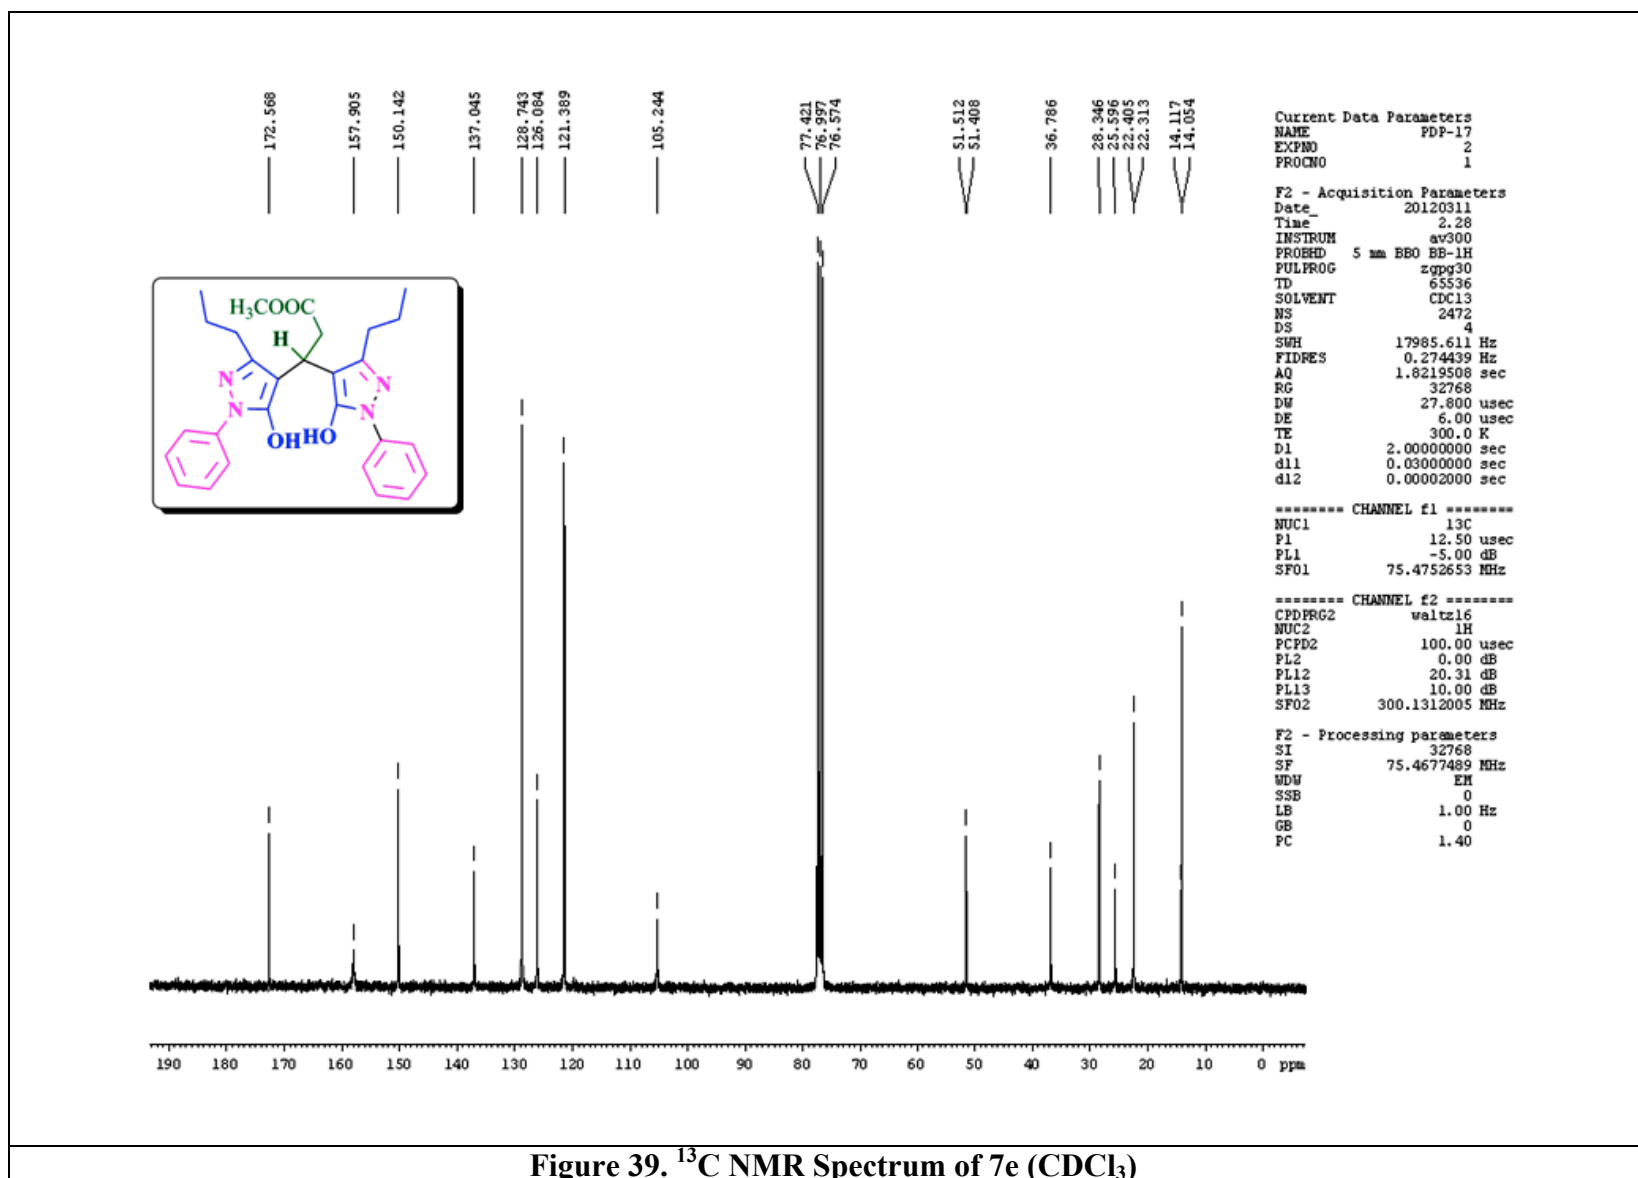

HPLC profile of 5a (Chiralcel OD-H column, 90% Hexane: 10% 2-propanol, 0.5 mL/min)

Compound 5a obtained in the D,L-proline-catalyzed reaction

Shimadzu CLASS-VP V6.14 SP1

Area % Report Page 1 of 1

Method Name: C:\CLASS-VP\untitled.met  
Data Name: E:\Class VP\Data\prasanna\PDP-1 racemic 10per 0.5 mL OD H  
User: System  
Acquired: 2/21/2013 14:27:27  
Printed: 2/23/2013 11:25:13

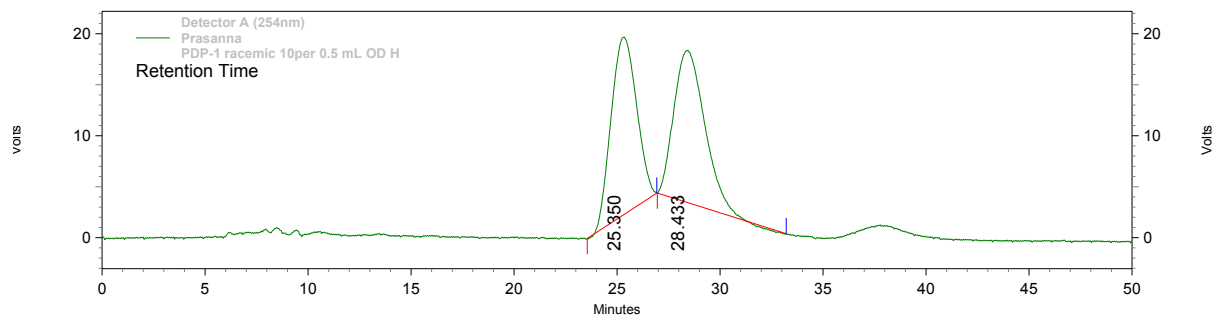

**Detector A (254nm)**

| Pk # | Retention Time | Area    | Area % | Height | Height % |
|------|----------------|---------|--------|--------|----------|
| 1    | 25.350         | 1497114 | 49.113 | 17390  | 53.786   |
| 2    | 28.433         | 1551170 | 50.887 | 14942  | 46.214   |

|        |  |         |         |       |         |
|--------|--|---------|---------|-------|---------|
| Totals |  | 3048284 | 100.000 | 32332 | 100.000 |
|--------|--|---------|---------|-------|---------|

HPLC profile of 5a (Chiralcel OD-H column, 90% Hexane: 10% 2-propanol, 0.5 mL/min)

Compound 5a obtained in the L-proline-catalyzed reaction

Shimadzu CLASS-VP V6.14 SP1

Area % Report Page 1 of 1

Method Name: C:\CLASS-VP\untitled.met  
Data Name: E:\Class VP\Data\prasanna\PDP-1 10per 0.5 mL OD H  
User: System  
Acquired: 2/21/2013 15:19:38  
Printed: 2/23/2013 11:27:13

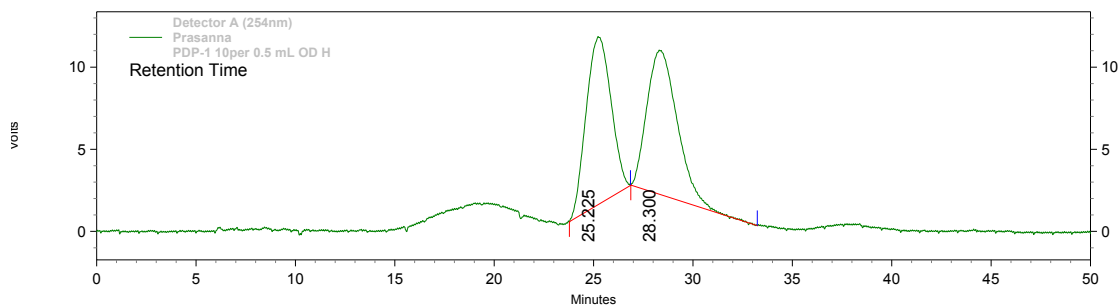

| Detector A (254nm) |                |         |         |        |          |
|--------------------|----------------|---------|---------|--------|----------|
| Pk #               | Retention Time | Area    | Area %  | Height | Height % |
| 1                  | 25.225         | 889289  | 48.800  | 10241  | 53.860   |
| 2                  | 28.300         | 933015  | 51.200  | 8773   | 46.140   |
| Totals             |                | 1822304 | 100.000 | 19014  | 100.000  |



HPLC profile of **5f** (Chiralcel OD-H column, solvent: 90% Hexane-10% 2-propanol, flow rate = 0.5 mL/min)

Compound **5f** obtained in the D,L-proline-catalyzed reaction

Shimadzu CLASS-VP V6.14 SP1

Area % Report Page 1 of 1

Method Name: C:\CLASS-VP\untitled.met  
Data Name: E:\Class VP\Data\prasanna\PDP-8 racemic 10 per 0.5 mL OD H  
User: System  
Acquired: 2/22/2013 15:59:41  
Printed: 2/23/2013 11:29:52

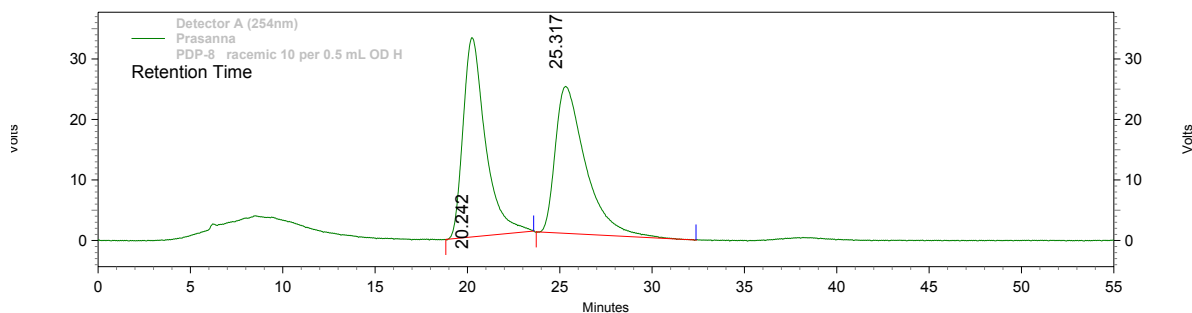

Detector A (254nm)

| Pk # | Retention Time | Area    | Area % | Height | Height % |
|------|----------------|---------|--------|--------|----------|
| 1    | 20.242         | 2769414 | 50.073 | 32943  | 57.561   |
| 2    | 25.317         | 2761387 | 49.927 | 24288  | 42.439   |

|        |  |         |         |       |         |
|--------|--|---------|---------|-------|---------|
| Totals |  | 5530801 | 100.000 | 57231 | 100.000 |
|--------|--|---------|---------|-------|---------|

HPLC profile of **5f** (Chiralcel OD-H column, 90% Hexane: 10% 2-propanol, 0.5 mL/min)

Compound **5f** obtained in the L-proline-catalyzed reaction

Shimadzu CLASS-VP V6.14 SP1

Area % Report Page 1 of 1

Method Name: C:\CLASS-VP\untitled.met

Data Name: E:\Class VP\Data\prasanna\PDP-8 10 per 0.5 mL OD H

User: System

Acquired: 2/22/2013 14:57:17

Printed: 2/23/2013 11:31:06

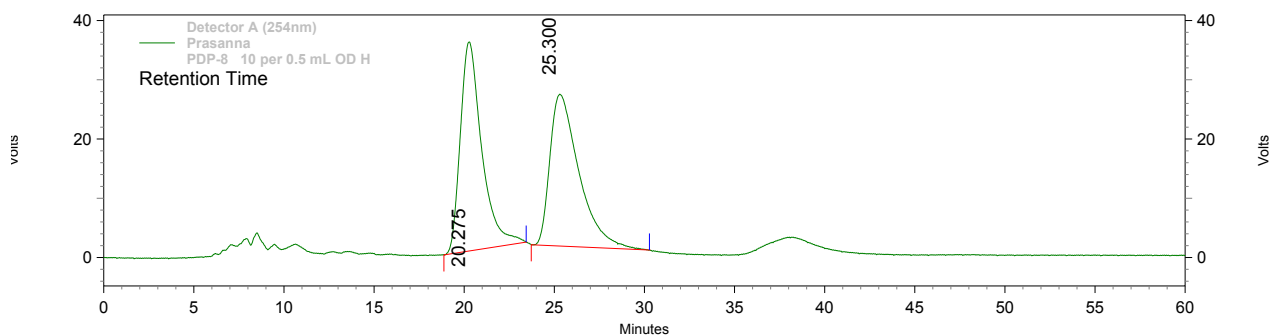

Detector A (254nm)

| Pk # | Retention Time | Area    | Area % | Height | Height % |
|------|----------------|---------|--------|--------|----------|
| 1    | 20.275         | 2918721 | 50.424 | 35271  | 57.913   |
| 2    | 25.300         | 2869623 | 49.576 | 25632  | 42.087   |

|        |  |         |         |       |         |
|--------|--|---------|---------|-------|---------|
| Totals |  | 5788344 | 100.000 | 60903 | 100.000 |
|--------|--|---------|---------|-------|---------|
